# Supplementary material for: Synthesis of divalent ytterbium terphenylamide and catalytic application for regioselective hydrosilylation of alkenes
Source: Royal Society of Chemistry journal article supplement (doi:10.1039/c7dt01837a), 2017-01-01

## Supporting Information

### Synthesis of Divalent Ytterbium Terphenylamide and Catalytic Application for Regioselective Hydrosilylation of Alkenes

Yinghua Shi,<sup>a</sup> Jianfeng Li,<sup>\*a</sup> Chunming Cui<sup>\*a,b</sup>

<sup>a</sup>State Key Laboratory of Elemento-Organic Chemistry, Nankai University, Tianjin 300071;

<sup>b</sup>Collaborative Innovation Center of Chemical Science and Engineering (Tianjin), Tianjin  
300071, People's Republic of China

E-mail: lijf@nankai.edu.cn, cmcui@nankai.edu.cn.

Homepage: <http://cui.nankai.edu.cn>

## Table of Contents

|                                                            |     |
|------------------------------------------------------------|-----|
| X-Ray Crystallography .....                                | S3  |
| Procedures and Products of Hydrosilylation Reactions ..... | S5  |
| References .....                                           | S21 |
| The NMR, IR and GC-MS Spectra of Products .....            | S22 |

## X-ray Crystallography

Table S1. Crystallographic detail for **1**\*C<sub>7</sub>H<sub>8</sub>.

|                                   |                                                                                                           |
|-----------------------------------|-----------------------------------------------------------------------------------------------------------|
| Empirical formula                 | C <sub>63</sub> H <sub>88</sub> N <sub>4</sub> Si <sub>4</sub> Yb <sub>2</sub>                            |
| Formula weight                    | 1359.81                                                                                                   |
| temperature                       | 113(2)                                                                                                    |
| wavelength                        | 0.71075 Å                                                                                                 |
| Crystal system, space group       | Monoclinic, P 2 <sub>1</sub> /n                                                                           |
| Unit cell dimensions              | a=14.368(3) Å    alpha= 90.00 °<br>b=23.236(4) Å    beta = 106.498(3) °<br>c=19.877(4) Å    gamma=90.00 ° |
| volume                            | 6363(2) Å <sup>3</sup>                                                                                    |
| Z, Calculated    density          | 4, 1.420 Mg/m <sup>3</sup>                                                                                |
| F(000)                            | 2760                                                                                                      |
| Absorption    coefficient         | 3.036 mm <sup>-1</sup>                                                                                    |
| Crystal size                      | 0.32 × 0.24 × 0.20 mm                                                                                     |
| Theta range for data collection   | 2.66 to 27.88 deg                                                                                         |
| Limiting indices                  | -14 ≤ h ≤ 13, -15 ≤ K ≤ 13, -18 ≤ l ≤ 18                                                                  |
| Reflections collected / unique    | 14713 / 7126 [R(int) = 0.0304]                                                                            |
| Completeness to theta = 27.88     | 97.1 %                                                                                                    |
| Absorption correction             | Semi-empirical from equivalents                                                                           |
| Max. and min. transmission        | 0.4736 and 0.3979                                                                                         |
| Refinement method                 | Full-matrix least-squares on F <sup>2</sup>                                                               |
| Data / restraints / parameters    | 7126 / 92 / 357                                                                                           |
| Goodness-of-fit on F <sup>2</sup> | 1.075                                                                                                     |
| Final R indices [I > 2σ(I)]       | R1 = 0.0243, wR2 = 0.0596                                                                                 |
| R indices (all data)              | R1 = 0.0264, wR2 = 0.0603                                                                                 |
| Largest diff. Peak and hole       | 0.991 and -1.374 e.Å <sup>-3</sup>                                                                        |
| CCDC number                       | 1545004                                                                                                   |

Table S2. Crystallographic detail for **2**\*C<sub>7</sub>H<sub>8</sub>.

|                                 |                                                                     |                   |
|---------------------------------|---------------------------------------------------------------------|-------------------|
| Empirical formula               | C <sub>61</sub> H <sub>66</sub> N <sub>2</sub> O <sub>2</sub> Si Yb |                   |
| Formula weight                  | 1060.29                                                             |                   |
| Temperature                     | 113(2)K                                                             |                   |
| Wavelength                      | 0.71075 Å                                                           |                   |
| Crystal system, space group     | Triclinic, P-1                                                      |                   |
| Unit cell dimensions            | a=17.100(2) Å                                                       | α =71.668(6) deg. |
|                                 | b=17.5072(17) Å                                                     | β =85.793(6) deg. |
|                                 | c=19.438(2) Å                                                       | γ =71.566(5) deg. |
| Volume                          | 5238.3(11) Å <sup>3</sup>                                           |                   |
| Z, Calculated density           | 4, 1.344 Mg/m <sup>3</sup>                                          |                   |
| Absorption coefficient          | 1.852 mm <sup>-1</sup>                                              |                   |
| F(000)                          | 2184                                                                |                   |
| Crystal size                    | 0.26 × 0.24 × 0.22 mm                                               |                   |
| Theta range for data collection | 1.26 to 27.88 deg.                                                  |                   |
| Limiting indices                | -22 ≤ h ≤ 22, -23 ≤ k ≤ 20, -25 ≤ l ≤ 25                            |                   |
| Reflections collected/unique    | 58425/24765 [R(int)= 0.0409]                                        |                   |
| Completeness to theta=27.88     | 99/1%                                                               |                   |
| Absorption correction           | Semi-empirical from equivalents                                     |                   |
| Max. and min. transmission      | 0.6861 and 0.6445                                                   |                   |
| Refinement method               | Full-matrix least-squares on F <sup>2</sup>                         |                   |
| CCDC number                     | 1545003                                                             |                   |



**General Procedures for the Catalytic Hydrosilylation Reactions.** In an Ar glove box, a Schlenk tube (10 ml) was charged with catalyst **1** (0.005-0.01 mmol) and toluene (0.2 mL). And then silane (1.0 mmol) and the appropriate alkene or diene (1.0 mmol) were added by microsyringe. The Schlenk tube was quickly removed from the glovebox. The reaction mixture was stirred 4-8 h at 60-90 °C using oil bath, and then the resulting solution was concentrated in vacuum. The crude product was purified by column chromatography on silica gel with hexane as eluent.

#### Phenyl(1-phenylethyl)silane (**4a**)<sup>1</sup>

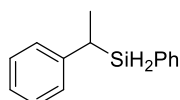

The reaction was carried out according to general method by using catalyst A (6.4 mg, 0.005 mmol), Styrene (104 mg, 1.0 mmol) and PhSiH<sub>3</sub> (108 mg, 1.0 mmol) at 60 °C for 4 h and then the resulting solution was concentrated in vacuum. The crude product was purified by column chromatography on silica gel with hexane as eluent. The title compound was isolated (201 mg, 95 %) as a colorless oil. <sup>1</sup>H NMR (400 MHz, CDCl<sub>3</sub>): δ 7.66 (m, 2H, Ar-*H*), 7.63 – 7.56 (m, 2H, Ar-*H*), 7.50 (m, 4H, Ar-*H*), 7.35 (m, 2H, Ar-*H*), 4.62 (s, 2H, SiH<sub>2</sub>), 2.86 (m, 1H, C-*H*), 1.71 (d, <sup>3</sup>J<sub>H-H</sub> = 7.4 Hz, 3H, Me). <sup>13</sup>C NMR (101 MHz, CDCl<sub>3</sub>): δ 144.7, 135.9, 131.6, 130.0, 128.6, 128.1, 127.4, 125.3 (Ar-C), 25.6 (Me), 16.6 (CHSi). <sup>29</sup>Si NMR (79 MHz, CDCl<sub>3</sub>): δ -20.6 (SiH<sub>2</sub>). GC-MS (EI): Calcd for C<sub>14</sub>H<sub>16</sub>Si: 212.10, found: 212.21. This compound was known.

#### Phenyl(1-(*p*-tolyl)ethyl)silane (**4b**)<sup>2</sup>

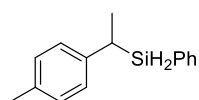

The reaction was carried out according to general method by using catalyst A (6.4 mg, 0.005 mmol), 4-Methylstyrene (118 mg, 1.0 mmol) and PhSiH<sub>3</sub> (108 mg, 1.0 mmol) at 60 °C for 4 h and then the resulting solution was concentrated in vacuum. The crude product was purified by column chromatography on silica gel with hexane as eluent. The title compound was isolated (215 mg, 95 %) as a colorless oil. <sup>1</sup>H NMR (400 MHz, CDCl<sub>3</sub>): δ 7.53 (m, 2H, Ar-*H*), 7.44 (m, 2H, Ar-*H*), 7.41–7.36 (m, 2H, Ar-*H*), 7.16–7.11 (m, 3H, Ar-*H*), 4.47 (s, 2H, SiH<sub>2</sub>), 2.68 (m, 1H, CH), 2.40 (s, 3H, Ar-Me), 1.55 (d, <sup>3</sup>J<sub>H-H</sub> = 7.4 Hz, 3H, CH-Me). <sup>13</sup>C NMR (101 MHz, CDCl<sub>3</sub>): δ 141.7, 136.0, 130.0, 129.4, 128.1, 127.3 (Ar-C), 25.1 (CH-Me), 21.2 (Ar-Me), 16.9 (CHSi). <sup>29</sup>Si NMR (79 MHz, CDCl<sub>3</sub>): δ -20.8 (SiH<sub>2</sub>). GC-MS (EI): Calcd for C<sub>15</sub>H<sub>18</sub>Si: 226.12, found: 226.24. This compound was known.

#### (1-(4-Methoxyphenyl)ethyl)(phenyl)silane (**4c**)<sup>3</sup>

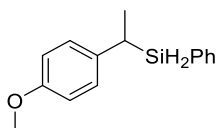

The reaction was carried out according to general method by using catalyst A (6.4 mg, 0.005 mmol), 4-Methoxystyrene (134 mg, 1.0 mmol) and PhSiH<sub>3</sub> (108 mg, 1.0 mmol) at 60 °C for 6 h and then the reaction mixture was concentrated in vacuum. The crude product was purified by column chromatography on silica gel with hexane as eluent. The title compound was isolated (230 mg, 95 %) as a colorless oil. <sup>1</sup>H NMR (400 MHz, CDCl<sub>3</sub>): δ 7.60 (m, 2H, Ar-*H*), 7.52 (m, 3H, Ar-*H*), 7.21 (m, 2H, Ar-*H*), 7.00 (m, 2H, Ar-*H*), 4.54 (s, 2H, SiH<sub>2</sub>), 3.92 (s, 3H, ArO-Me), 2.75 (m, 1H, CH), 1.63 (d, <sup>3</sup>J<sub>H-H</sub> = 7.3 Hz, 3H, Me). <sup>13</sup>C NMR (101 MHz, CDCl<sub>3</sub>): δ 158.1, 137.3, 136.6, 132.4, 130.6, 129.0, 128.9, 128.8 (Ar-C), 56.0 (ArO-Me), 25.1 (Me), 17.7 (CHSi). <sup>29</sup>Si NMR (79 MHz, CDCl<sub>3</sub>): δ -21.2 (SiH<sub>2</sub>). GC-MS (EI): Calcd for C<sub>15</sub>H<sub>18</sub>OSi: 242.11, found: 242.23. This compound was known.

#### PhCH<sub>3</sub>C(SiH<sub>2</sub>Ph)CH<sub>3</sub> (**4d**)<sup>3</sup>

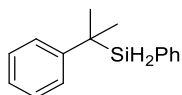

The reaction was carried out according to general method by using catalyst A (12.7 mg, 0.01 mmol), 2-Phenyl-1-propene (118 mg, 1.0 mmol) and PhSiH<sub>3</sub> (108 mg, 1.0 mmol) at 70 °C for 6 h and then the reaction mixture was concentrated in vacuum. The crude product was purified by column chromatography on silica gel with hexane as eluent. The title compound was isolated (208 mg, 92 %) as a colorless oil. <sup>1</sup>H NMR (400 MHz, C<sub>6</sub>D<sub>6</sub>): δ 7.53–7.05 (m, 10H, Ar-*H*), 4.44 (s, 2H, SiH<sub>2</sub>), 1.36 (s, 6H, Me). <sup>13</sup>C NMR (101 MHz, C<sub>6</sub>D<sub>6</sub>): δ 136.2, 135.9, 129.9, 128.4, 127.9, 126.3, 125.7, 125.2 (Ar-C), 26.5 (Me), 25.3 (Me<sub>2</sub>-C). <sup>29</sup>Si NMR (79 MHz, C<sub>6</sub>D<sub>6</sub>): δ -13.3 (SiH<sub>2</sub>). GC-MS (EI): Calcd for C<sub>15</sub>H<sub>18</sub>Si: 226.12, found: 226.17. This compound was known.

#### Ph<sub>2</sub>C(CH<sub>3</sub>)SiH<sub>2</sub>Ph (**4e**)<sup>3</sup>

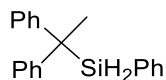

The reaction was carried out according to general method by using catalyst A (12.7 mg, 0.01 mmol), 1,1-Diphenylethylene (180 mg, 1.0 mmol) and PhSiH<sub>3</sub> (108 mg, 1.0 mmol) at 70 °C for 8 h and then the reaction mixture was concentrated in vacuum. The crude product was purified by column chromatography on silica gel with hexane as eluent. The title compound was isolated (268 mg, 93 %) as a colorless oil. <sup>1</sup>H NMR (400 MHz, CDCl<sub>3</sub>): δ 7.61–7.39 (m, 15H, Ar-*H*), 5.04 (s, 2H, SiH<sub>2</sub>), 2.09 (s, 3H, Me). <sup>13</sup>C

NMR (101 MHz,  $\text{CDCl}_3$ ):  $\delta$  146.3, 135.2, 134.6, 129.8, 128.7, 127.2, 126.5, 124.5 (Ar-C), 36.5 ( $\text{Ph}_2\text{-C}$ ), 24.5 (Me).  $^{29}\text{Si}$  NMR (79 MHz,  $\text{C}_6\text{D}_6$ ):  $\delta$  -19.3 ( $\text{SiH}_2$ ). GC-MS (EI): Calcd for  $\text{C}_{20}\text{H}_{20}\text{Si}$ : 228.13, found: 228.20. This compound was known.

[1-(2-Naphthyl)-1-ethyl](phenyl)silane (**4f**)<sup>3</sup>

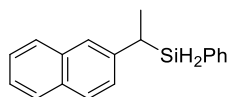

The reaction was carried out according to general method by using catalyst A (6.4 mg, 0.005 mmol), 2-Vinylnaphthalene (154 mg, 1.0 mmol) and  $\text{PhSiH}_3$  (108 mg, 1.0 mmol) at 70 °C for 6 h and then the reaction mixture was concentrated in vacuum. The crude product was purified by column chromatography on silica gel with hexane as eluent. The title compound was isolated (250 mg, 95 %) as a colorless oil.  $^1\text{H}$  NMR (400 MHz,  $\text{CDCl}_3$ ):  $\delta$  8.09–8.01 (m, 3H, Ar-*H*), 7.85 (s, 1H, Ar-*H*), 7.76–7.71 (m, 3H, Ar-*H*), 7.67 (m, 2H, Ar-*H*), 7.62–7.55 (m, 3H, Ar-*H*), 4.78 (m, 2H,  $\text{SiH}_2$ ), 3.16–3.04 (m, 1H, CH), 1.89 (d,  $^3J_{\text{H-H}} = 7.4$  Hz, 3H, Me).  $^{13}\text{C}$  NMR (101 MHz,  $\text{CDCl}_3$ ):  $\delta$  141.0, 134.5, 132.7, 130.5, 130.1, 128.7, 126.8, 126.7, 126.5, 126.2, 125.5, 124.8, 123.7, 123.4 (Ar-C), 24.5 (Me), 15.3 (CH).  $^{29}\text{Si}$  NMR (79 MHz,  $\text{C}_6\text{D}_6$ ):  $\delta$  -21.4 ( $\text{SiH}_2$ ). GC-MS (EI): Calcd for  $\text{C}_{18}\text{H}_{18}\text{Si}$ : 262.12, found: 262.18. This compound was known.

phenyl(3-phenylpropyl)silane (**4g**)<sup>3</sup>

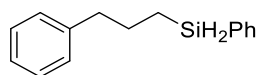

The reaction was carried out according to general method by using catalyst A (6.4 mg, 0.005 mmol), Allylbenzene (118 mg, 1.0 mmol) and  $\text{PhSiH}_3$  (108 mg, 1.0 mmol) at 70 °C for 6 h and then the reaction mixture was concentrated in vacuum. The crude product was purified by column chromatography on silica gel with hexane as eluent. The title compound was isolated (204 mg, 90 %) as a colorless oil.  $^1\text{H}$  NMR (400 MHz,  $\text{C}_6\text{D}_6$ ):  $\delta$  7.46 (m, 2H, Ar-*H*), 7.13 (m, 5H, Ar-*H*), 7.08–7.04 (m, 1H, Ar-*H*), 6.99 (m, 2H, Ar-*H*), 4.43 (m, 2H,  $\text{SiH}_2$ ), 2.46 (m, 2H, Ar- $\text{CH}_2$ ), 1.65 (m, 2H,  $\text{CH}_2$ ), 0.79 (m, 2H,  $\text{CH}_2\text{Si}$ ).  $^{13}\text{C}$  NMR (101 MHz,  $\text{C}_6\text{D}_6$ ):  $\delta$  141.9, 135.2, 132.2, 129.5, 128.5, 128.3, 128.0, 125.8 (Ar-C), 39.0 (Ar- $\text{CH}_2$ ), 27.0 ( $\text{CH}_2$ ), 9.7 ( $\text{CH}_2\text{Si}$ ).  $^{29}\text{Si}$  NMR (79 MHz,  $\text{C}_6\text{D}_6$ ):  $\delta$  -31.0 ( $\text{SiH}_2$ ). GC-MS (EI): Calcd for  $\text{C}_{15}\text{H}_{18}\text{Si}$ : 226.12, found: 226.20.

Phenyl(4-phenylbutyl)silane (**4h**)<sup>4</sup>

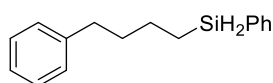

The reaction was carried out according to general method by using catalyst A (6.4 mg, 0.005 mmol), 4-Phenyl-1-butene (132 mg, 1.0 mmol) and  $\text{PhSiH}_3$  (108 mg, 1.0 mmol) at 70 °C for 6 h and then the

reaction mixture was concentrated in vacuum. The crude product was purified by column chromatography on silica gel with hexane as eluent. The title compound was isolated (215 mg, 90 %) as a colorless oil.  $^1\text{H}$  NMR (400 MHz,  $\text{C}_6\text{D}_6$ ):  $\delta$  7.50–7.45 (m, 2H, Ar-*H*), 7.16 (m, 2H, Ar-*H*), 7.14 (m, 3H, Ar-*H*), 7.07 (m, 1H, Ar-*H*), 7.02 (m, 2H, Ar-*H*), 4.50–4.39 (m, 2H,  $\text{SiH}_2$ ), 2.43–2.37 (m, 2H, Ar- $\text{CH}_2$ ), 1.58–1.48 (m, 2H,  $\text{CH}_2$ ), 1.44–1.30 (m, 2H,  $\text{CH}_2$ ), 0.78 (m, 2H,  $\text{CH}_2\text{Si}$ ).  $^{13}\text{C}$  NMR (101 MHz,  $\text{C}_6\text{D}_6$ ):  $\delta$  142.3, 135.2, 132.3, 129.5, 128.4, 128.3, 128.0, 125.7 (Ar-C), 35.6 (Ar- $\text{CH}_2$ ), 34.6 ( $\text{CH}_2$ ), 24.7 ( $\text{CH}_2$ ), 9.9 ( $\text{CH}_2\text{Si}$ ).  $^{29}\text{Si}$  NMR (79 MHz,  $\text{C}_6\text{D}_6$ ):  $\delta$  -31.1 ( $\text{SiH}_2$ ). GC-MS (EI): Calcd for  $\text{C}_{16}\text{H}_{20}\text{Si}$ : 240.13, found: 240.22.

#### (2-Cyclohexylethyl)(phenyl)silane (**4i**)<sup>5</sup>

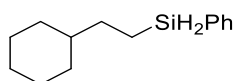

The reaction was carried out according to general method by using catalyst A (12.7 mg, 0.01 mmol), Vinylcyclohexane (110 mg, 1.0 mmol) and  $\text{PhSiH}_3$  (108 mg, 1.0 mmol) at 70 °C for 6 h and then the reaction mixture was concentrated in vacuum. The crude product was purified by column chromatography on silica gel with hexane as eluent. The title compound was isolated (160 mg, 70 %) as a colorless oil.  $^1\text{H}$  NMR (400 MHz,  $\text{CDCl}_3$ ):  $\delta$  7.71 (m, 2H, Ar-*H*), 7.48 (m, 3H, Ar-*H*), 4.44 (s, 2H,  $\text{SiH}_2$ ), 1.83 (m, 6H,  $\text{CH}_2$ , CH), 1.46–1.31 (m, 5H,  $\text{CH}_2$ ), 1.05–0.85 (m, 4H,  $\text{CH}_2$ ,  $\text{CH}_2\text{Si}$ ).  $^{13}\text{C}$  NMR (101 MHz,  $\text{CDCl}_3$ ):  $\delta$  135.9, 135.4, 129.6, 128.3 (Ar-C), 40.5 (CH), 33.1, 32.7, 27.0, 26.6 ( $\text{CH}_2$ ), 7.3 ( $\text{CH}_2\text{Si}$ ).  $^{29}\text{Si}$  NMR (79 MHz,  $\text{CDCl}_3$ ):  $\delta$  -29.9 ( $\text{SiH}_2$ ). GC-MS (EI): Calcd for  $\text{C}_{14}\text{H}_{22}\text{Si}$ : 218.15, found: 218.27.

#### 4-[2-(Phenylsilyl)ethyl]cyclohex-1-ene (**4j**)<sup>6</sup>

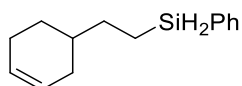

The reaction was carried out according to general method by using catalyst A (12.7 mg, 0.01 mmol), 4-Vinylcyclohexene (108 mg, 1.0 mmol) and  $\text{PhSiH}_3$  (108 mg, 1.0 mmol) at 70 °C for 6 h and then the reaction mixture was concentrated in vacuum. The crude product was purified by column chromatography on silica gel with hexane as eluent. The title compound was isolated (195 mg, 90 %) as a colorless oil.  $^1\text{H}$  NMR (400 MHz,  $\text{CDCl}_3$ ):  $\delta$  7.73 (m, 2H, Ar-*H*), 7.51 (m, 3H, Ar-*H*), 5.82 (s, 2H,  $\text{CH}=\text{CH}$ ), 4.48 (s, 2H,  $\text{SiH}_2$ ), 2.19 (s, 2H,  $\text{CH}_2$ ), 1.88–1.76 (m, 2H,  $\text{CH}_2$ ), 1.59–1.35 (m, 3H,  $\text{CH}_2$ ), 1.12 (s, 2H,  $\text{CH}_2$ ), 0.92 (m, 2H,  $\text{CH}_2\text{Si}$ ).  $^{13}\text{C}$  NMR (101 MHz,  $\text{CDCl}_3$ ):  $\delta$  135.4, 132.7, 129.7, 128.1 (Ar-C), 127.2, 126.7 ( $\text{CH}=\text{CH}$ ), 36.3 (CH), 32.0, 31.6, 28.6, 25.5 ( $\text{CH}_2$ ), 7.4 ( $\text{CH}_2\text{Si}$ ).  $^{29}\text{Si}$  NMR (79 MHz,  $\text{CDCl}_3$ ):  $\delta$  -29.9 ( $\text{SiH}_2$ ). GC-MS (EI): Calcd for  $\text{C}_{14}\text{H}_{20}\text{Si}$ : 216.13, found: 216.21.

#### (1-Hexyl)(phenyl)silane (**4k**)<sup>3</sup>

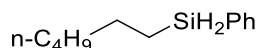

The reaction was carried out according to general method by using catalyst A (12.7 mg, 0.01 mmol), 1-Hexene (84 mg, 1.0 mmol) and PhSiH<sub>3</sub> (108 mg, 1.0 mmol) at 70 °C for 6 h and then the reaction mixture was concentrated in vacuum. The crude product was purified by column chromatography on silica gel with hexane as eluent. The title compound was isolated (145 mg, 75 %) as a colorless oil. <sup>1</sup>H NMR (400 MHz, CDCl<sub>3</sub>): δ 7.71 (m, 2H, Ar-*H*), 7.49 (m, 3H, Ar-*H*), 4.46 (s, 2H, SiH<sub>2</sub>), 1.4–1.08 (m, 8H, CH<sub>2</sub>), 0.9–0.75 (m, 5H, Me, CH<sub>2</sub>Si). <sup>13</sup>C NMR (101 MHz, CDCl<sub>3</sub>): δ 134.6, 134.2, 128.4, 126.9 (Ar-C), 31.5, 30.5, 24.0, 21.5 (CH<sub>2</sub>), 13.1 (Me), 9.0 (CH<sub>2</sub>Si). <sup>29</sup>Si NMR (79 MHz, CDCl<sub>3</sub>): δ -31.3 (SiH<sub>2</sub>). GC-MS (EI): Calcd for C<sub>12</sub>H<sub>20</sub>Si: 192.13, found: 192.24.

#### (1-Octyl)(phenyl)silane (**4l**)<sup>7</sup>

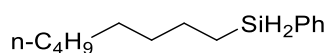

The reaction was carried out according to general method by using catalyst A (12.7 mg, 0.01 mmol), 1-Octene (112 mg, 1.0 mmol) and PhSiH<sub>3</sub> (108 mg, 1.0 mmol) at 70 °C for 6 h and then the reaction mixture was concentrated in vacuum. The crude product was purified by column chromatography on silica gel with hexane as eluent. The title compound was isolated (175 mg, 80 %) as a colorless oil. <sup>1</sup>H NMR (400 MHz, CDCl<sub>3</sub>): δ 7.69 (m, 2H, Ar-*H*), 7.44 (m, 3H, Ar-*H*), 4.45 (s, 2H, SiH<sub>2</sub>), 1.48–1.35 (m, 12H, CH<sub>2</sub>), 1.08–0.97 (m, 5H, Me, SiH<sub>2</sub>). <sup>13</sup>C NMR (101 MHz, CDCl<sub>3</sub>): δ 134.6, 134.1, 128.4, 126.9 (Ar-C), 32.0, 30.9, 28.3, 24.5, 24.1, 21.6 (CH<sub>2</sub>), 13.1 (Me), 9.0 (CH<sub>2</sub>Si). <sup>29</sup>Si NMR (79 MHz, CDCl<sub>3</sub>): δ -30.6 (SiH<sub>2</sub>). GC-MS (EI): Calcd for C<sub>14</sub>H<sub>24</sub>Si: 220.16, found: 220.26.

#### 1,6-bis(phenylsilyl)hexane (**4m**)<sup>8</sup>

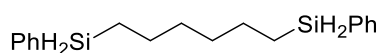

The reaction was carried out according to general method by using catalyst A (12.7 mg, 0.01 mmol), 1,5-Hexadiene (82 mg, 1.0 mmol) and PhSiH<sub>3</sub> (216 mg, 2.0 mmol) at 70 °C for 6 h and then the reaction mixture was concentrated in vacuum. The crude product was purified by column chromatography on silica gel with hexane as eluent. The title compound was isolated (210 mg, 70 %) as a colorless oil. <sup>1</sup>H NMR (400 MHz, C<sub>6</sub>D<sub>6</sub>): δ 7.53 (m, 4H, Ar-*H*), 7.21 (m, 6H, Ar-*H*), 4.50 (s, 4H, SiH<sub>2</sub>), 1.39 (m, 4H, CH<sub>2</sub>), 1.25 (m, 4H, CH<sub>2</sub>), 0.84 (s, 4H, SiH<sub>2</sub>). <sup>13</sup>C NMR (101 MHz, C<sub>6</sub>D<sub>6</sub>): δ 135.9, 135.4, 129.7, 128.2 (Ar-C), 32.6 (CH<sub>2</sub>), 25.2 (CH<sub>2</sub>), 10.3 (CH<sub>2</sub>Si). <sup>29</sup>Si NMR (79 MHz, C<sub>6</sub>D<sub>6</sub>): δ -31.0 (SiH<sub>2</sub>). GC-MS (EI): Calcd for C<sub>18</sub>H<sub>26</sub>Si: 298.16, found: 298.18.

### Hexyl(1-phenylethyl)silane (**5a**)

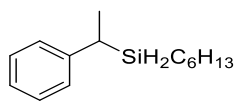

The reaction was carried out according to general method by using catalyst A (6.4 mg, 0.005 mmol), Styrene (104 mg, 1.0 mmol) and hexylsilane (116 mg, 1.0 mmol) at 60 °C for 4 h and then the resulting solution was concentrated in vacuum. The crude product was purified by column chromatography on silica gel with hexane as eluent. The title compound was isolated (213 mg, 97 %) as a colorless oil. <sup>1</sup>H NMR (400 MHz, C<sub>6</sub>D<sub>6</sub>): δ 7.14 (m, 2H, Ar-*H*), 7.07–6.97 (m, 3H, Ar-*H*), 3.95–3.82 (m, 2H, SiH<sub>2</sub>), 2.31–2.20 (m, 1H, CH), 1.35 (d, <sup>3</sup>J<sub>H-H</sub> = 7.5 Hz, 3H, CH-Me), 1.27–1.11 (m, 8H, CH<sub>2</sub>), 0.86 (t, <sup>3</sup>J<sub>H-H</sub> = 6.9 Hz, 3H, CH<sub>2</sub>-Me), 0.52 (s, 2H, CH<sub>2</sub>Si). <sup>13</sup>C NMR (101 MHz, C<sub>6</sub>D<sub>6</sub>): δ 145.4, 128.6, 127.0, 125.1 (Ar-C), 32.8 (CH<sub>2</sub>), 31.7 (CH<sub>2</sub>), 25.4 (CH<sub>2</sub>), 24.6 (CH-Me), 22.8 (CH<sub>2</sub>), 16.9 (CHSi), 14.2 (CH<sub>2</sub>-Me), 8.4 (CH<sub>2</sub>Si). <sup>29</sup>Si NMR (79 MHz, C<sub>6</sub>D<sub>6</sub>): δ -18.5 (SiH<sub>2</sub>). GC-MS (EI): Calcd for C<sub>14</sub>H<sub>24</sub>Si: 220.16, found: 220.25.

### Hexyl(1-(*p*-tolyl)ethyl)silane (**5b**)

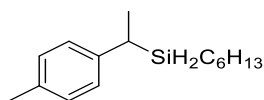

The reaction was carried out according to general method by using catalyst A (6.4 mg, 0.005 mmol), 4-Methylstyrene (118 mg, 1.0 mmol) and hexylsilane (116 mg, 1.0 mmol) at 60 °C for 4 h and then the resulting solution was concentrated in vacuum. The crude product was purified by column chromatography on silica gel with hexane as eluent. The title compound was isolated (227 mg, 97 %) as a colorless oil. <sup>1</sup>H NMR (400 MHz, C<sub>6</sub>D<sub>6</sub>): δ 6.97 (m, 4H, Ar-*H*), 3.88 (m, 2H, Ar-*H*), 2.32–2.22 (m, 1H, CH), 2.15 (s, 3H, Ar-Me), 1.36 (t, <sup>3</sup>J<sub>H-H</sub> = 9.5 Hz, 3H, CH-Me), 1.30–1.12 (m, 8H, CH<sub>2</sub>), 0.86 (t, <sup>3</sup>J<sub>H-H</sub> = 6.9 Hz, 3H, CH<sub>2</sub>-Me), 0.54 (m, 2H, CH<sub>2</sub>Si). <sup>13</sup>C NMR (101 MHz, C<sub>6</sub>D<sub>6</sub>): δ 142.2, 134.1, 129.3, 126.9 (Ar-C), 32.8 (CH<sub>2</sub>), 31.7 (CH<sub>2</sub>), 25.6 (CH<sub>2</sub>), 24.1 (CH-Me), 22.8 (CH<sub>2</sub>), 20.8 (Ar-Me), 17.1 (CHSi), 14.2 (CH<sub>2</sub>-Me), 8.4 (CH<sub>2</sub>Si). <sup>29</sup>Si NMR (79 MHz, C<sub>6</sub>D<sub>6</sub>): δ -18.7 (SiH<sub>2</sub>). GC-MS (EI): Calcd for C<sub>15</sub>H<sub>26</sub>Si: 234.18, found: 234.32.

### (1-(4-Methoxyphenyl)ethyl)(hexyl)silane (**5c**)

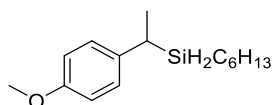

The reaction was carried out according to general method by using catalyst A (6.4 mg, 0.005 mmol), 4-Methoxystyrene (134 mg, 1.0 mmol) and hexylsilane (116 mg, 1.0 mmol) at 60 °C for 6 h and then the reaction mixture was concentrated in vacuum. The crude product was purified by column chromatography on silica gel with hexane as eluent. The title compound was isolated (237 mg, 95 %) as a colorless oil.  $^1\text{H}$  NMR (400 MHz,  $\text{C}_6\text{D}_6$ ):  $\delta$  6.96 (m, 2H, Ar-*H*), 6.74 (m, 2H, Ar-*H*), 3.93–3.81 (m, 2H,  $\text{SiH}_2$ ), 3.38 (s, 3H, ArO-Me), 2.24 (m, 1H, CH), 1.35 (d,  $^3J_{\text{H-H}} = 7.5$  Hz, 3H, CH-Me), 1.28–1.10 (m, 8H,  $\text{CH}_2$ ), 0.84 (t,  $^3J_{\text{H-H}} = 6.6$  Hz, 3H,  $\text{CH}_2$ -Me), 0.55 (d,  $^3J_{\text{H-H}} = 2.4$  Hz, 2H,  $\text{CH}_2\text{Si}$ ).  $^{13}\text{C}$  NMR (101 MHz,  $\text{C}_6\text{D}_6$ ):  $\delta$  157.7, 137.1, 127.8, 114.2 (Ar-C), 54.6 (ArO-Me), 32.8 ( $\text{CH}_2$ ), 31.7 ( $\text{CH}_2$ ), 25.4 ( $\text{CH}_2$ ), 23.5 (CH-Me), 22.8 ( $\text{CH}_2$ ), 17.3 ( $\text{CHSi}$ ), 14.2 ( $\text{CH}_2$ -Me), 8.4 ( $\text{CH}_2\text{Si}$ ).  $^{29}\text{Si}$  NMR (79 MHz,  $\text{C}_6\text{D}_6$ ):  $\delta$  -19.0 ( $\text{SiH}_2$ ). GC-MS (EI): Calcd for  $\text{C}_{15}\text{H}_{26}\text{OSi}$ : 250.18, found: 250.37.

**$\text{PhCH}_2\text{C}(\text{SiH}_2\text{C}_6\text{H}_{13})\text{CH}_3$  (5d)**

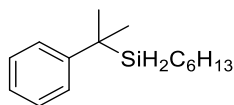

The reaction was carried out according to general method by using catalyst A (12.7 mg, 0.01 mmol), 2-Phenyl-1-propene (118 mg, 1.0 mmol) and hexylsilane (116 mg, 1.0 mmol) at 70 °C for 6 h and then the reaction mixture was concentrated in vacuum. The crude product was purified by column chromatography on silica gel with hexane as eluent. The title compound was isolated (215 mg, 92 %) as a colorless oil.  $^1\text{H}$  NMR (400 MHz,  $\text{C}_6\text{D}_6$ ):  $\delta$  7.21 (m, 2H, Ar-*H*), 7.16 (m, 2H, Ar-*H*), 7.00 (m, 1H, Ar-*H*), 3.86 (m, 2H,  $\text{SiH}_2$ ), 1.38 (s, 6H, Me), 1.22–1.09 (m, 8H,  $\text{CH}_2$ ), 0.84 (m, 3H,  $\text{CH}_2$ -Me), 0.49 (m, 2H,  $\text{CH}_2\text{Si}$ ).  $^{13}\text{C}$  NMR (101 MHz,  $\text{C}_6\text{D}_6$ ):  $\delta$  148.3, 128.4, 125.8, 124.9 (Ar-C), 32.8 ( $\text{CH}_2$ ), 31.7 ( $\text{CH}_2$ ), 25.9 ( $\text{CH}_2$ ), 25.4 (Me), 25.3 ( $\text{Me}_2\text{-C}$ ), 22.8 ( $\text{CH}_2$ ), 14.2 ( $\text{CH}_2$ -Me), 8.1 ( $\text{CH}_2\text{Si}$ ).  $^{29}\text{Si}$  NMR (79 MHz,  $\text{C}_6\text{D}_6$ ):  $\delta$  -10.21 ( $\text{SiH}_2$ ). GC-MS (EI): Calcd for  $\text{C}_{15}\text{H}_{26}\text{Si}$ : 234.18, found: 234.27.

**$\text{Ph}_2\text{C}(\text{CH}_3)\text{SiH}_2\text{C}_6\text{H}_{13}$  (5e)**

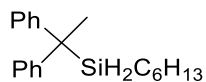

The reaction was carried out according to general method by using catalyst A (12.7 mg, 0.01 mmol), 1,1-Diphenylethylene (180 mg, 1.0 mmol) and hexylsilane (116 mg, 1.0 mmol) at 70 °C for 8 h and then the reaction mixture was concentrated in vacuum. The crude product was purified by column chromatography on silica gel with hexane as eluent. The title compound was isolated (276 mg, 93 %) as a colorless oil.  $^1\text{H}$  NMR (400 MHz,  $\text{C}_6\text{D}_6$ ):  $\delta$  7.28–7.19 (m, 4H, Ar-*H*), 7.14–7.09 (m, 4H, Ar-*H*), 7.01 (m, 2H, Ar-*H*), 4.24 (m, 2H,  $\text{SiH}_2$ ), 1.70 (s, 3H,  $\text{Ph}_2\text{C-Me}$ ), 1.24–1.08 (m, 8H,  $\text{CH}_2$ ), 0.89–0.79 (m, 3H,  $\text{CH}_2$ -Me), 0.54

(d,  $^3J_{\text{H-H}} = 8.4$  Hz, 2H,  $\text{CH}_2\text{Si}$ ).  $^{13}\text{C}$  NMR (101 MHz,  $\text{C}_6\text{D}_6$ ):  $\delta$  148.30, 128.52, 128.17, 125.61 (Ar-C), 37.2 ( $\text{Ph}_2\text{-C}$ ), 32.7 ( $\text{CH}_2$ ), 31.7 ( $\text{CH}_2$ ), 26.3 ( $\text{CH}_2$ ), 25.5 ( $\text{Ph}_2\text{-C-Me}$ ), 22.8 ( $\text{CH}_2$ ), 14.3 ( $\text{CH}_2\text{-Me}$ ), 8.6 ( $\text{CH}_2\text{Si}$ ).  $^{29}\text{Si}$  NMR (79 MHz,  $\text{C}_6\text{D}_6$ ):  $\delta$  -15.3 ( $\text{SiH}_2$ ). GC-MS (EI): Calcd for  $\text{C}_{20}\text{H}_{28}\text{Si}$ : 296.20, found: 296.24.

#### [1-(2-Naphthyl)-1-ethyl](hexyl)silane (**5f**)

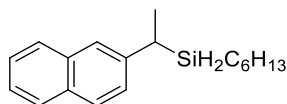

The reaction was carried out according to general method by using catalyst A (6.4 mg, 0.005 mmol), 2-Vinylnaphthalene (154 mg, 1.0 mmol) and hexylsilane (116 mg, 1.0 mmol) at 70 °C for 6 h and then the reaction mixture was concentrated in vacuum. The crude product was purified by column chromatography on silica gel with hexane as eluent. The title compound was isolated (251 mg, 93 %) as a colorless oil.  $^1\text{H}$  NMR (400 MHz,  $\text{CDCl}_3$ ):  $\delta$  7.70 (m, 3H, Ar-H), 7.51 (m, 1H, Ar-H), 7.39–7.33 (m, 2H, Ar-H), 7.25 (m, 1H, Ar-H), 3.81–3.71 (m, 2H,  $\text{SiH}_2$ ), 2.59–2.48 (m, 1H, CH), 1.50 (m, 3H, CH-Me), 1.27–1.16 (m, 8H,  $\text{CH}_2$ ), 0.83 (t,  $^3J_{\text{H-H}} = 6.9$  Hz, 3H,  $\text{CH}_2\text{-Me}$ ), 0.60 (m, 2H,  $\text{CH}_2\text{Si}$ ).  $^{13}\text{C}$  NMR (101 MHz,  $\text{CDCl}_3$ ):  $\delta$  142.08, 132.78, 130.45, 126.75, 126.50, 126.20, 125.41, 124.78, 123.66, 123.03 (Ar-C), 31.4 ( $\text{CH}_2$ ), 30.4 ( $\text{CH}_2$ ), 24.0 ( $\text{CH}_2$ ), 23.6 (CH-Me), 21.5 ( $\text{CH}_2$ ), 15.7 (CH), 13.0 ( $\text{CH}_2\text{-Me}$ ), 7.2 ( $\text{CH}_2\text{Si}$ ).  $^{29}\text{Si}$  NMR (79 MHz,  $\text{C}_6\text{D}_6$ ):  $\delta$  -21.4 ( $\text{SiH}_2$ ). GC-MS (EI): Calcd for  $\text{C}_{18}\text{H}_{26}\text{Si}$ : 270.18, found: 270.24.

#### Hexyl(3-phenylpropyl)silane (**5g**)

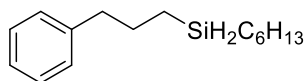

The reaction was carried out according to general method by using catalyst A (6.4 mg, 0.005 mmol), Allylbenzene (118 mg, 1.0 mmol) and hexylsilane (116 mg, 1.0 mmol) at 70 °C for 8 h and then the reaction mixture was concentrated in vacuum. The crude product was purified by column chromatography on silica gel with hexane as eluent. The title compound was isolated (223 mg, 95 %) as a colorless oil.  $^1\text{H}$  NMR (400 MHz,  $\text{C}_6\text{D}_6$ ):  $\delta$  7.14 (m, 2H, Ar-H), 7.04 (m, 3H, Ar-H), 3.90–3.78 (m, 2H,  $\text{SiH}_2$ ), 2.51 (m, 2H, Ar- $\text{CH}_2$ ), 1.63 (m, 2H, Ar $\text{CH}_2\text{-CH}_2$ ), 1.26 (m, 8H,  $\text{CH}_2$ ), 0.88 (t,  $^3J_{\text{H-H}} = 6.9$  Hz, 3H,  $\text{CH}_2\text{-Me}$ ), 0.65–0.53 (m, 4H,  $\text{CH}_2\text{Si}$ ).  $^{13}\text{C}$  NMR (101 MHz,  $\text{C}_6\text{D}_6$ ):  $\delta$  142.1, 128.6, 128.4, 125.9 (Ar-C), 39.3 (Ar- $\text{CH}_2$ ), 32.8 ( $\text{CH}_2$ ), 31.8 ( $\text{CH}_2$ ), 27.7 ( $\text{CH}_2$ ), 25.6 ( $\text{CH}_2$ ), 22.8 ( $\text{CH}_2$ ), 14.2 ( $\text{CH}_2\text{-Me}$ ), 9.3 ( $\text{CH}_2\text{Si}$ ), 9.0 ( $\text{CH}_2\text{Si}$ ).  $^{29}\text{Si}$  NMR (79 MHz,  $\text{C}_6\text{D}_6$ ):  $\delta$  -28.8 ( $\text{SiH}_2$ ). GC-MS (EI): Calcd for  $\text{C}_{15}\text{H}_{26}\text{Si}$ : 234.18, found: 234.28.

#### Hexyl(4-phenylbutyl)silane (**5h**)



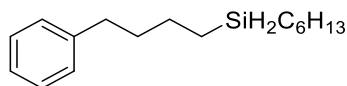

The reaction was carried out according to general method by using catalyst A (6.4 mg, 0.005 mmol), 4-Phenyl-1-butene (132 mg, 1.0 mmol) and hexylsilane (116 mg, 1.0 mmol) at 70 °C for 8 h and then the reaction mixture was concentrated in vacuum. The crude product was purified by column chromatography on silica gel with hexane as eluent. The title compound was isolated (236 mg, 95 %) as a colorless oil.  $^1\text{H}$  NMR (400 MHz,  $\text{C}_6\text{D}_6$ ):  $\delta$  7.18–7.10 (m, 2H, Ar-H), 7.04 (m, 3H, Ar-H), 3.86–3.78 (m, 2H,  $\text{SiH}_2$ ), 2.54–2.39 (m, 2H, Ar- $\text{CH}_2$ ), 1.63–1.50 (m, 2H,  $\text{CH}_2$ ), 1.32 (m, 10H,  $\text{CH}_2$ ), 0.87 (m, 3H,  $\text{CH}_2$ -Me), 0.61 (d,  $^3J_{\text{H-H}} = 7.6$  Hz, 4H,  $\text{CH}_2\text{Si}$ ).  $^{13}\text{C}$  NMR (101 MHz,  $\text{C}_6\text{D}_6$ ):  $\delta$  142.4, 128.5, 128.3, 125.8 (Ar-C), 35.8 ( $\text{CH}_2$ ), 34.9 ( $\text{CH}_2$ ), 32.9 ( $\text{CH}_2$ ), 31.8 ( $\text{CH}_2$ ), 25.7 ( $\text{CH}_2$ ), 25.3 ( $\text{CH}_2$ ), 22.8 ( $\text{CH}_2$ ), 14.2 ( $\text{CH}_2$ -Me), 9.3 ( $\text{CH}_2\text{Si}$ ), 9.2 ( $\text{CH}_2\text{Si}$ ).  $^{29}\text{Si}$  NMR (79 MHz,  $\text{C}_6\text{D}_6$ ):  $\delta$  -28.9 ( $\text{SiH}_2$ ). GC-MS (EI): Calcd for  $\text{C}_{16}\text{H}_{28}\text{Si}$ : 248.20, found: 248.29.

#### (2-Cyclohexylethyl)(hexyl)silane (**5i**)

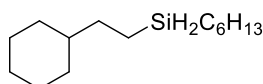

The reaction was carried out according to general method by using catalyst A (12.7 mg, 0.01 mmol), Vinylcyclohexane (110 mg, 1.0 mmol) and hexylsilane (116 mg, 1.0 mmol) at 70 °C for 8 h and then the reaction mixture was concentrated in vacuum. The crude product was purified by column chromatography on silica gel with hexane as eluent. The title compound was isolated (208 mg, 92 %) as a colorless oil.  $^1\text{H}$  NMR (400 MHz,  $\text{CDCl}_3$ ):  $\delta$  3.72 (s, 2H,  $\text{SiH}_2$ ), 1.77 (m, 5H,  $\text{CH}_2$ , CH), 1.32 (m, 14H,  $\text{CH}_2$ ), 0.96 (m, 5H,  $\text{CH}_2$ ,  $\text{CH}_2$ -Me), 0.74 (m, 4H,  $\text{CH}_2\text{Si}$ ).  $^{13}\text{C}$  NMR (101 MHz,  $\text{CDCl}_3$ ):  $\delta$  40.4 (CH), 33.1 ( $\text{CH}_2$ ), 33.0 ( $\text{CH}_2$ ), 32.7 ( $\text{CH}_2$ ), 31.6 ( $\text{CH}_2$ ), 26.8 ( $\text{CH}_2$ ), 26.5 ( $\text{CH}_2$ ), 25.5 ( $\text{CH}_2$ ), 22.7 ( $\text{CH}_2$ ), 14.1 ( $\text{CH}_2$ -Me), 9.2 ( $\text{CH}_2\text{Si}$ ), 6.3 ( $\text{CH}_2\text{Si}$ ).  $^{29}\text{Si}$  NMR (79 MHz,  $\text{CDCl}_3$ ):  $\delta$  -27.8 ( $\text{SiH}_2$ ). GC-MS (EI): Calcd for  $\text{C}_{14}\text{H}_{30}\text{Si}$ : 226.21, found: 226.29.

#### 4-[2-(Hexylsilyl)ethyl]cyclohex-1-ene (**5j**)

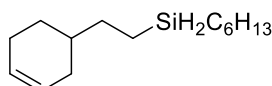

The reaction was carried out according to general method by using catalyst A (12.7 mg, 0.01 mmol), 4-Vinylcyclohexene (108 mg, 1.0 mmol) and hexylsilane (116 mg, 1.0 mmol) at 70 °C for 8 h and then the reaction mixture was concentrated in vacuum. The crude product was purified by column chromatography on silica gel with hexane as eluent. The title compound was isolated (213 mg, 95 %) as a

colorless oil.  $^1\text{H}$  NMR (400 MHz,  $\text{CDCl}_3$ ):  $\delta$  5.70 (s, 2H,  $\text{CH}=\text{CH}$ ), 3.72 (s, 2H,  $\text{SiH}_2$ ), 2.25–2.02 (m, 4H,  $\text{CH}_2$ ), 1.74 (m, 1H,  $\text{CH}$ ), 1.52–1.26 (m, 12H,  $\text{CH}_2$ ), 0.94 (s, 3H,  $\text{CH}_2\text{-Me}$ ), 0.74 (s, 4H,  $\text{CH}_2\text{Si}$ ).  $^{13}\text{C}$  NMR (101 MHz,  $\text{CDCl}_3$ ):  $\delta$  127.0, 126.5 ( $\text{CH}=\text{CH}$ ), 36.2 ( $\text{CH}$ ), 32.7 ( $\text{CH}_2$ ), 32.3 ( $\text{CH}_2$ ), 31.6 ( $\text{CH}_2$ ), 28.5 ( $\text{CH}_2$ ), 25.5 ( $\text{CH}_2$ ), 25.3 ( $\text{CH}_2$ ), 22.6 ( $\text{CH}_2$ ), 14.1 (Me), 9.2 ( $\text{CH}_2\text{Si}$ ), 6.3 ( $\text{CH}_2\text{Si}$ ).  $^{29}\text{Si}$  NMR (79 MHz,  $\text{CDCl}_3$ ):  $\delta$  -27.8 ( $\text{SiH}_2$ ). GC-MS (EI): Calcd for  $\text{C}_{14}\text{H}_{28}\text{Si}$ : 224.20, found: 224.28.

### (1-Hexyl)(hexyl)silane (**5k**)

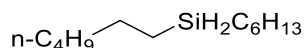

The reaction was carried out according to general method by using catalyst A (12.7 mg, 0.01 mmol), 1-Hexene (84 mg, 1.0 mmol) and hexylsilane (116 mg, 1.0 mmol) at 70 °C for 8 h and then the reaction mixture was concentrated in vacuum. The crude product was purified by column chromatography on silica gel with hexane as eluent. The title compound was isolated (191 mg, 95 %) as a colorless oil.  $^1\text{H}$  NMR (400 MHz,  $\text{CDCl}_3$ ):  $\delta$  3.71 (s, 2H,  $\text{SiH}_2$ ), 1.38 (m, 16H,  $\text{CH}_2$ ), 0.95 (m, 6H,  $\text{CH}_2\text{-Me}$ ), 0.73 (m, 4H,  $\text{CH}_2\text{Si}$ ).  $^{13}\text{C}$  NMR (101 MHz,  $\text{CDCl}_3$ ):  $\delta$  32.7 ( $\text{CH}_2$ ), 31.6 ( $\text{CH}_2$ ), 25.5 ( $\text{CH}_2$ ), 22.6 ( $\text{CH}_2$ ), 14.1 (Me), 9.20 ( $\text{CH}_2\text{Si}$ ).  $^{29}\text{Si}$  NMR (79 MHz,  $\text{C}_6\text{D}_6$ ):  $\delta$  -28.9 ( $\text{SiH}_2$ ). GC-MS (EI): Calcd for  $\text{C}_{12}\text{H}_{28}\text{Si}$ : 200.20, found: 200.29.

### (1-Octyl)(hexyl)silane (**5l**)

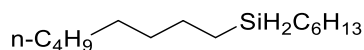

The reaction was carried out according to general method by using catalyst A (12.7 mg, 0.01 mmol), 1-Octene (112 mg, 1.0 mmol) and hexylsilane (116 mg, 1.0 mmol) at 70 °C for 8 h and then the reaction mixture was concentrated in vacuum. The crude product was purified by column chromatography on silica gel with hexane as eluent. The title compound was isolated (217 mg, 95 %) as a colorless oil.  $^1\text{H}$  NMR (400 MHz,  $\text{CDCl}_3$ ):  $\delta$  3.70 (s, 2H,  $\text{SiH}_2$ ), 1.32 (m, 20H,  $\text{CH}_2$ ), 0.93 (m, 6H,  $\text{CH}_2\text{-Me}$ ), 0.72 (m, 4H,  $\text{CH}_2\text{Si}$ ).  $^{13}\text{C}$  NMR (101 MHz,  $\text{CDCl}_3$ ):  $\delta$  33.0 ( $\text{CH}_2$ ), 32.6 ( $\text{CH}_2$ ), 31.9 ( $\text{CH}_2$ ), 31.6 ( $\text{CH}_2$ ), 29.3 ( $\text{CH}_2$ ), 29.3 ( $\text{CH}_2$ ), 25.5 ( $\text{CH}_2$ ), 22.7 ( $\text{CH}_2$ ), 22.6 ( $\text{CH}_2$ ), 14.1 ( $\text{CH}_2\text{-Me}$ ), 9.2 ( $\text{CH}_2\text{Si}$ ).  $^{29}\text{Si}$  NMR (79 MHz,  $\text{C}_6\text{D}_6$ ):  $\delta$  -28.9 ( $\text{SiH}_2$ ). GC-MS (EI): Calcd for  $\text{C}_{14}\text{H}_{32}\text{Si}$ : 228.23, found: 228.33.

### 1,6-Bis(hexylsilyl)hexane (**5m**)

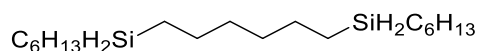

The reaction was carried out according to general method by using catalyst A (12.7 mg, 0.01 mmol), 1,5-Hexadiene (82 mg, 1.0 mmol) and hexylsilane (232 mg, 2.0 mmol) at 70 °C for 8 h and then the reaction mixture was concentrated in vacuum. The crude product was purified by column chromatography on silica gel with hexane as eluent. The title compound was isolated (285 mg, 90 %) as a colorless oil.  $^1\text{H}$  NMR (400 MHz,  $\text{CDCl}_3$ ):  $\delta$  3.71 (s, 4H,  $\text{SiH}_2$ ), 1.40 (m, 24H,  $\text{CH}_2$ ), 0.94 (s, 6H,  $\text{CH}_2\text{-Me}$ ), 0.73 (s, 8H,  $\text{CH}_2\text{Si}$ ).  $^{13}\text{C}$  NMR (101 MHz,  $\text{CDCl}_3$ ):  $\delta$  32.7 ( $\text{CH}_2$ ), 32.6 ( $\text{CH}_2$ ), 31.6 ( $\text{CH}_2$ ), 25.5 ( $\text{CH}_2$ ), 25.4 ( $\text{CH}_2$ ), 22.6 ( $\text{CH}_2$ ), 14.1 ( $\text{CH}_2\text{-Me}$ ), 9.2 ( $\text{CH}_2\text{Si}$ ).  $^{29}\text{Si}$  NMR (79 MHz,  $\text{CDCl}_3$ ):  $\delta$  -28.6 ( $\text{SiH}_2$ ). GC-MS (EI): Calcd for  $\text{C}_{18}\text{H}_{42}\text{Si}$ : 314.28, found: 314.37.

### Cyclohexyl(1-phenylethyl)silane (**6a**)

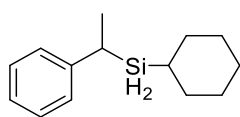

The reaction was carried out according to general method by using catalyst A (12.7 mg, 0.01 mmol), styrene (104 mg, 1.0 mmol) and cyclohexylsilane (114 mg, 1.0 mmol) at 70 °C for 5 h and then the resulting solution was concentrated in vacuum. The crude product was purified by column chromatography on silica gel with hexane as eluent. The title compound was isolated (207 mg, 95 %) as a colorless oil.  $^1\text{H}$  NMR (400 MHz,  $\text{CDCl}_3$ ):  $\delta$  7.40 (m, 2H, Ar-*H*), 7.30–7.21 (m, 3H, Ar-*H*), 3.77 (m, 1H,  $\text{SiHH}$ ), 3.72 (m, 1H,  $\text{SiHH}$ ), 2.63–2.53 (m, 1H, Ar-*CH*), 1.86–1.72 (m, 5H,  $\text{CH}_2$ ), 1.63–1.54 (m, 3H,  $\text{CH-Me}$ ), 1.40–1.27 (m, 5H,  $\text{CH}_2$ ), 1.04–0.92 (m, 1H,  $\text{CHSi}$ ).  $^{13}\text{C}$  NMR (101 MHz,  $\text{CDCl}_3$ ):  $\delta$  145.8, 128.5, 127.0, 124.9 (Ar-C), 29.3 ( $\text{CH}_2$ ), 27.8 ( $\text{CH}_2$ ), 26.7 ( $\text{CH}_2$ ), 23.7 ( $\text{CH}_2\text{-Me}$ ), 20.9 ( $\text{CHSi}$ ), 17.5 (Ar-*CH*).  $^{29}\text{Si}$  NMR (79 MHz,  $\text{CDCl}_3$ ):  $\delta$  -11.4 ( $\text{SiH}_2$ ). GC-MS (EI): Calcd for  $\text{C}_{14}\text{H}_{22}\text{Si}$ : 218.15, found: 218.24.

### Cyclohexyl(1-(*p*-tolyl)ethyl)silane (**6b**)

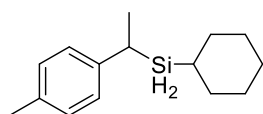

The reaction was carried out according to general method by using catalyst A (12.7 mg, 0.01 mmol), 4-methylstyrene (118 mg, 1.0 mmol) and cyclohexylsilane (114 mg, 1.0 mmol) at 70 °C for 5 h and then the resulting solution was concentrated in vacuum. The crude product was purified by column chromatography on silica gel with hexane as eluent. The title compound was isolated (220 mg, 95 %) as a colorless oil.  $^1\text{H}$  NMR (400 MHz,  $\text{CDCl}_3$ ):  $\delta$  7.34–7.11 (m, 4H, Ar-*H*), 3.78 (m, 2H,  $\text{SiH}_2$ ), 2.65–2.54 (m, 1H, Ar-*CH*), 2.48 (s, 3H, Ar-Me), 1.84 (s, 5H,  $\text{CH}_2$ ), 1.60 (d,  $^3J_{\text{H-H}} = 7.3$  Hz,  $\text{CH-Me}$ ), 1.38 (s, 5H,  $\text{CH}_2$ ), 1.03 (s, 1H,  $\text{CHSi}$ ).  $^{13}\text{C}$  NMR (101 MHz,  $\text{CDCl}_3$ ):  $\delta$  142.7, 134.2, 129.2, 126.9 (Ar-C), 29.3 ( $\text{CH}_2$ ), 27.8 ( $\text{CH}_2$ ), 26.8 ( $\text{CH}_2$ ),

23.1 (Ar-Me), 21.1 (Me), 21.0 (CHSi), 17.7 (Ar-CH).  $^{29}\text{Si}$  NMR (79 MHz,  $\text{CDCl}_3$ ):  $\delta$  -11.5 ( $\text{SiH}_2$ ). GC-MS (EI): Calcd for  $\text{C}_{15}\text{H}_{24}\text{Si}$ : 232.16, found: 232.22.

**(1-(4-Methoxyphenyl)ethyl)(cyclohexyl)silane (6c)**

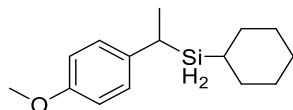

The reaction was carried out according to general method by using catalyst A (12.7 mg, 0.01 mmol), 4-methoxystyrene (134 mg, 1.0 mmol) and cyclohexylsilane (114 mg, 1.0 mmol) at 80 °C for 6 h and then the resulting solution was concentrated in vacuum. The crude product was purified by column chromatography on silica gel with hexane as eluent. The title compound was isolated (235 mg, 95 %) as a colorless oil.  $^1\text{H}$  NMR (400 MHz,  $\text{CDCl}_3$ ):  $\delta$  6.98–6.90 (m, 2H, Ar-*H*), 6.75–6.67 (m, 2H, Ar-*H*), 3.64 (s, 3H, ArO-Me), 3.52 (m, 1H, SiHH), 3.46 (m, 1H, SiHH), 2.27 (m, 1H, ArCH), 1.63–1.50 (m, 5H,  $\text{CH}_2$ ), 1.35–1.26 (m, 3H, CH-Me), 1.14–1.01 (m, 5H,  $\text{CH}_2$ ), 0.75 (m, 1H, CHSi).  $^{13}\text{C}$  NMR (101 MHz,  $\text{CDCl}_3$ ):  $\delta$  156.0, 136.5, 126.7, 112.8 (Ar-C), 54.04 (ArO-Me), 28.10 ( $\text{CH}_2$ ), 26.6 ( $\text{CH}_2$ ), 25.6 ( $\text{CH}_2$ ), 21.4 (Me), 19.8 (CHSi), 16.7 (Ar-CH).  $^{29}\text{Si}$  NMR (79 MHz,  $\text{CDCl}_3$ ):  $\delta$  -12.0 ( $\text{SiH}_2$ ). GC-MS (EI): Calcd for  $\text{C}_{15}\text{H}_{24}\text{OSi}$ : 248.16, found: 248.22.

**$\text{PhCH}_2\text{C}(\text{SiH}_2\text{C}_6\text{H}_{11})\text{CH}_3$  (6d)**

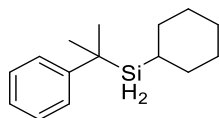

The reaction was carried out according to general method by using catalyst A (12.7 mg, 0.01 mmol), 2-Phenyl-1-propene (118 mg, 1.0 mmol) and cyclohexylsilane (114 mg, 1.0 mmol) at 90 °C for 8 h and then the resulting solution was concentrated in vacuum. The crude product was purified by column chromatography on silica gel with hexane as eluent. The title compound was isolated (210 mg, 90 %) as a colorless oil.  $^1\text{H}$  NMR (400 MHz,  $\text{CDCl}_3$ ):  $\delta$  7.51–7.44 (m, 4H, Ar-*H*), 7.34–7.27 (m, 1H, Ar-*H*), 3.84 (m, 2H,  $\text{SiH}_2$ ), 1.80 (m, 3H, Me), 1.74–1.63 (m, 8H,  $\text{CH}_2$ , Me), 1.32 (m, 5H,  $\text{CH}_2$ ), 1.06–0.97 (m, 1H, CHSi).  $^{13}\text{C}$  NMR (101 MHz,  $\text{CDCl}_3$ ):  $\delta$  147.4, 127.0, 124.7, 123.6 (Ar-C), 28.5 ( $\text{CH}_2$ ), 26.5 ( $\text{CH}_2$ ), 25.5 ( $\text{CH}_2$ ), 25.3 (Me), 24.8 (Me<sub>2</sub>-C), 19.9 (CHSi).  $^{29}\text{Si}$  NMR (79 MHz,  $\text{CDCl}_3$ ):  $\delta$  -3.31 ( $\text{SiH}_2$ ). GC-MS (EI): Calcd for  $\text{C}_{15}\text{H}_{24}\text{Si}$ : 232.16, found: 232.24.

**$\text{Ph}_2\text{C}(\text{CH}_3)\text{SiH}_2\text{C}_6\text{H}_{11}$  (6e)**

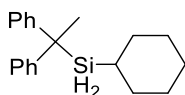

The reaction was carried out according to general method by using catalyst A (12.7 mg, 0.01 mmol), 1,1-Diphenylethylene (180 mg, 1.0 mmol) and cyclohexylsilane (114 mg, 1.0 mmol) at 90 °C for 8 h and then the resulting solution was concentrated in vacuum. The crude product was purified by column chromatography on silica gel with hexane as eluent. The title compound was isolated (265 mg, 90 %) as a colorless oil.  $^1\text{H}$  NMR (400 MHz,  $\text{CDCl}_3$ ):  $\delta$  7.52 (m, 8H, Ar-H), 7.41 (m, 2H, Ar-H), 4.30 (m, 2H,  $\text{SiH}_2$ ), 2.09 (s, 3H, Me), 1.88–1.75 (m, 5H,  $\text{CH}_2$ ), 1.45 (m, 5H,  $\text{CH}_2$ ), 1.11 (s, 1H, CHSi).  $^{13}\text{C}$  NMR (101 MHz,  $\text{CDCl}_3$ ):  $\delta$ : 146.9, 127.1, 126.8, 124.2 (Ar-C), 43.6 ( $\text{Ph}_2\text{C}$ ), 36.1 ( $\text{CH}_2$ ), 28.7 ( $\text{CH}_2$ ), 26.5 ( $\text{CH}_2$ ), 25.2 (Me), 20.0 (CHSi).  $^{29}\text{Si}$  NMR (79 MHz,  $\text{CDCl}_3$ ):  $\delta$  -7.93 ( $\text{SiH}_2$ ). GC-MS (EI): Calcd for  $\text{C}_{20}\text{H}_{26}\text{Si}$ : 294.18, found: 294.24.

#### [1-(2-Naphthyl)-1-ethyl](cyclohexyl)silane (**6f**)

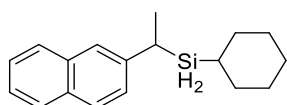

The reaction was carried out according to general method by using catalyst A (12.7 mg, 0.01 mmol), 2-Vinylnaphthalene (154 mg, 1.0 mmol) and cyclohexylsilane (114 mg, 1.0 mmol) at 90 °C for 8 h and then the resulting solution was concentrated in vacuum. The crude product was purified by column chromatography on silica gel with hexane as eluent. The title compound was isolated (241 mg, 90 %) as a colorless oil.  $^1\text{H}$  NMR (400 MHz,  $\text{CDCl}_3$ ):  $\delta$  7.93–7.87 (m, 3H, Ar-H), 7.71 (m, 1H, Ar-H), 7.57 (m, 2H, Ar-H), 7.45 (m, 1H, Ar-H), 3.88–3.76 (m, 2H,  $\text{SiH}_2$ ), 2.76 (m, 1H, CH), 1.91–1.76 (m, 5H,  $\text{CH}_2$ ), 1.70 (m, 3H, Me), 1.43–1.36 (m, 5H,  $\text{CH}_2$ ), 1.04 (s, 1H, CHSi).  $^{13}\text{C}$  NMR (101 MHz,  $\text{CDCl}_3$ ):  $\delta$  142.4, 132.8, 130.4, 126.7, 126.5, 126.2, 125.5, 124.8, 123.7, 123.2 (Ar-C), 28.12 ( $\text{CH}_2$ ), 26.51 ( $\text{CH}_2$ ), 25.5 ( $\text{CH}_2$ ), 22.8 (Me), 19.8 (CHSi), 16.36 (Ar-CH).  $^{29}\text{Si}$  NMR (79 MHz,  $\text{CDCl}_3$ ):  $\delta$  -11.6 ( $\text{SiH}_2$ ). GC-MS (EI): Calcd for  $\text{C}_{18}\text{H}_{24}\text{Si}$ : 268.16, found: 268.24.

#### Cyclohexyl(3-phenylpropyl)silane (**5g**)

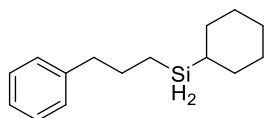

The reaction was carried out according to general method by using catalyst A (12.7 mg, 0.01 mmol), Allylbenzene (118 mg, 1.0 mmol) and cyclohexylsilane (114 mg, 1.0 mmol) at 90 °C for 8 h and then the resulting solution was concentrated in vacuum. The crude product was purified by column chromatography on silica gel with hexane as eluent. The title compound was isolated (210 mg, 90 %) as a colorless oil.  $^1\text{H}$  NMR (400 MHz,  $\text{CDCl}_3$ ):  $\delta$  7.36 (m, 2H, Ar-H), 7.30–7.21 (m, 3H, Ar-H), 3.63 (s, 2H,  $\text{SiH}_2$ ), 2.73 (m, 2H,  $\text{CH}_2$ ), 1.80 (m, 7H,  $\text{CH}_2$ ), 1.29 (m, 5H,  $\text{CH}_2$ ), 1.00–0.93 (m, 1H, CHSi), 0.80 (s, 2H,  $\text{CH}_2\text{Si}$ ).  $^{13}\text{C}$  NMR (101 MHz,  $\text{CDCl}_3$ ):  $\delta$  142.4, 128.6, 128.3, 125.7 (Ar-C), 39.2 (Ar- $\text{CH}_2$ ), 29.3 ( $\text{CH}_2$ ), 27.8 ( $\text{CH}_2$ ), 27.7

(CH<sub>2</sub>), 26.7 (CH<sub>2</sub>), 21.2 (CHSi), 7.62 (CH<sub>2</sub>Si). <sup>29</sup>Si NMR (79 MHz, CDCl<sub>3</sub>): δ -22.3 (SiH<sub>2</sub>). GC-MS (EI): Calcd for C<sub>15</sub>H<sub>24</sub>Si: 232.16, found: 232.22.

#### Cyclohexyl(4-phenylbutyl)silane (**6h**)

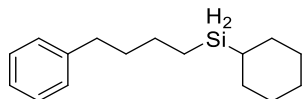

The reaction was carried out according to general method by using catalyst A (12.7 mg, 0.01 mmol), 4-Phenyl-1-butene (132 mg, 1.0 mmol) and cyclohexylsilane (114 mg, 1.0 mmol) at 90 °C for 8 h and then the resulting solution was concentrated in vacuum. The crude product was purified by column chromatography on silica gel with hexane as eluent. The title compound was isolated (222 mg, 90 %) as a colorless oil. <sup>1</sup>H NMR (400 MHz, CDCl<sub>3</sub>): δ 7.40 (m, 2H, Ar-*H*), 7.31 (m, 3H, Ar-*H*), 3.69 (s, 2H, SiH<sub>2</sub>), 2.75 (s, 2H, Ar-CH<sub>2</sub>), 1.84 (m, 7H, CH<sub>2</sub>), 1.59 (s, 2H, CH<sub>2</sub>), 1.38 (s, 5H, CH<sub>2</sub>), 1.02 (m, 1H, CHSi), 0.85 (s, 2H, CH<sub>2</sub>Si). <sup>13</sup>C NMR (101 MHz, CDCl<sub>3</sub>): δ 142.7, 128.5, 128.3, 125.7 (Ar-C), 35.8 (Ar-CH<sub>2</sub>), 34.8 (CH<sub>2</sub>), 29.4 (CH<sub>2</sub>), 27.8 (CH<sub>2</sub>), 26.8 (CH<sub>2</sub>), 25.5 (CH<sub>2</sub>), 21.3 (CHSi), 7.7 (CH<sub>2</sub>Si). <sup>29</sup>Si NMR (79 MHz, CDCl<sub>3</sub>): δ -22.1 (SiH<sub>2</sub>). GC-MS (EI): Calcd for C<sub>16</sub>H<sub>26</sub>Si: 246.18, found: 246.24.

#### (2-Cyclohexylethyl)(cyclohexyl)silane (**6i**)

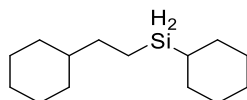

The reaction was carried out according to general method by using catalyst A (12.7 mg, 0.01 mmol), Vinylcyclohexane (110 mg, 1.0 mmol) and cyclohexylsilane (114 mg, 1.0 mmol) at 90 °C for 8 h and then the resulting solution was concentrated in vacuum. The crude product was purified by column chromatography on silica gel with hexane as eluent. The title compound was isolated (208 mg, 93 %) as a colorless oil. <sup>1</sup>H NMR (400 MHz, CDCl<sub>3</sub>): δ 3.56 (s, 2H, SiH<sub>2</sub>), 1.75 (s, 10H, CH<sub>2</sub>), 1.26 (m, 11H, CH<sub>2</sub>, CH), 0.96–0.80 (m, 3H, CH<sub>2</sub>, CHSi), 0.69 (s, 2H, CH<sub>2</sub>Si). <sup>13</sup>C NMR (101 MHz, CDCl<sub>3</sub>): δ 39.4 (CH), 32.2 (CH<sub>2</sub>), 31.9 (CH<sub>2</sub>), 28.2 (CH<sub>2</sub>), 26.7 (CH<sub>2</sub>), 25.8 (CH<sub>2</sub>), 25.7 (CH<sub>2</sub>), 25.4 (CH<sub>2</sub>), 20.2 (CHSi), 3.79 (CH<sub>2</sub>Si). <sup>29</sup>Si NMR (79 MHz, CDCl<sub>3</sub>): δ -21.2 (SiH<sub>2</sub>). GC-MS (EI): Calcd for C<sub>14</sub>H<sub>28</sub>Si: 224.20, found: 224.26

#### 4-[2-(Cyclohexylsilyl)ethyl]cyclohex-1-ene (**6j**)

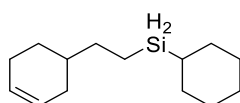

The reaction was carried out according to general method by using catalyst A (12.7 mg, 0.01 mmol), 4-Vinylcyclohexene (108 mg, 1.0 mmol) and cyclohexylsilane (114 mg, 1.0 mmol) at 90 °C for 8 h and then the resulting solution was concentrated in vacuum. The crude product was purified by column chromatography on silica gel with hexane as eluent. The title compound was isolated (206 mg, 93 %) as a colorless oil.  $^1\text{H}$  NMR (400 MHz,  $\text{CDCl}_3$ ):  $\delta$  5.69 (s, 2H,  $\text{CH}=\text{CH}$ ), 3.57 (m, 2H,  $\text{SiH}_2$ ), 2.21–2.02 (m, 3H,  $\text{CH}_2$ , CH), 1.80 (m, 2H,  $\text{CH}_2$ ), 1.77–1.61 (m, 5H,  $\text{CH}_2$ ), 1.57–1.48 (m, 1H, CH), 1.43–1.36 (m, 2H,  $\text{CH}_2$ ), 1.31–1.18 (m, 6H,  $\text{CH}_2$ ), 0.94 (m, 1H,  $\text{CHSi}$ ), 0.73 (m, 2H,  $\text{CH}_2\text{Si}$ ).  $^{13}\text{C}$  NMR (101 MHz,  $\text{CDCl}_3$ ):  $\delta$  126.0, 125.5 ( $\text{CH}=\text{CH}$ ), 35.2 (CH), 31.4 ( $\text{CH}_2$ ), 30.6 ( $\text{CH}_2$ ), 28.2 ( $\text{CH}_2$ ), 27.4 ( $\text{CH}_2$ ), 26.7 ( $\text{CH}_2$ ), 25.7 ( $\text{CH}_2$ ), 24.3 ( $\text{CH}_2$ ), 20.2 ( $\text{CHSi}$ ), 3.8 ( $\text{CH}_2\text{Si}$ ).  $^{29}\text{Si}$  NMR (79 MHz,  $\text{CDCl}_3$ ):  $\delta$  -21.3 ( $\text{SiH}_2$ ). GC-MS (EI): Calcd for  $\text{C}_{14}\text{H}_{26}\text{Si}$ : 222.18, found: 222.30.

### (1-Hexyl)(cyclohexyl)silane (**6k**)

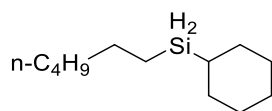

The reaction was carried out according to general method by using catalyst A (12.7 mg, 0.01 mmol), 1-Hexene (84 mg, 1.0 mmol) and cyclohexylsilane (114 mg, 1.0 mmol) at 90 °C for 8 h and then the resulting solution was concentrated in vacuum. The crude product was purified by column chromatography on silica gel with hexane as eluent. The title compound was isolated (188 mg, 95 %) as a colorless oil.  $^1\text{H}$  NMR (400 MHz,  $\text{CDCl}_3$ ):  $\delta$  3.57 (m, 2H,  $\text{SiH}_2$ ), 1.77 (m, 5H,  $\text{CH}_2$ ), 1.33 (m, 13H,  $\text{CH}_2$ ), 0.93 (m, 4H, Me,  $\text{CHSi}$ ), 0.70 (m, 2H,  $\text{CH}_2\text{Si}$ ).  $^{13}\text{C}$  NMR (101 MHz,  $\text{CDCl}_3$ ):  $\delta$  32.7 ( $\text{CH}_2$ ), 31.5 ( $\text{CH}_2$ ), 29.3 ( $\text{CH}_2$ ), 27.8 ( $\text{CH}_2$ ), 26.7 ( $\text{CH}_2$ ), 25.6 ( $\text{CH}_2$ ), 22.6 ( $\text{CH}_2$ ), 21.2 ( $\text{CHSi}$ ), 14.1 (Me), 7.7 ( $\text{CH}_2\text{Si}$ ).  $^{29}\text{Si}$  NMR (79 MHz,  $\text{CDCl}_3$ ):  $\delta$  -22.1 ( $\text{SiH}_2$ ). GC-MS (EI): Calcd for  $\text{C}_{12}\text{H}_{26}\text{Si}$ : 198.18, found: 198.24.

### (1-Octyl)(hexyl)silane (**6l**)

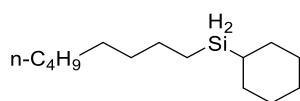

The reaction was carried out according to general method by using catalyst A (12.7 mg, 0.01 mmol), 1-Octene (112 mg, 1.0 mmol) and cyclohexylsilane (114 mg, 1.0 mmol) at 90 °C for 8 h and then the resulting solution was concentrated in vacuum. The crude product was purified by column chromatography on silica gel with hexane as eluent. The title compound was isolated (215 mg, 95 %) as a colorless oil.  $^1\text{H}$  NMR (400 MHz,  $\text{CDCl}_3$ ):  $\delta$  3.56 (m, 2H,  $\text{SiH}_2$ ), 1.76 (m, 5H,  $\text{CH}_2$ ), 1.44–1.21 (m, 17H,  $\text{CH}_2$ ), 0.92 (m, 4H, Me,  $\text{CHSi}$ ), 0.74–0.66 (m, 2H,  $\text{CH}_2\text{Si}$ ).  $^{13}\text{C}$  NMR (101 MHz,  $\text{CDCl}_3$ ):  $\delta$  33.0 ( $\text{CH}_2$ ), 31.9 ( $\text{CH}_2$ ), 29.3

(CH<sub>2</sub>), 29.2 (CH<sub>2</sub>), 27.7 (CH<sub>2</sub>), 26.7 (CH<sub>2</sub>), 25.6 (CH<sub>2</sub>), 22.7 (CH<sub>2</sub>), 21.2 (CHSi), 14.1 (Me), 7.7 (CH<sub>2</sub>Si). <sup>29</sup>Si NMR (79 MHz, CDCl<sub>3</sub>): δ -22.1 (SiH<sub>2</sub>). GC-MS (EI): Calcd for C<sub>14</sub>H<sub>30</sub>Si: 226.21, found: 226.28.

### 1,6-Bis(cyclohexylsilyl)hexane (**6m**)

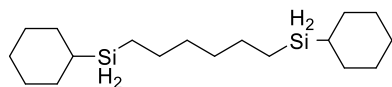

The reaction was carried out according to general method by using catalyst A (12.7 mg, 0.01 mmol), 1,5-Hexadiene (82 mg, 1.0 mmol) and cyclohexylsilane (228 mg, 2.0 mmol) at 90 °C for 8 h and then the resulting solution was concentrated in vacuum. The crude product was purified by column chromatography on silica gel with hexane as eluent. The title compound was isolated (249 mg, 80 %) as a colorless oil. <sup>1</sup>H NMR (400 MHz, CDCl<sub>3</sub>): δ 3.56 (s, 4H, SiH<sub>2</sub>), 1.76 (m, 10H, CH<sub>2</sub>), 1.40 (m, 8H, CH<sub>2</sub>), 1.25 (m, 10H, CH<sub>2</sub>), 0.93 (m, 2H, CHSi), 0.70 (m, 4H, CH<sub>2</sub>Si). <sup>13</sup>C NMR (101 MHz, CDCl<sub>3</sub>): δ 32.6 (CH<sub>2</sub>), 29.2 (CH<sub>2</sub>), 27.7 (CH<sub>2</sub>), 26.7 (CH<sub>2</sub>), 25.5 (CH<sub>2</sub>), 21.2 (CHSi), 7.7 (CH<sub>2</sub>Si). <sup>29</sup>Si NMR (79 MHz, CDCl<sub>3</sub>): δ -22.1 (SiH<sub>2</sub>). GC-MS (EI): Calcd for C<sub>18</sub>H<sub>38</sub>Si: 310.25, found: 310.32.



## References

- 1 P. F. Fu, L. Brard, Y. W. Li and T. J. Marks, *J. Am. Chem. Soc.* 1995, **117**, 7157-7168.
- 2 L. B. Junquera, M. C. Puerta and P. Valerga, *Organometallics*. 2012, **31**, 2175-2183.
- 3 A. K. Dash, I. Gourevich, J.- Q. Wang, J. -X. Wang, M.Kapon, and M. S. Eisen  
*Organometallics* 2001, **20**, 5084-5104.
- 4 M. D. Greenhalgh, D. J. Frank and S. P. Thomas, *Adv. Synth. Catal.* 2014, **356**, 584-590.
- 5 C. Chen, M. B. Hecht, A. Kavara, W. W. Brennessel, B. Q. Mercado, D. J. Weix and P. L. Holland,  
*J. Am. Chem. Soc.* 2015, **137**, 13244-13247.
- 6 A. A. Trifonov, T. P. Spaniol and J. Okuda, *Dalton Trans.* 2004, 2245-2250.
- 7 X. Du, Y. Zhang, D. Peng and Z. Haung, *Angew. Chem. Int. Ed.* 2016, **55**, 6671-6675.
- 8 M. Ohashi, M. Konkol, I. Del Rosal, R. Poteau, L. Maron, J. Okuda, *J. Am. Chem. Soc.* 2008,  
**130**, 6920-6921.

# <sup>1</sup>H NMR Spectrum of A

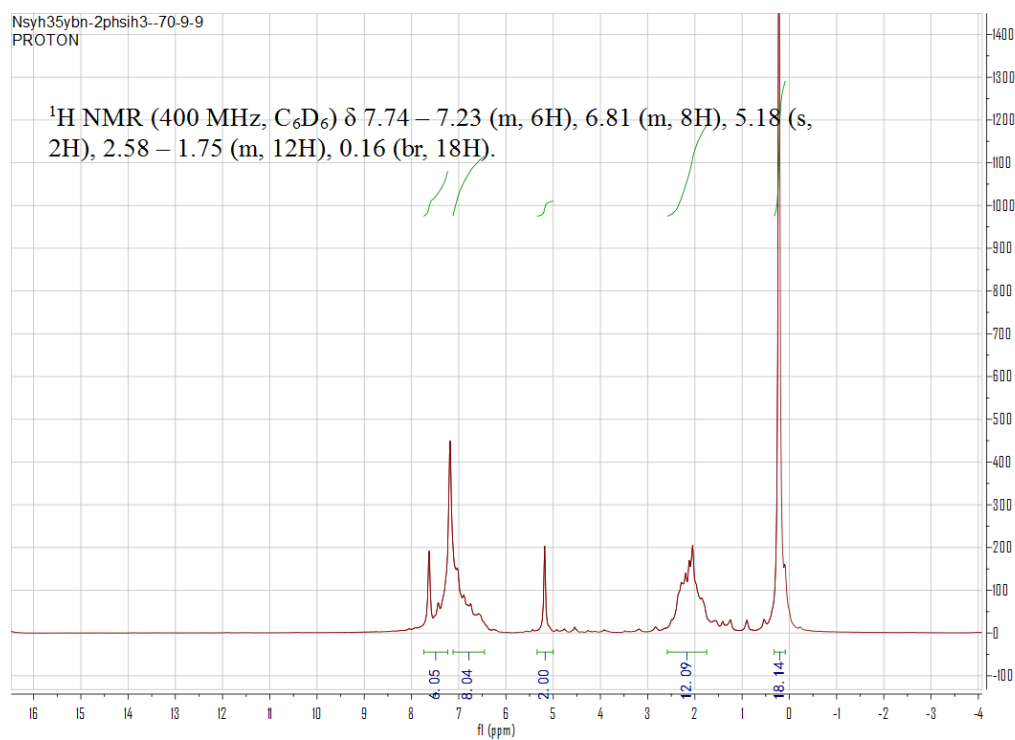

# <sup>13</sup>C NMR Spectrum of A

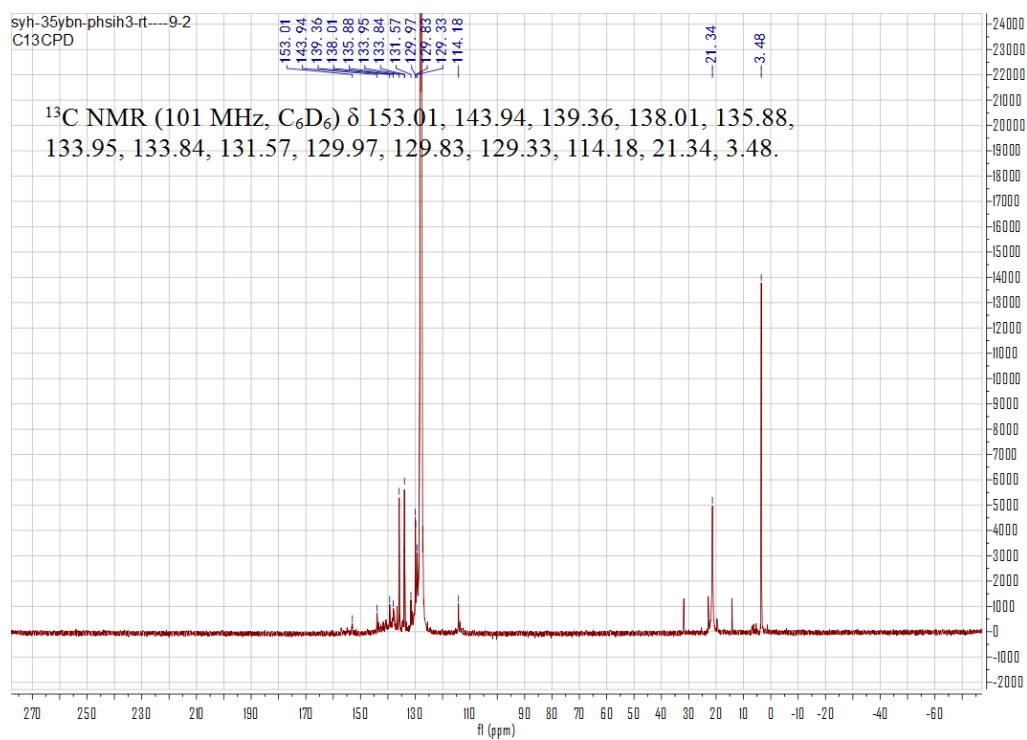

# Proton-decoupled $^{29}\text{Si}$ NMR Spectrum of A

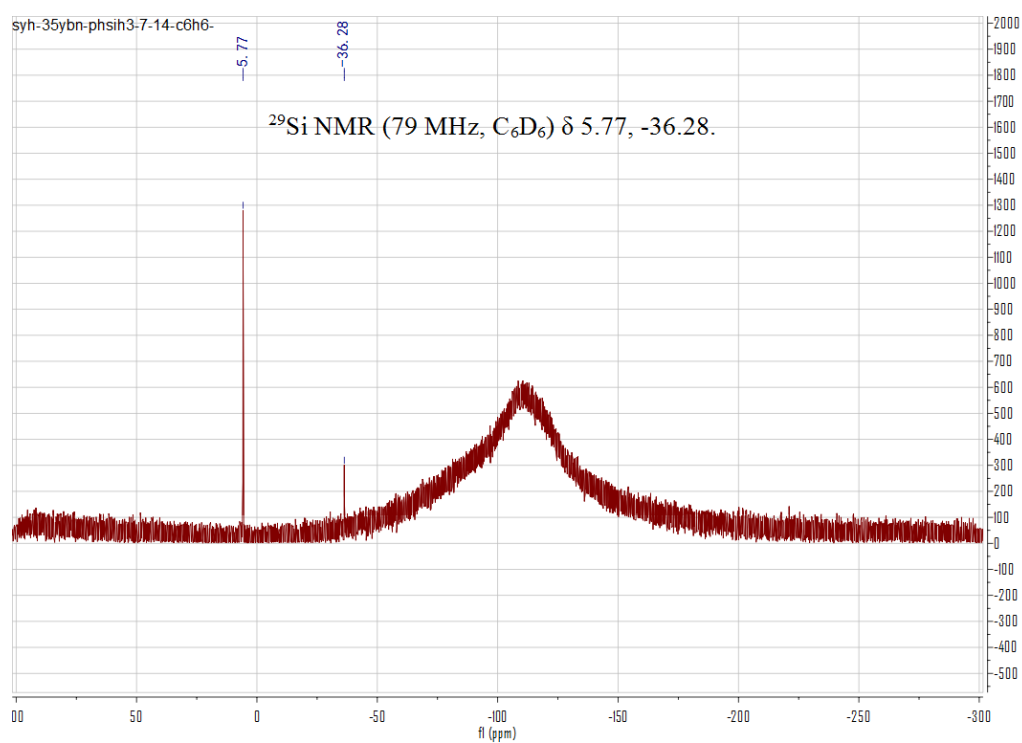

# Proton-coupled $^{29}\text{Si}$ NMR Spectrum of A

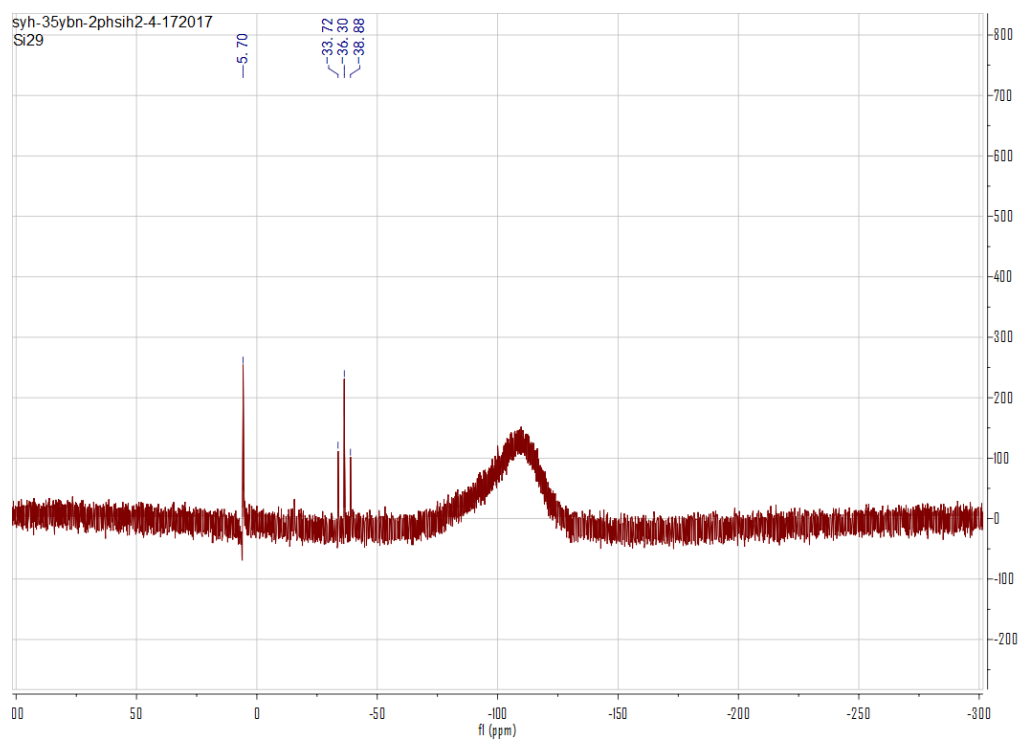

# IR Spectrum of A

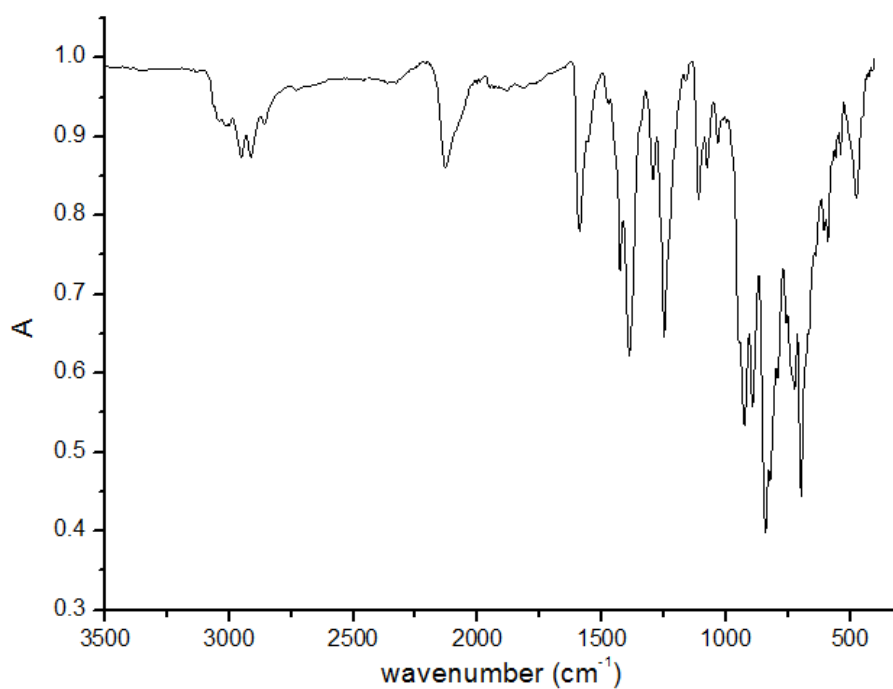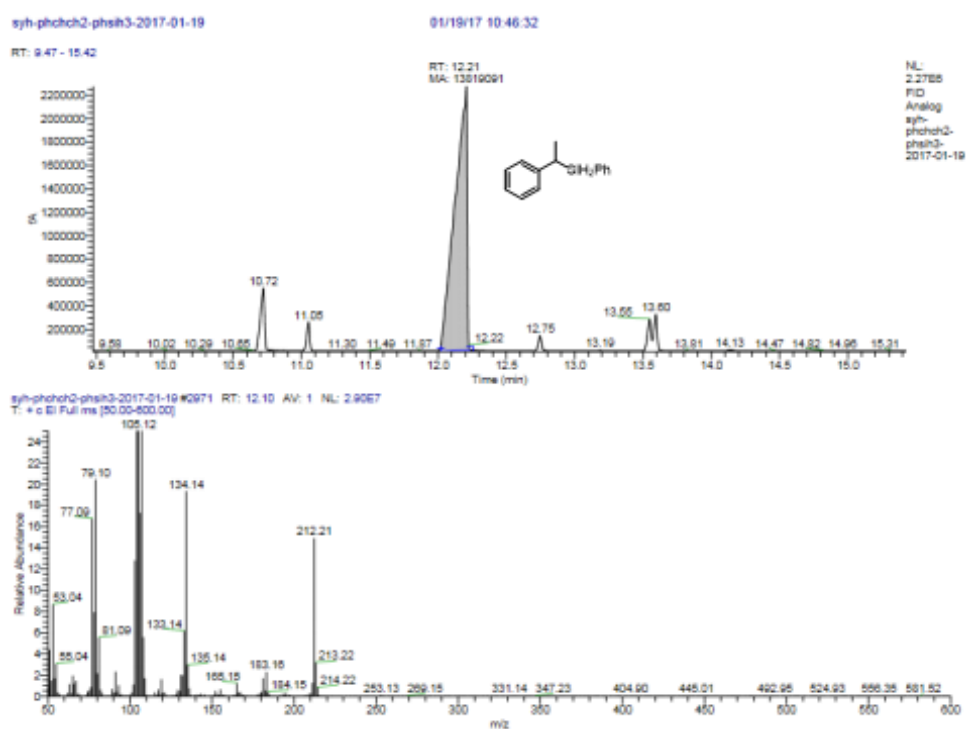

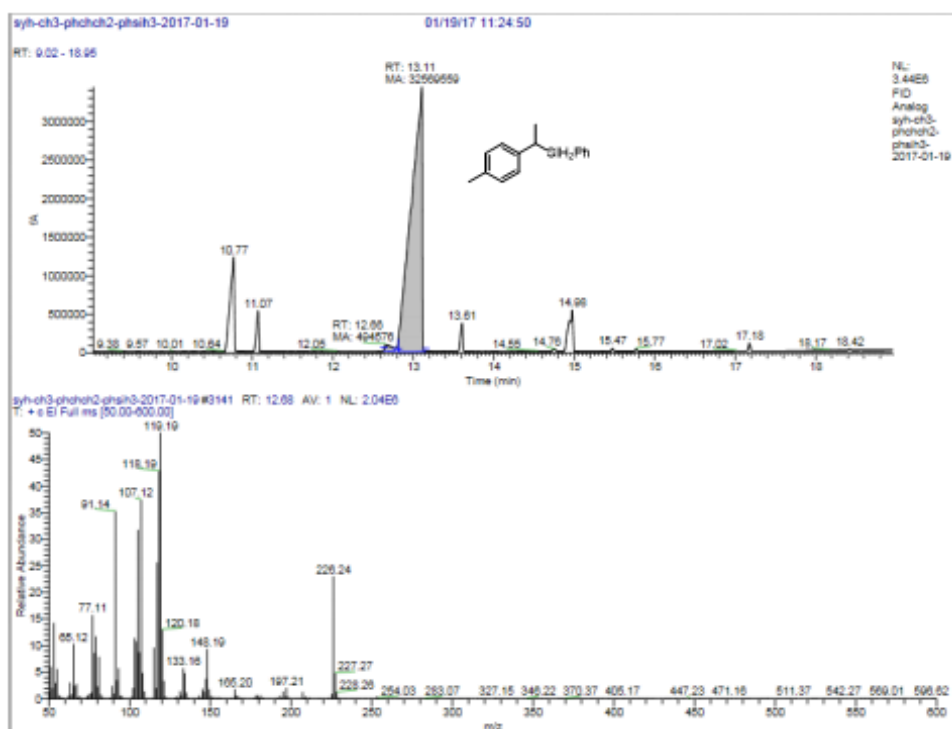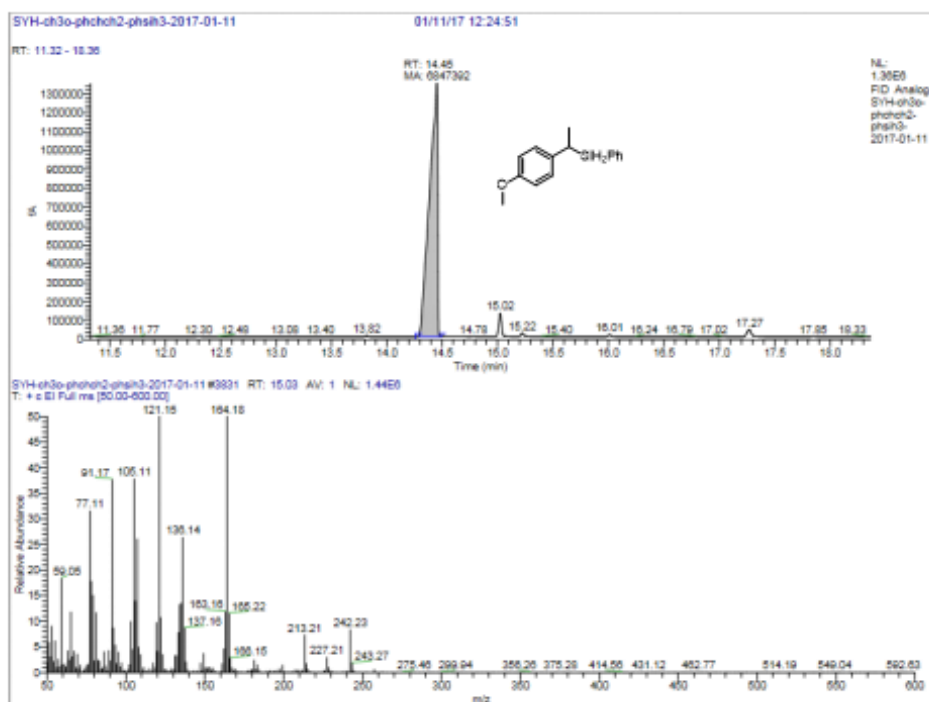

syh-naich2-phsih3-2017-0215

02/15/17 10:19:05

RT: 12.06 - 23.63

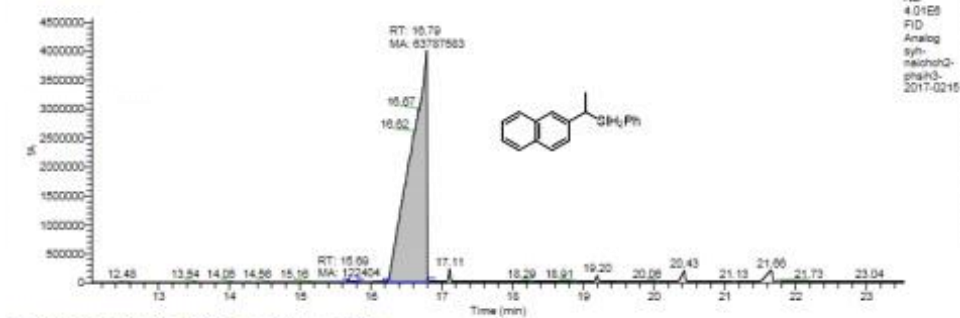

NL: 4.01E8  
FID  
Analog  
syh-naich2-phsih3-2017-0215

syh-naich2-phsih3-2017-0215 #4240 RT: 16.42 AV: 1 NL: 9.48E9  
T: + e1 Full ms (50.00-800.00)

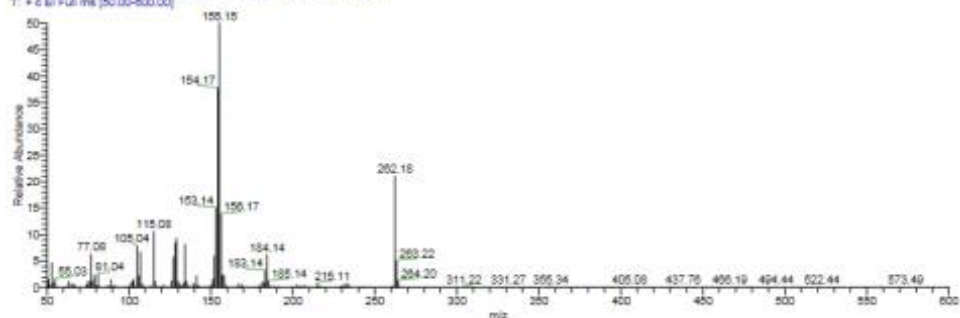

syh-phch3och2-phsih3-2017-0215

02/15/17 09:40:51

RT: 10.88 - 14.98

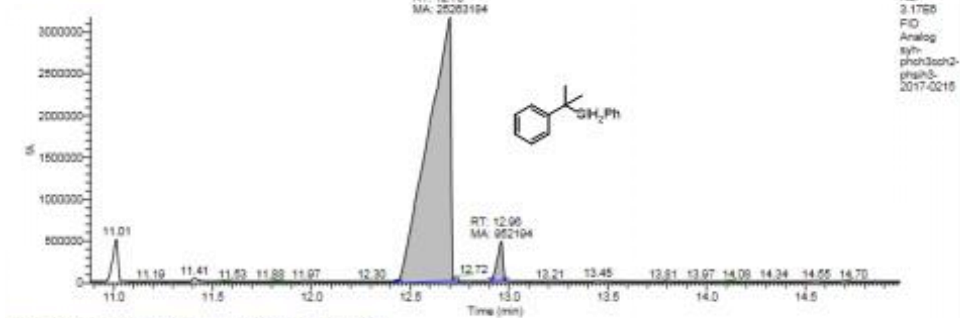

NL: 3.17E8  
FID  
Analog  
syh-phch3och2-phsih3-2017-0215

syh-phch3och2-phsih3-2017-0215 #3118 RT: 12.60 AV: 1 NL: 1.12E7  
T: + e1 Full ms (50.00-800.00)

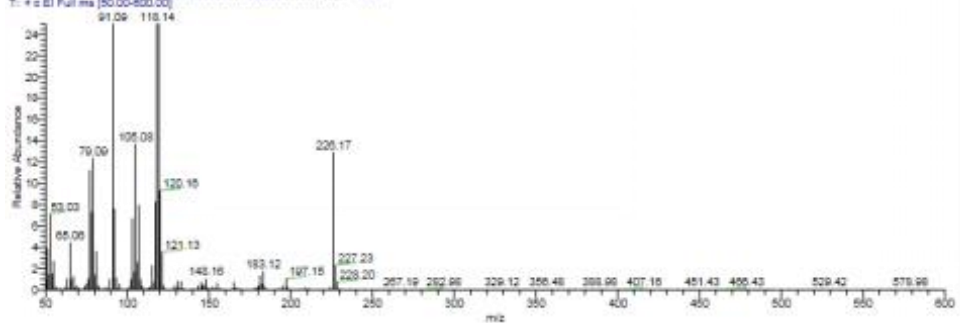

syh-phphch2-phsih3-70du-20170214\_170...

02/14/17 21:17:10

RT: 15.07 - 16.78

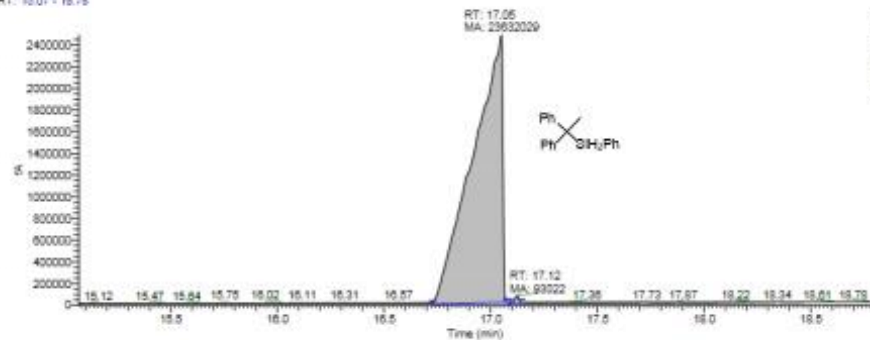

NL:  
2.49E8  
FID Analog  
syh-phphch2-  
phsih3-70du-  
20170214\_170  
214211710

syh-phphch2-phsih3-70du-20170214\_170214211710#4394 RT: 16.94 AV: 1 NL: 6.45E8  
T: + e El Full ms (50.00-600.00)

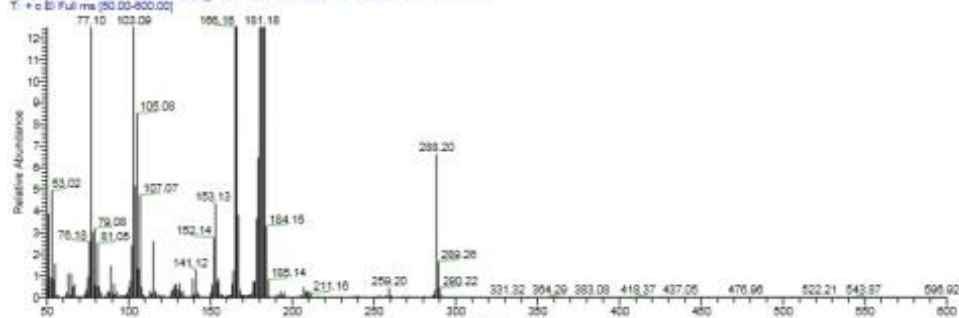

syh-phch2chch2-phsih3-70du-2017-0217

02/17/17 10:44:32

RT: 11.20 - 15.99

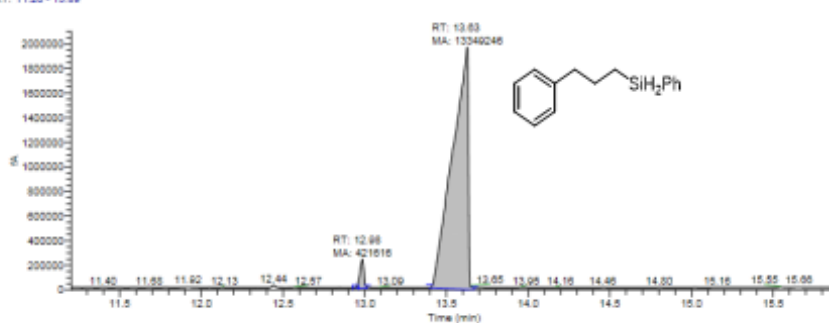

NL:  
1.97E8  
FID Analog  
syh-  
phch2chch2-  
phsih3-  
70du-2017-  
0217

syh-phch2chch2-phsih3-70du-2017-0217#5407 RT: 13.58 AV: 1 NL: 1.10E7  
T: + e El Full ms (50.00-600.00)

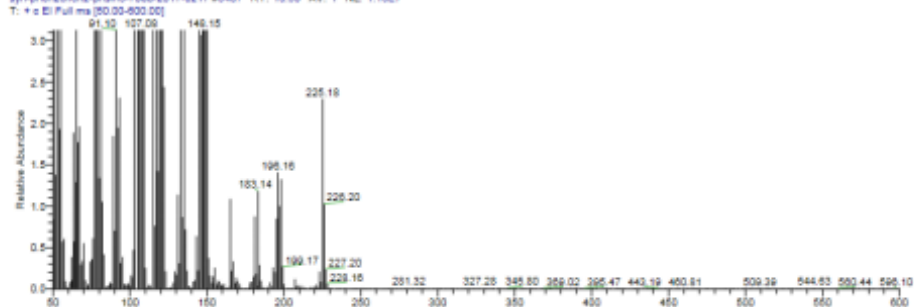

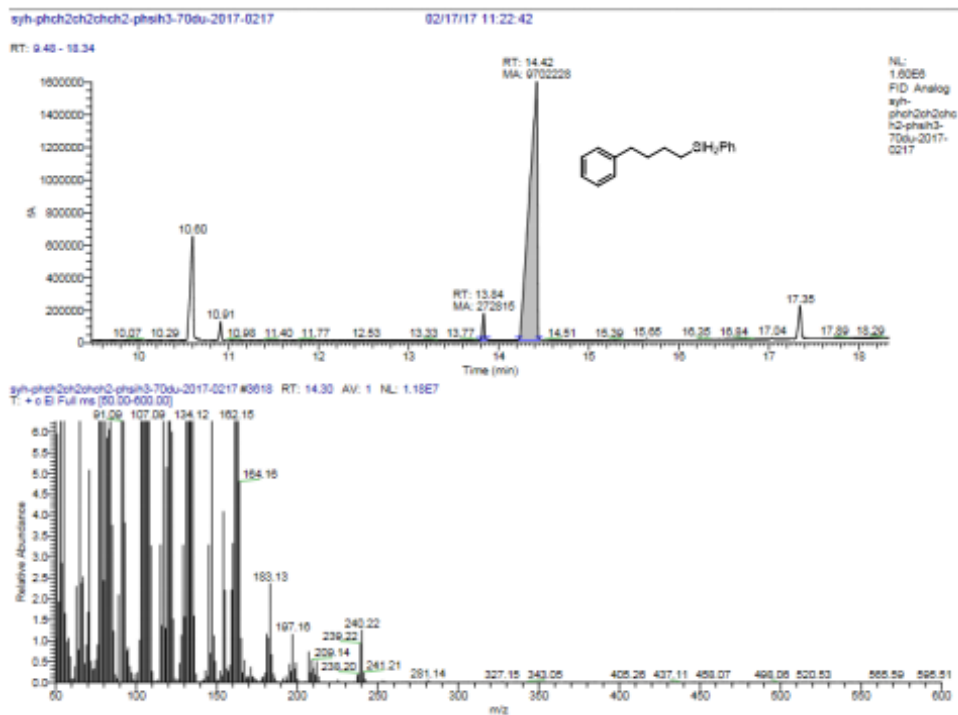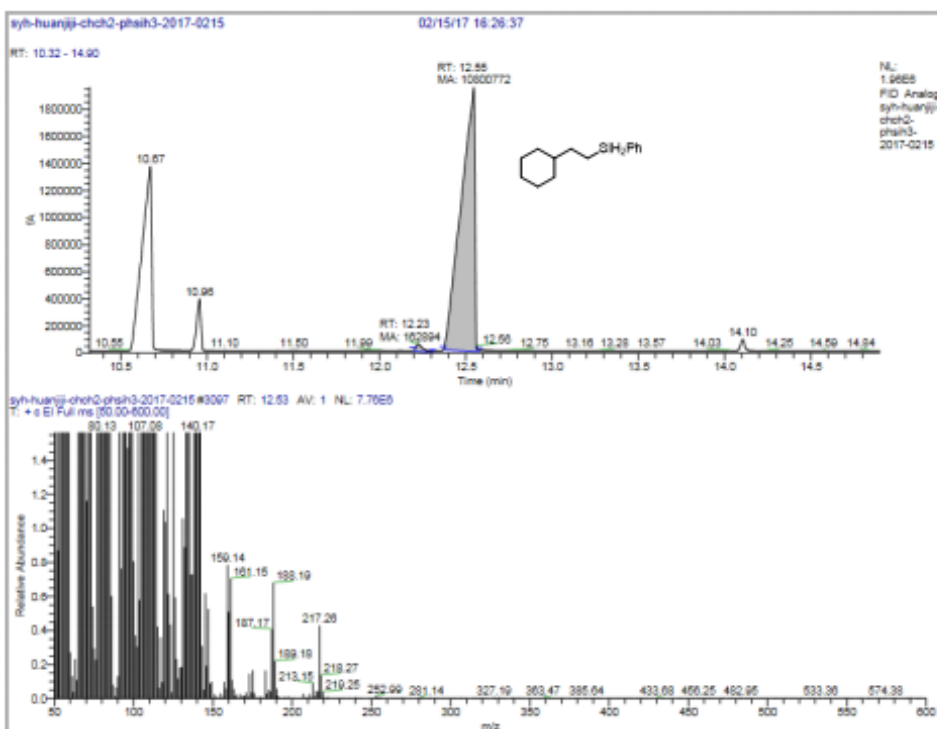





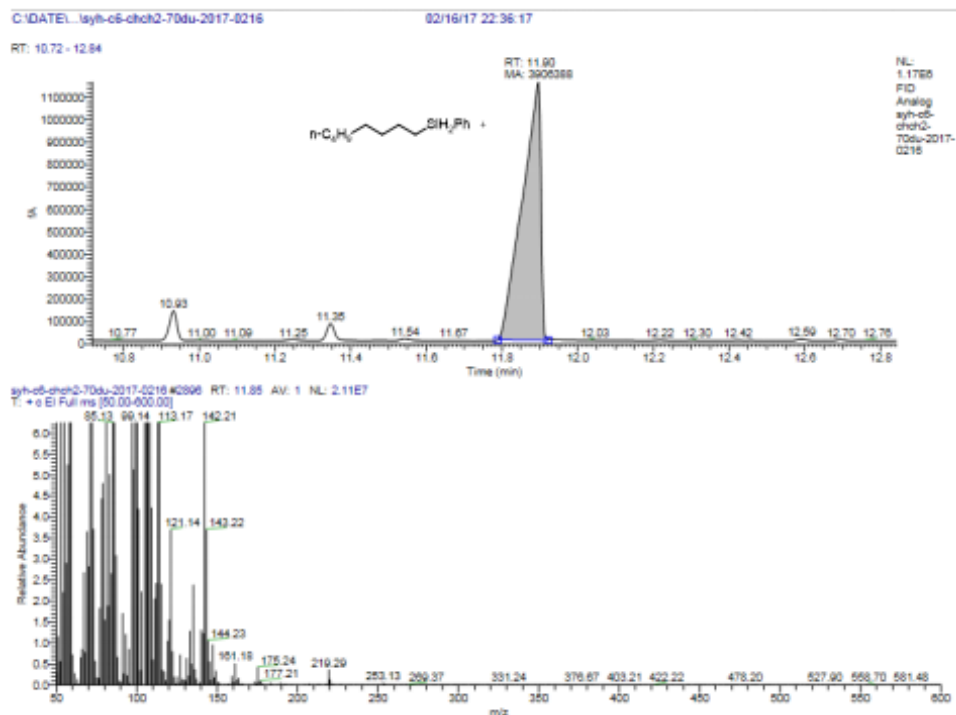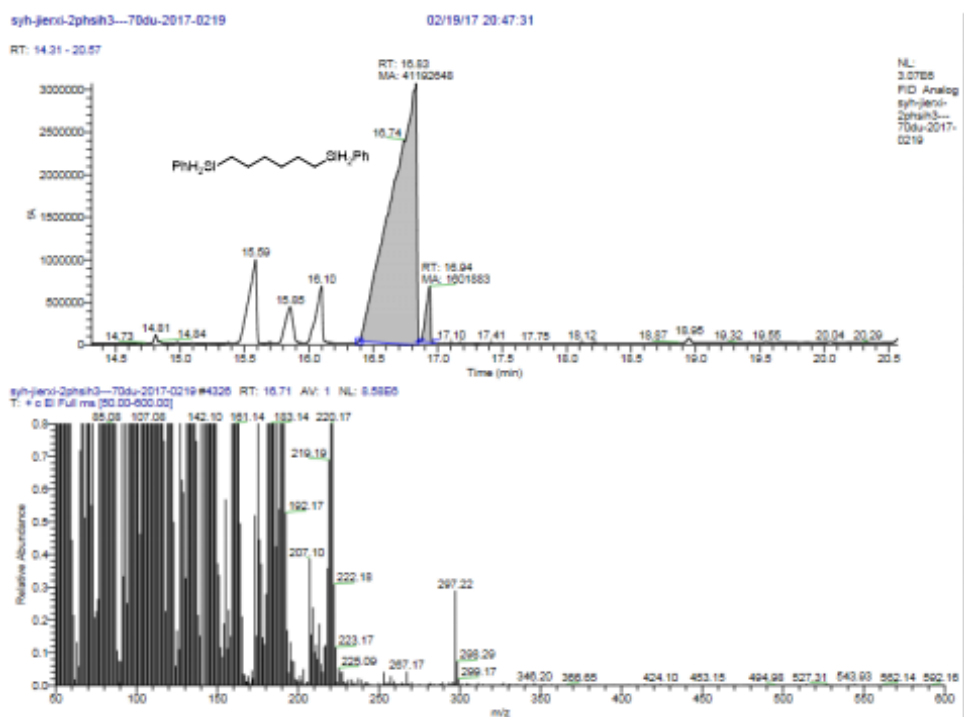

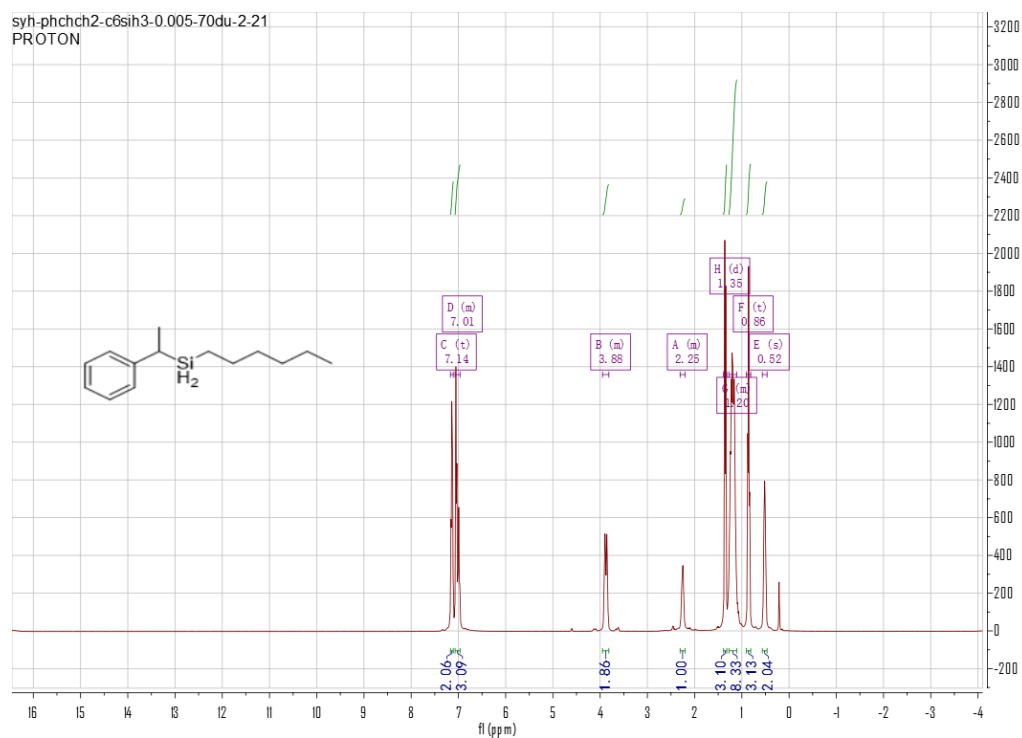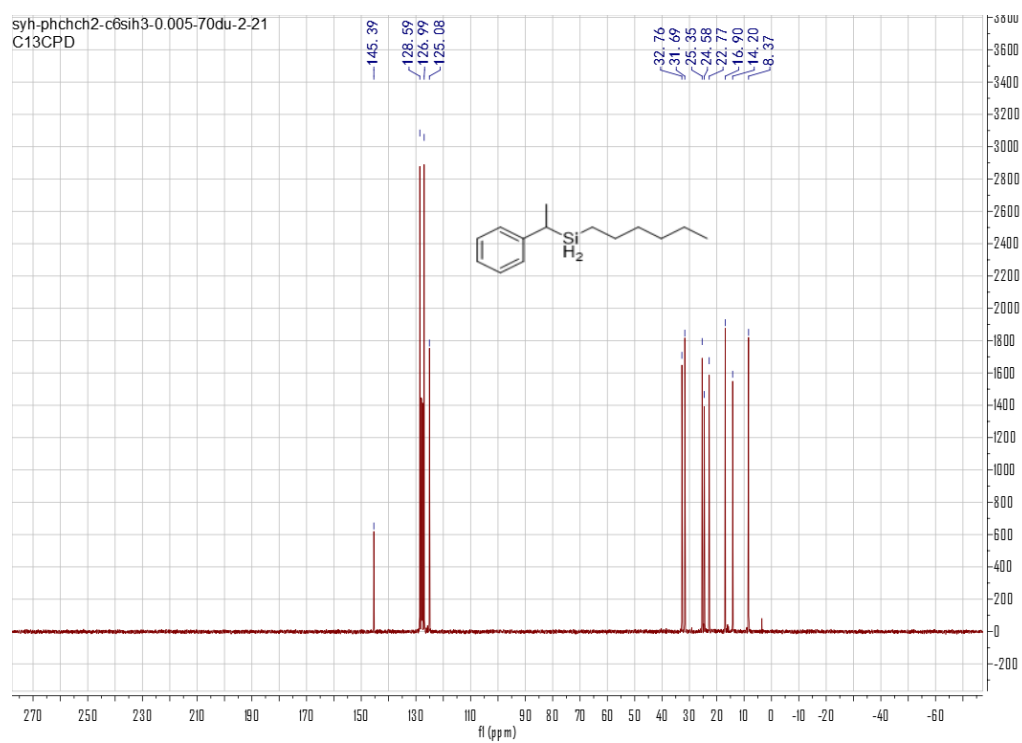

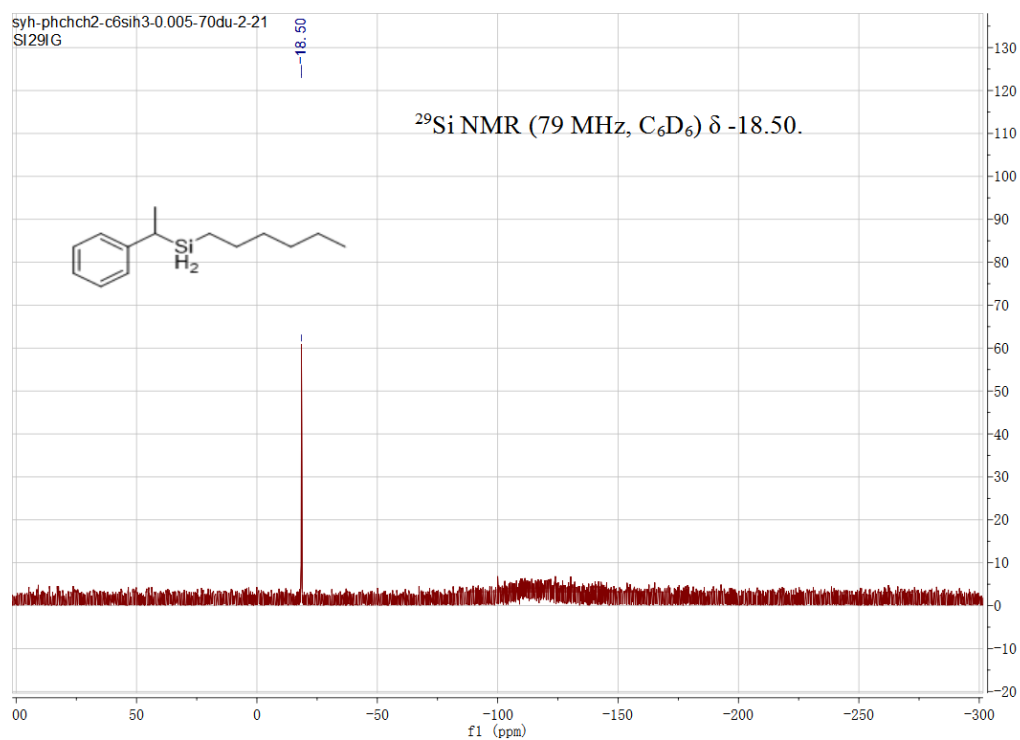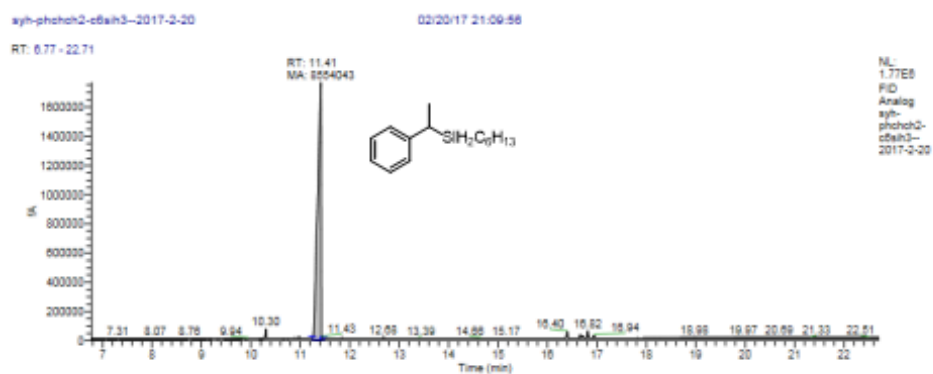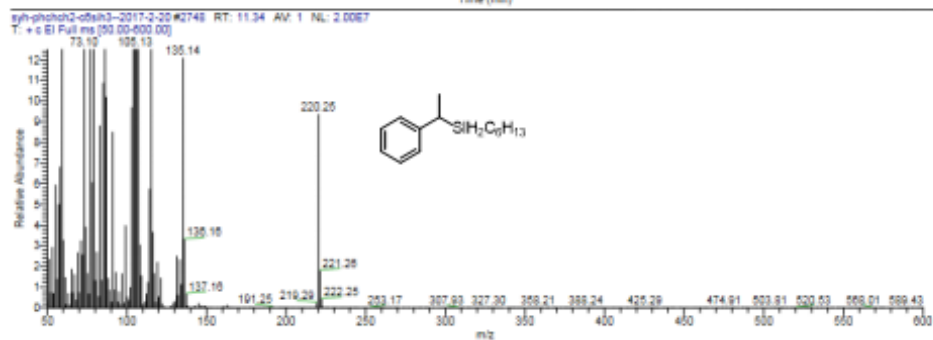

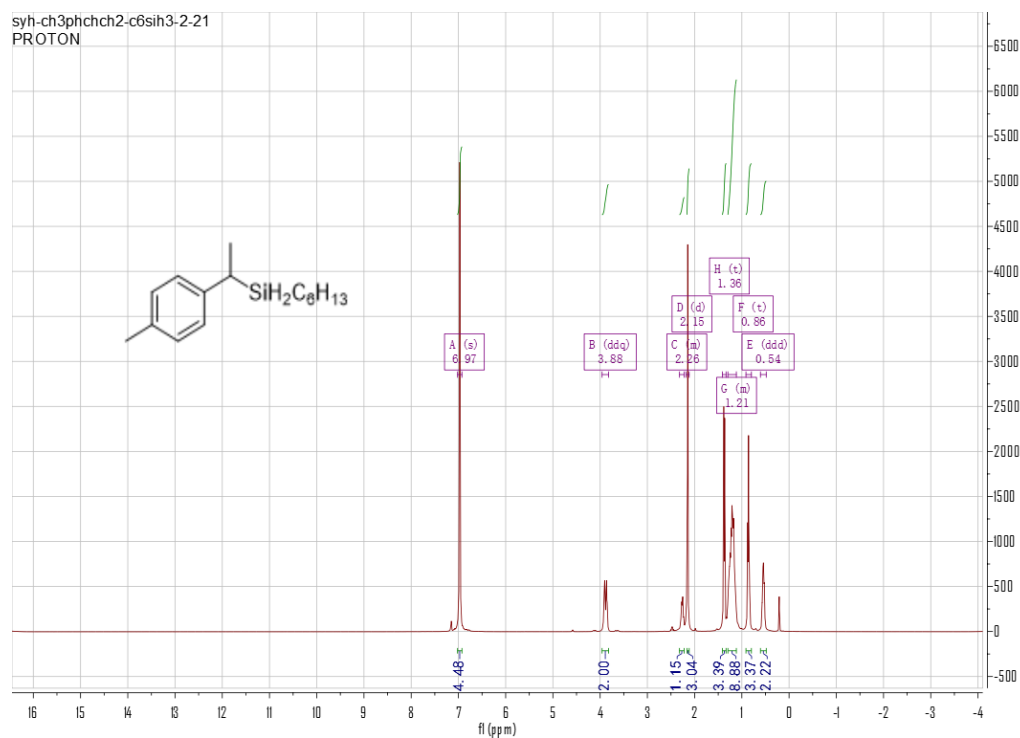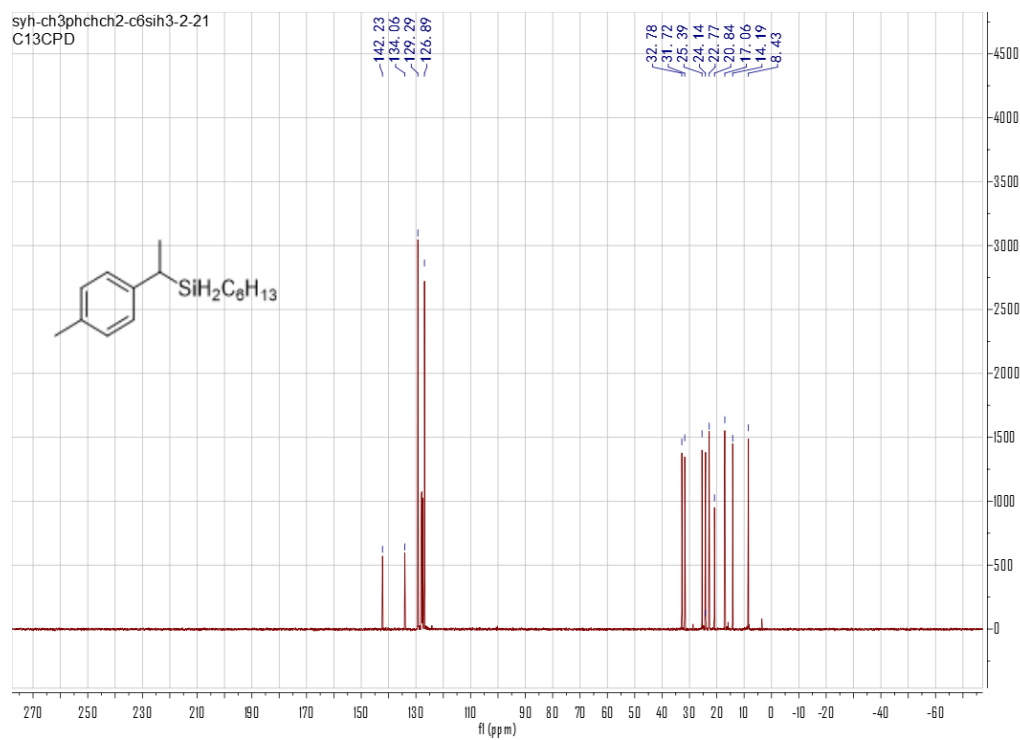

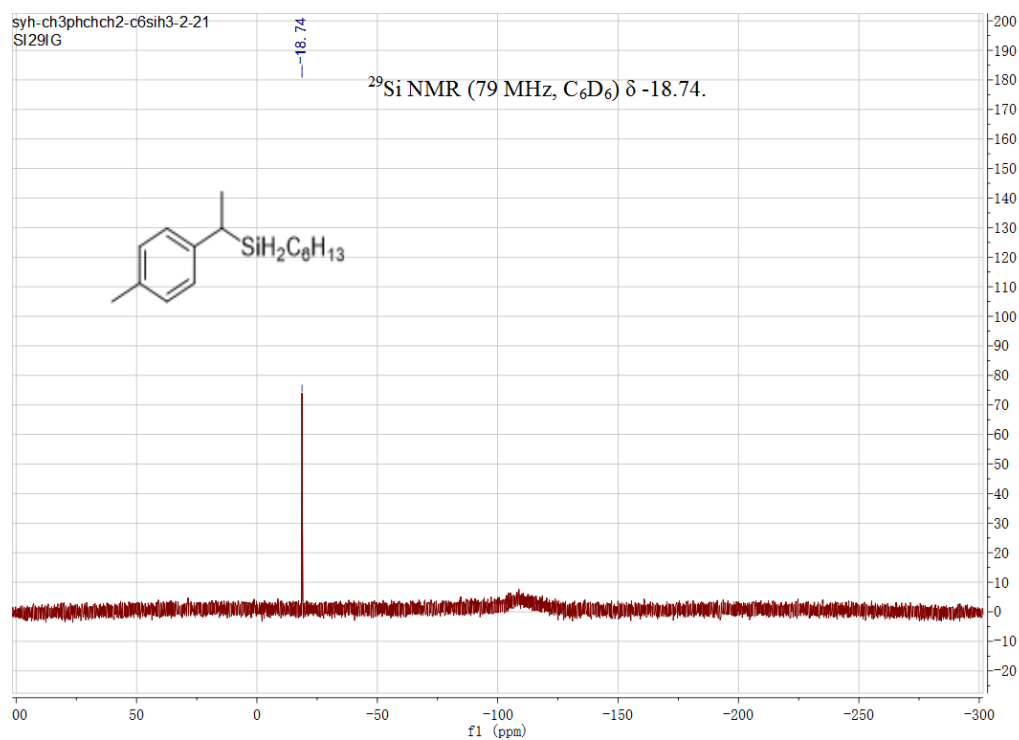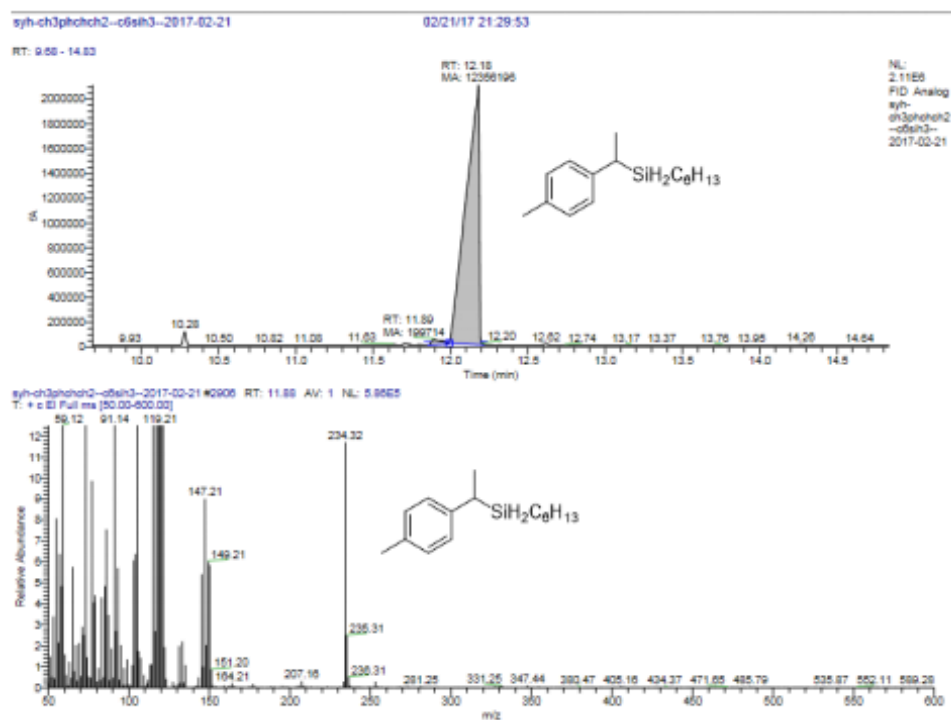

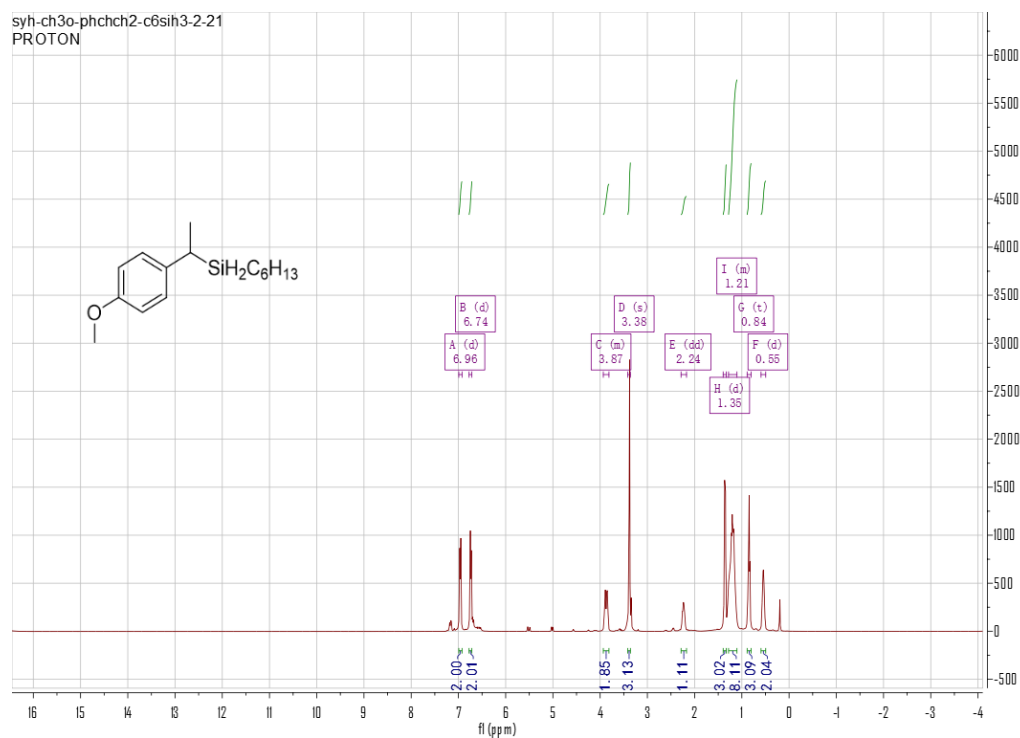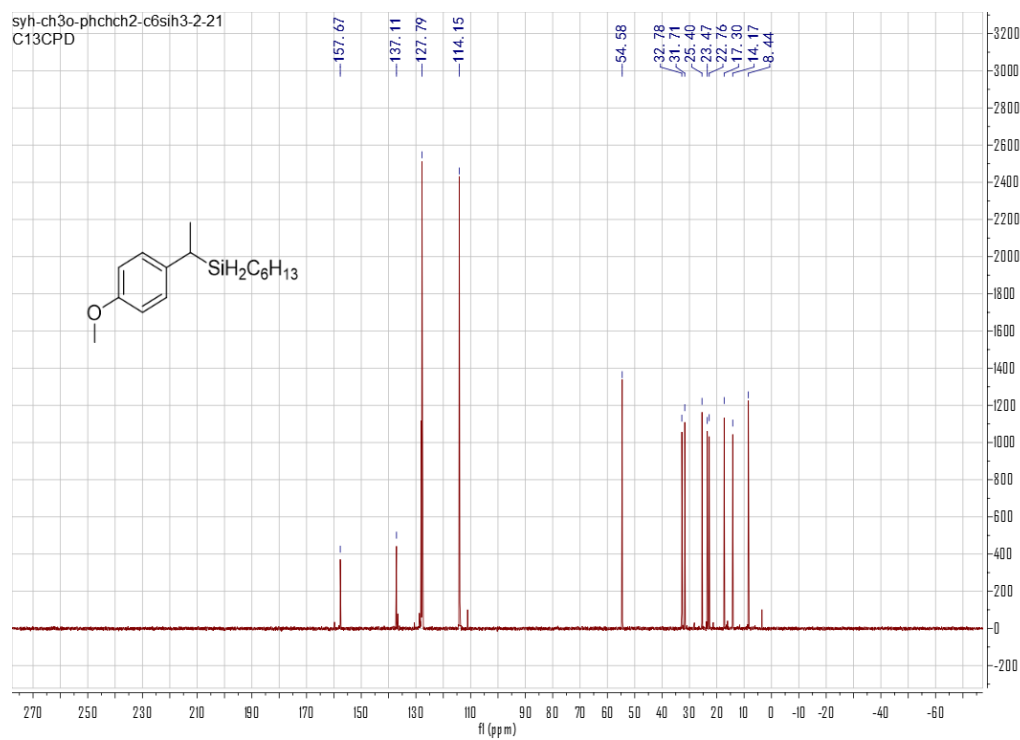

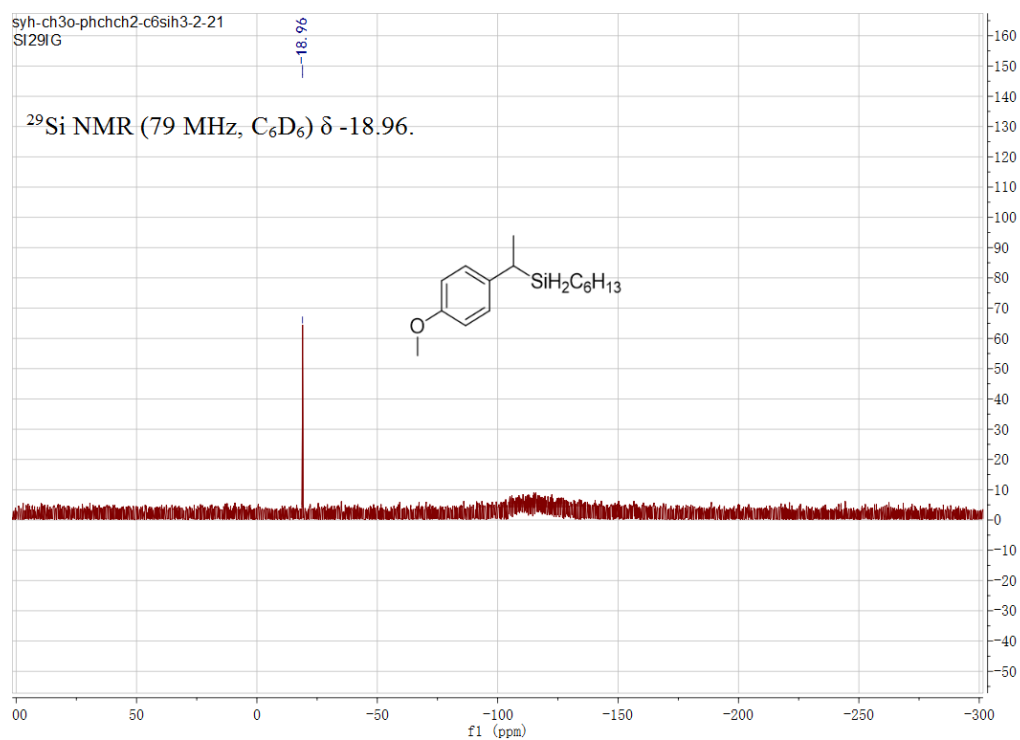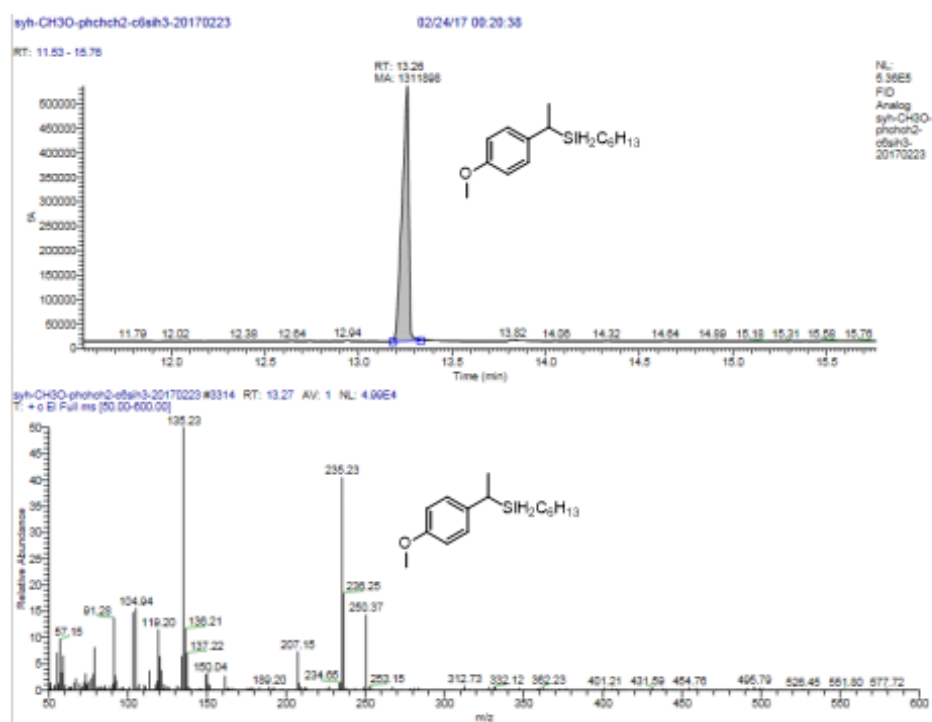



SYH-Phch3c=ch2-C6SIH3-2017=2-22  
PROTON

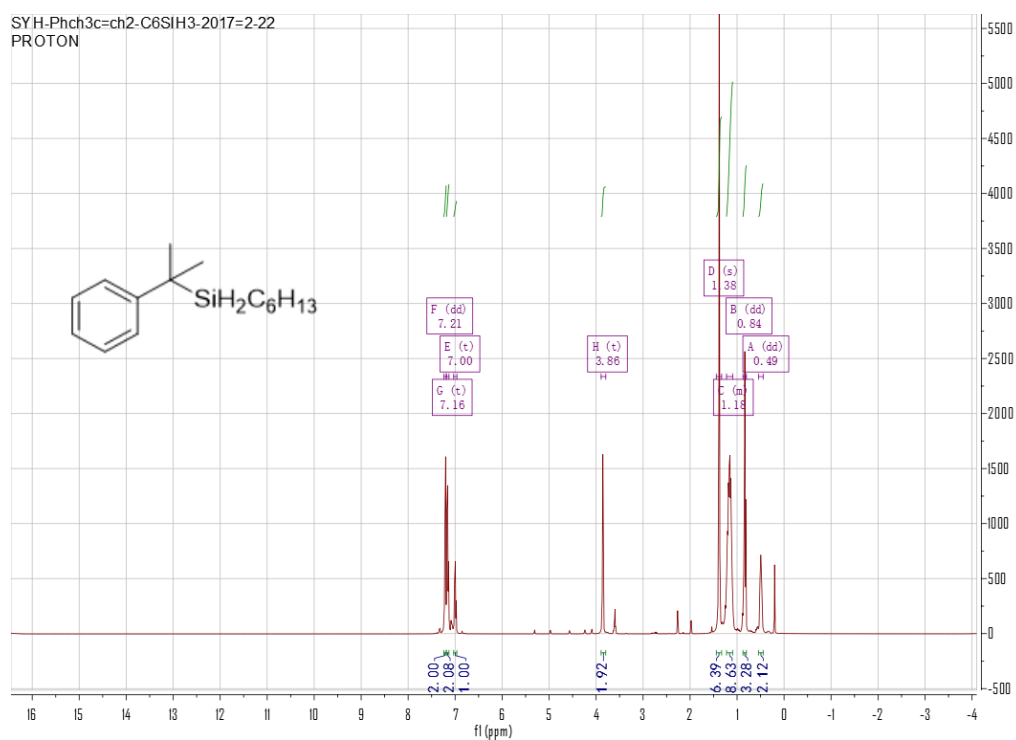

SYH-Phch3c=ch2-C6SIH3-2017=2-22  
C13CPD

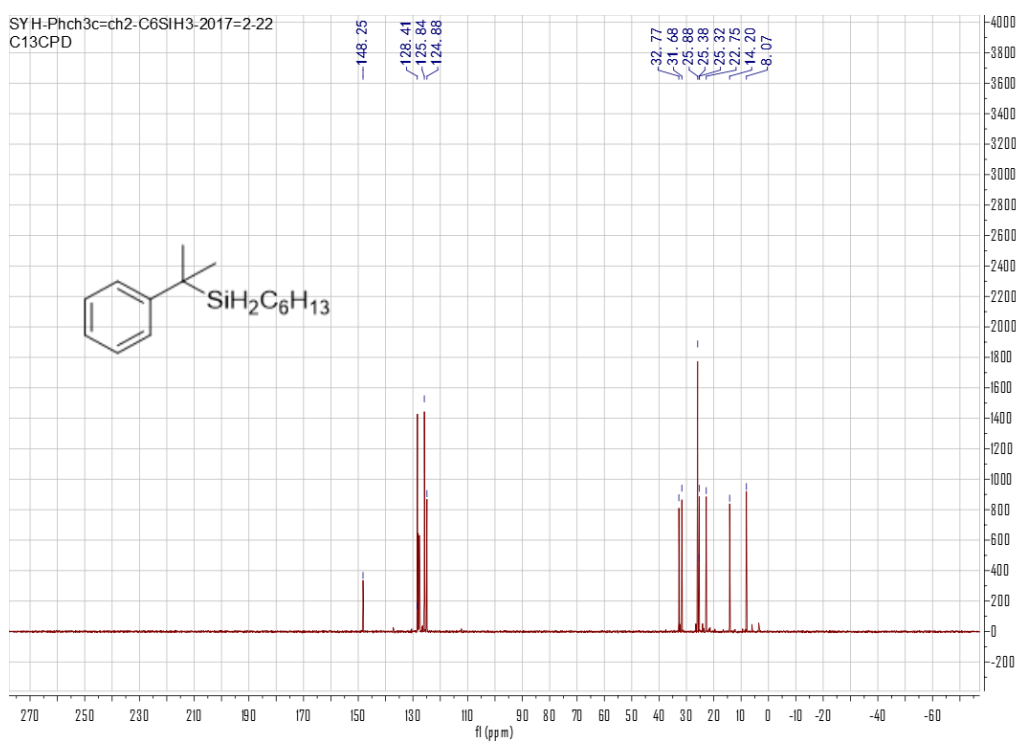

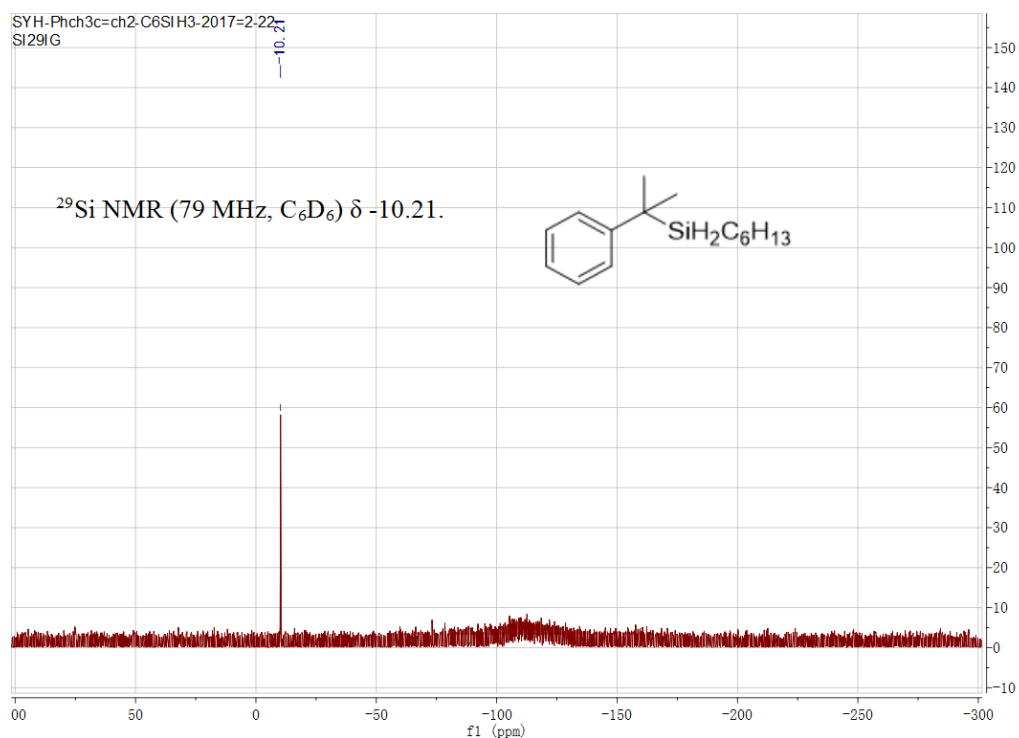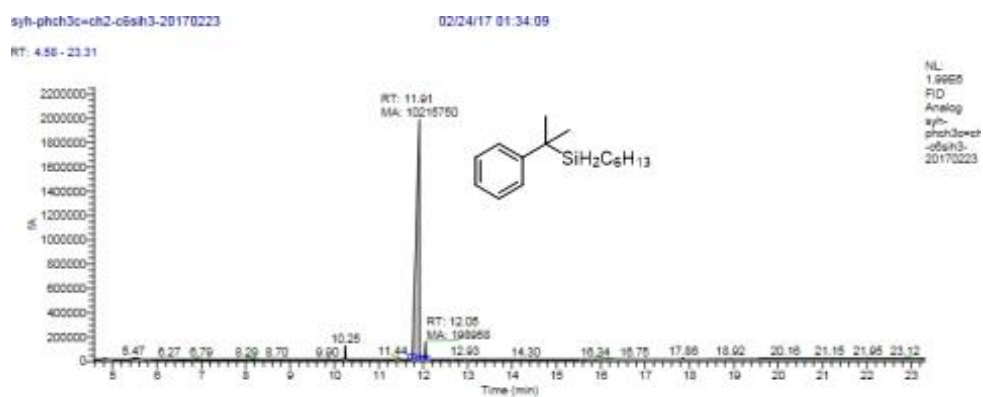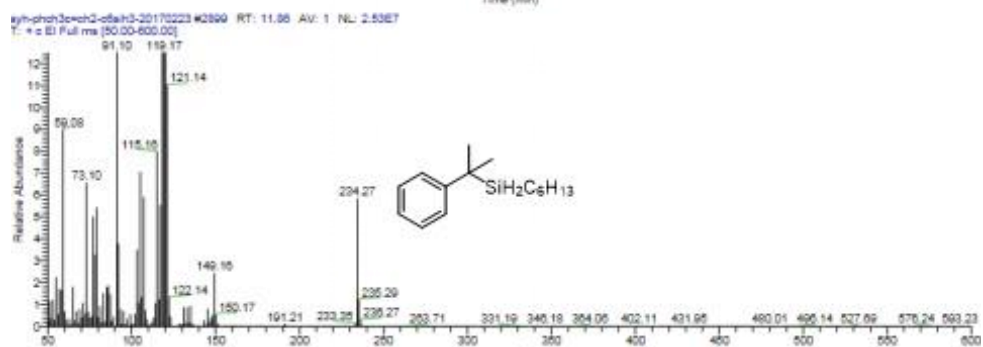

SYH-Phphc=ch2-C6SIH3-2017=2-22  
PROTON

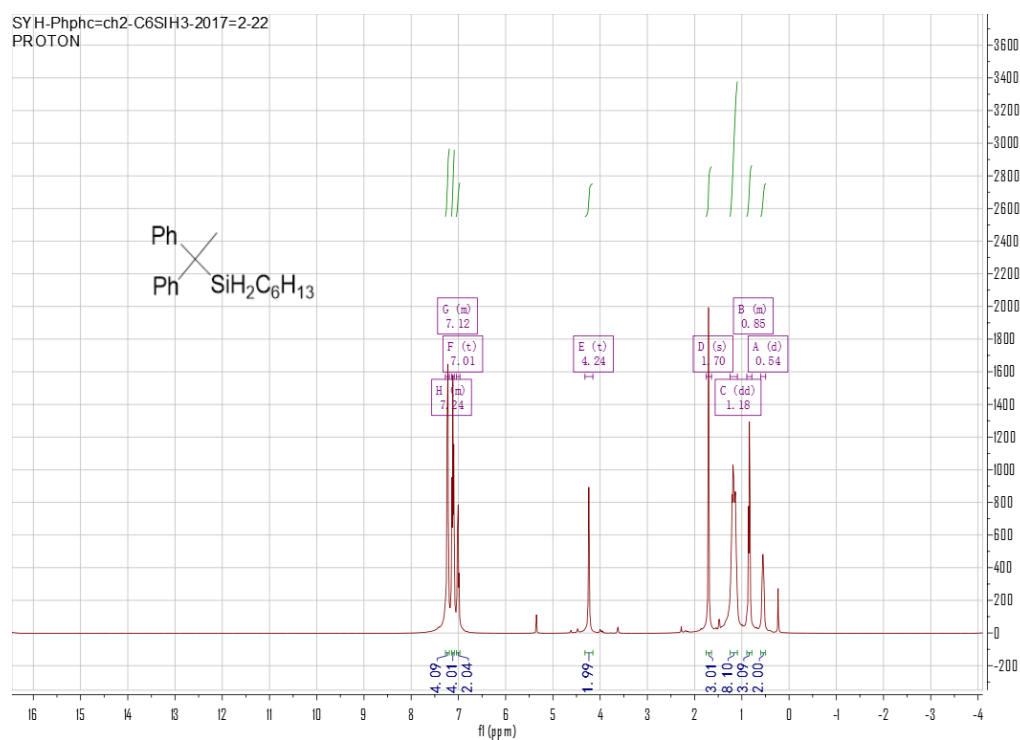

SYH-Phphc=ch2-C6SIH3-2017=2-22  
C13CPD

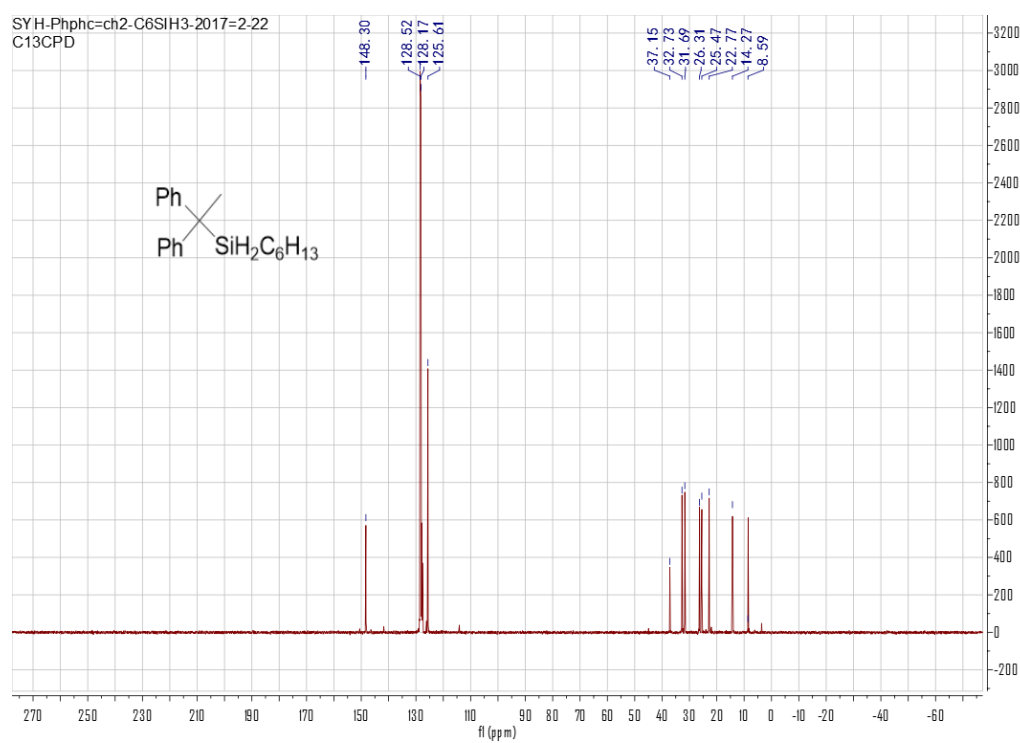

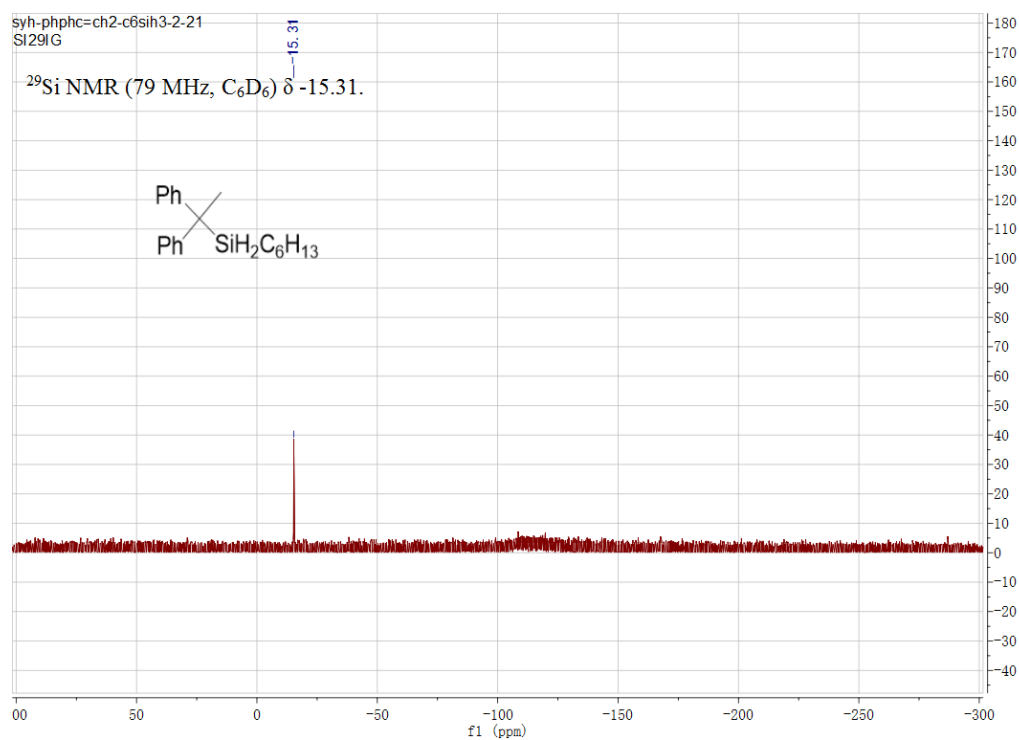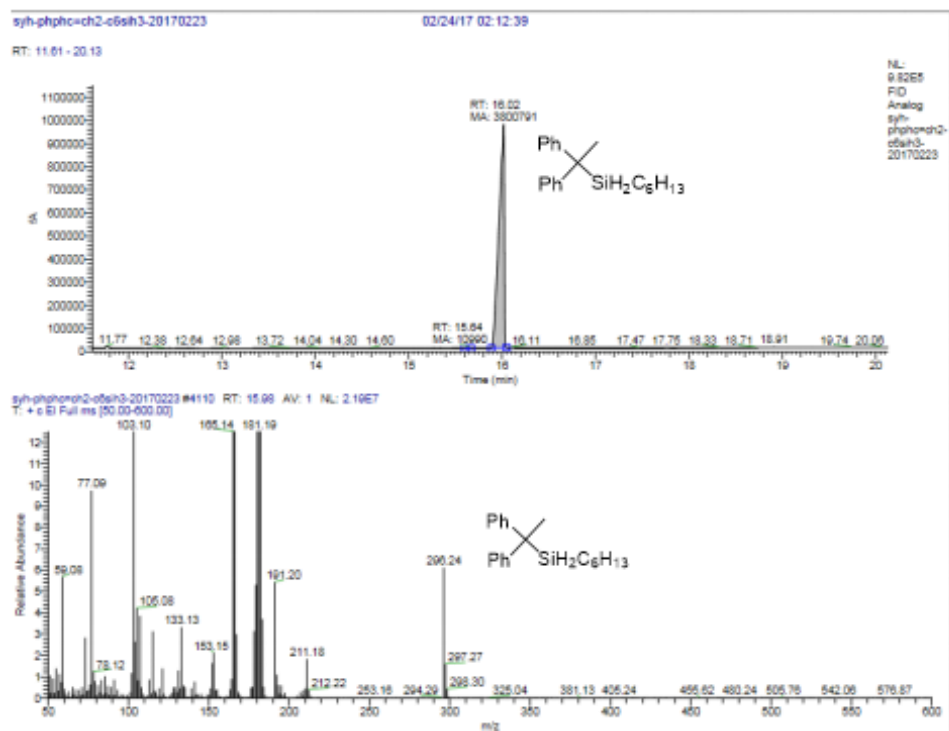

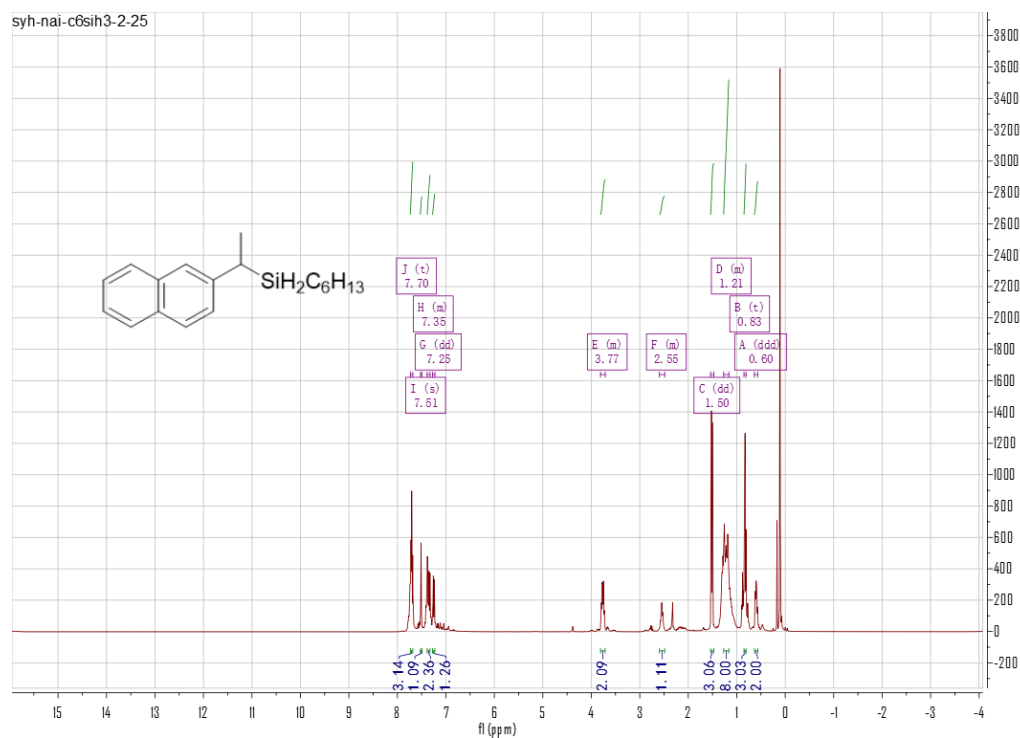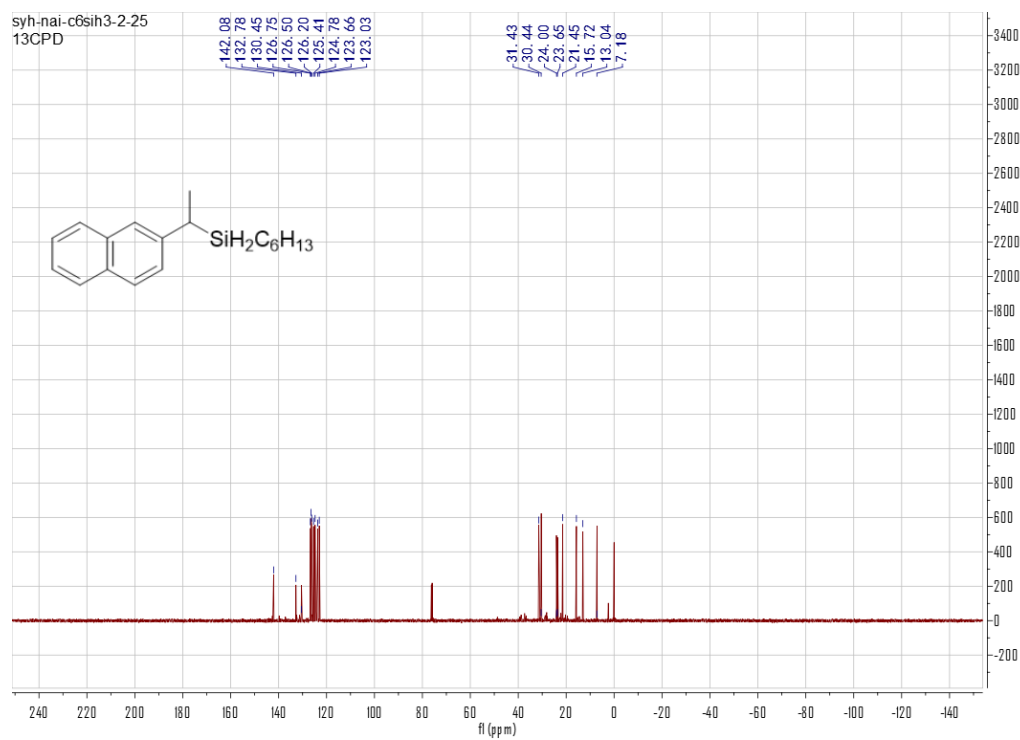

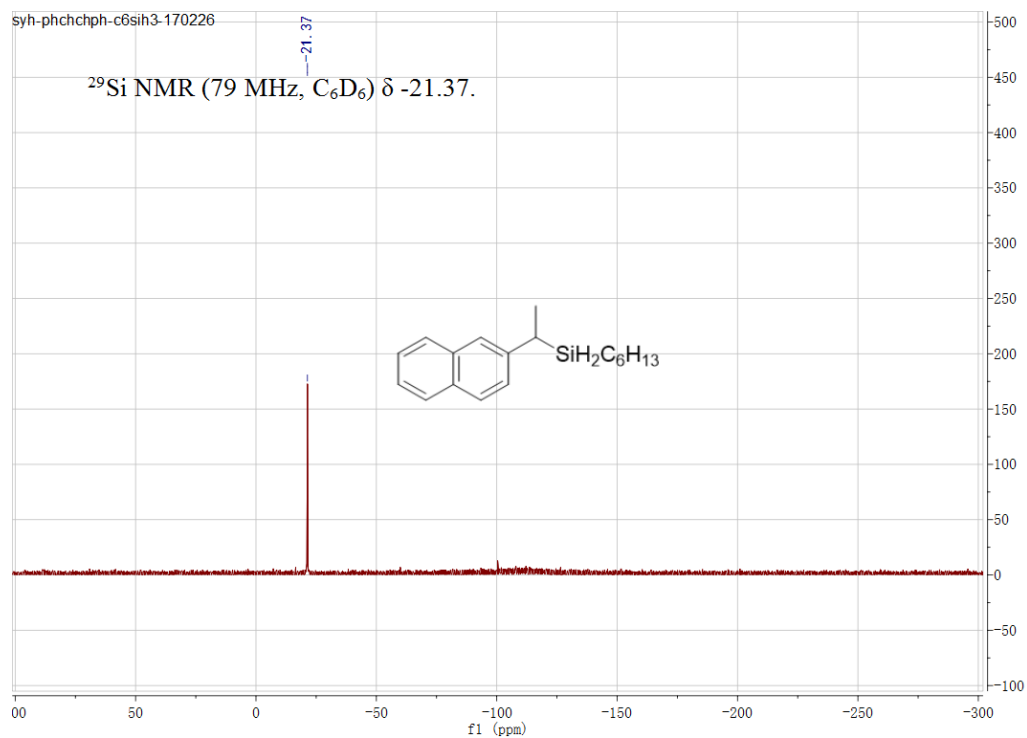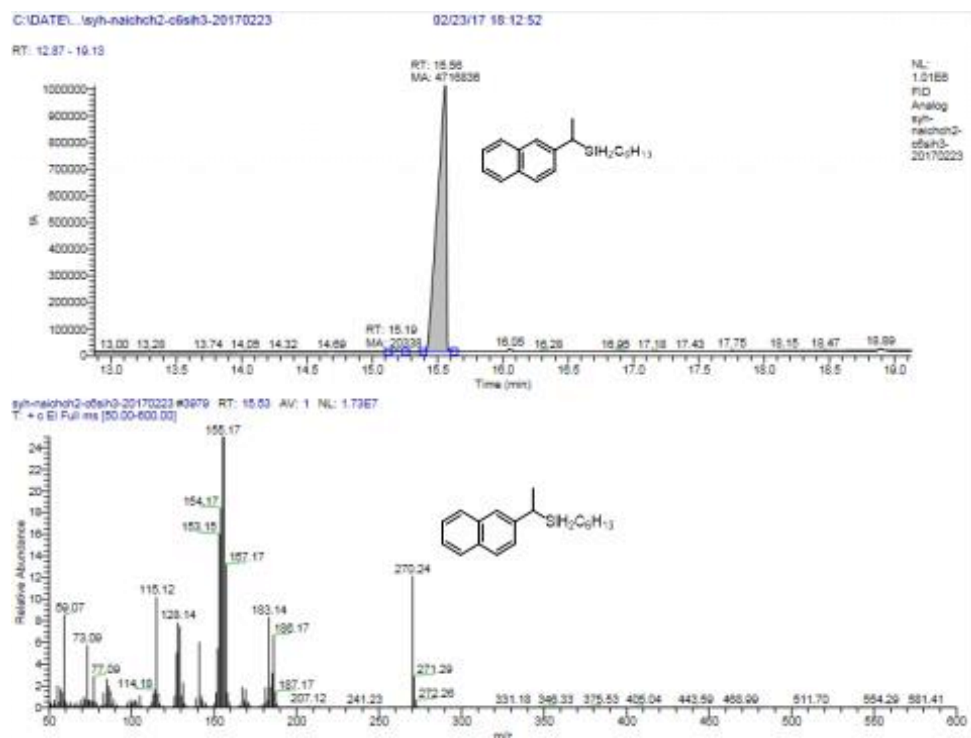

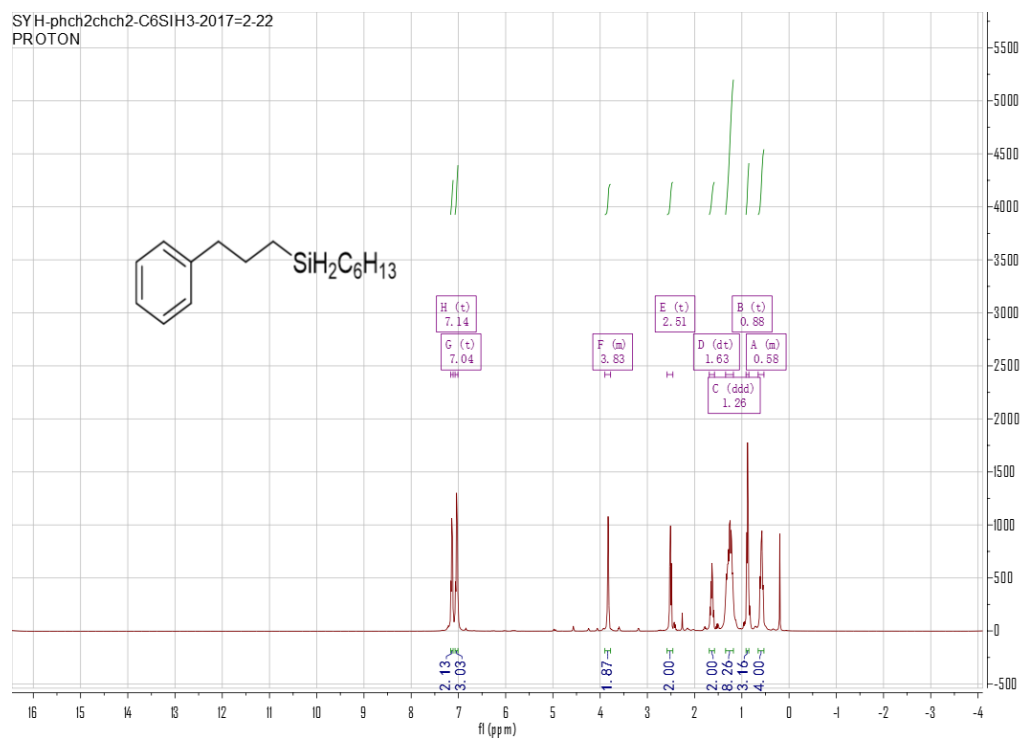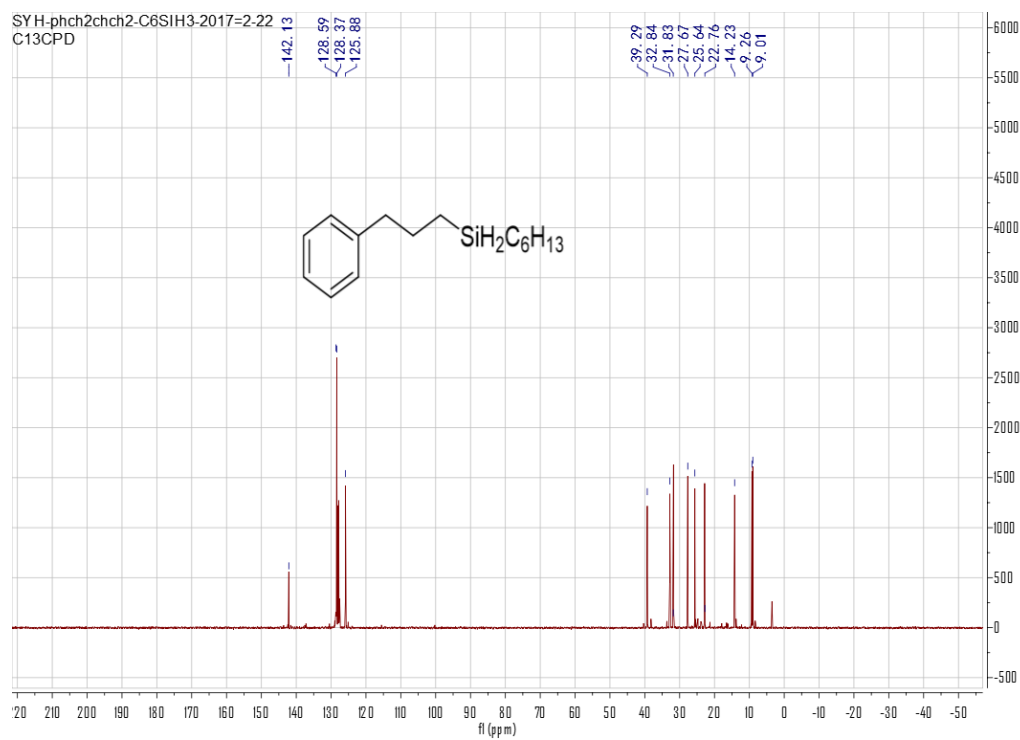

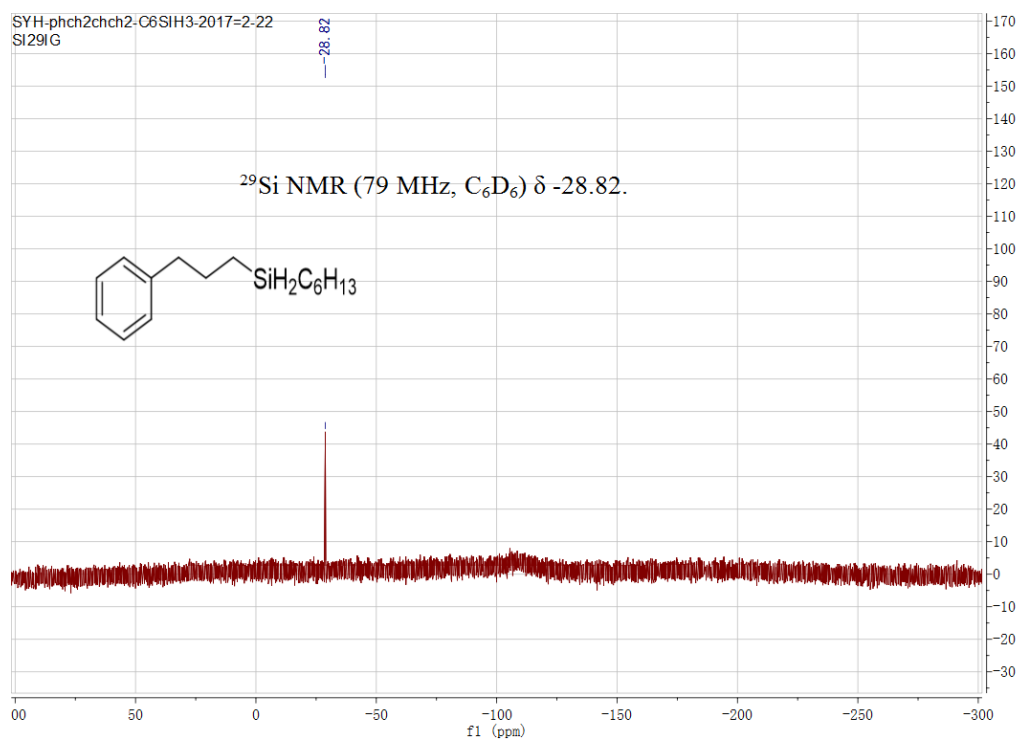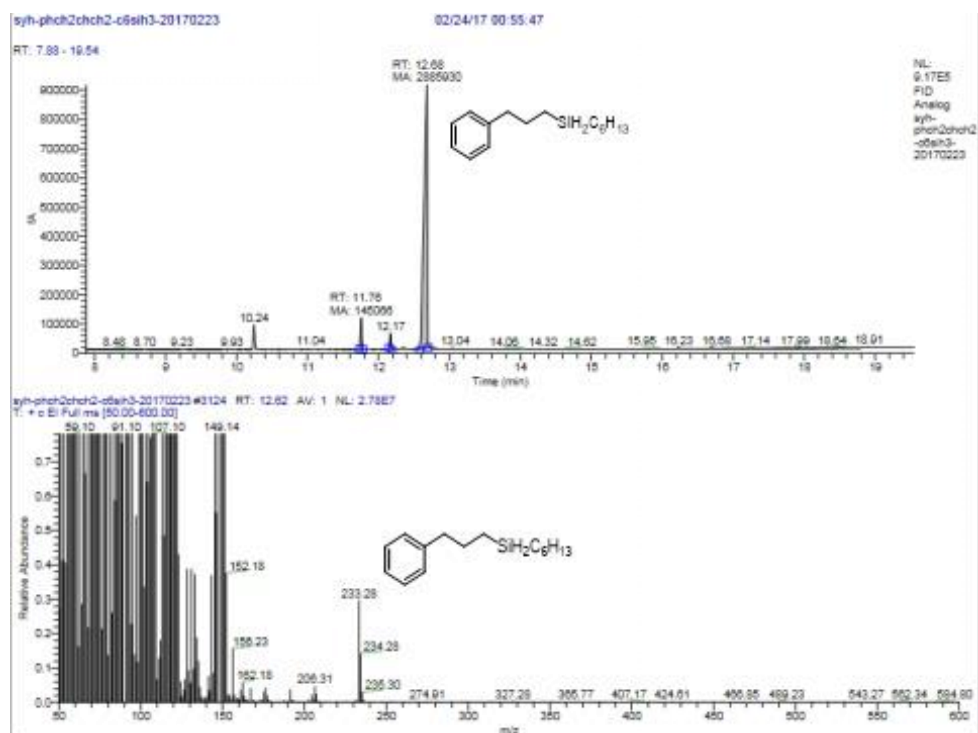



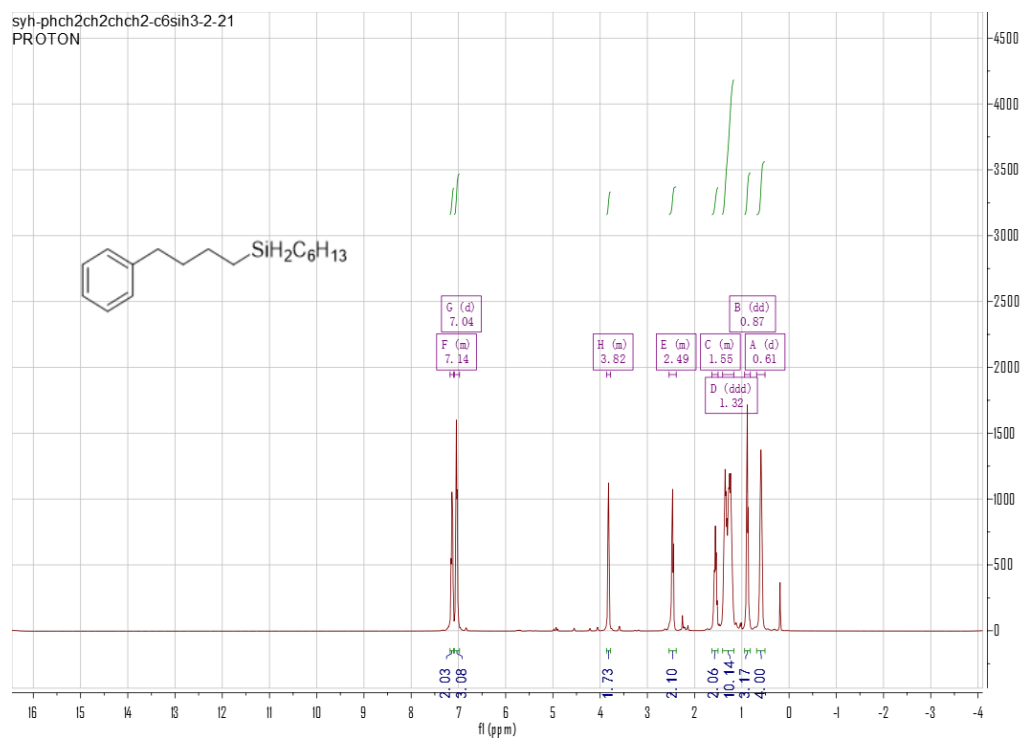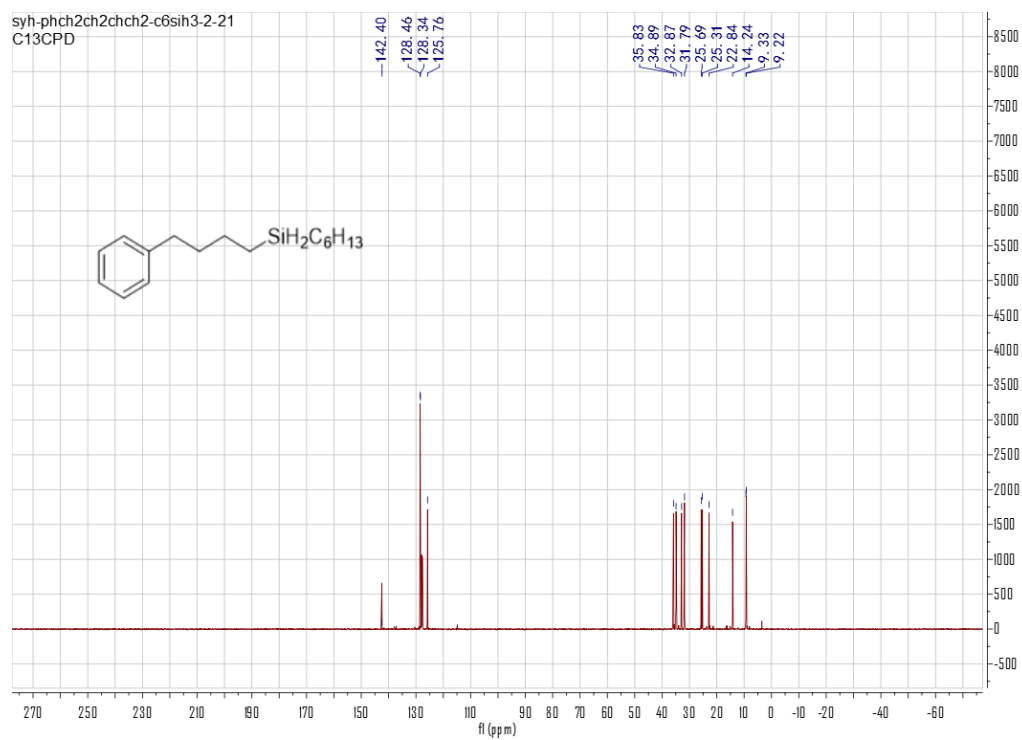

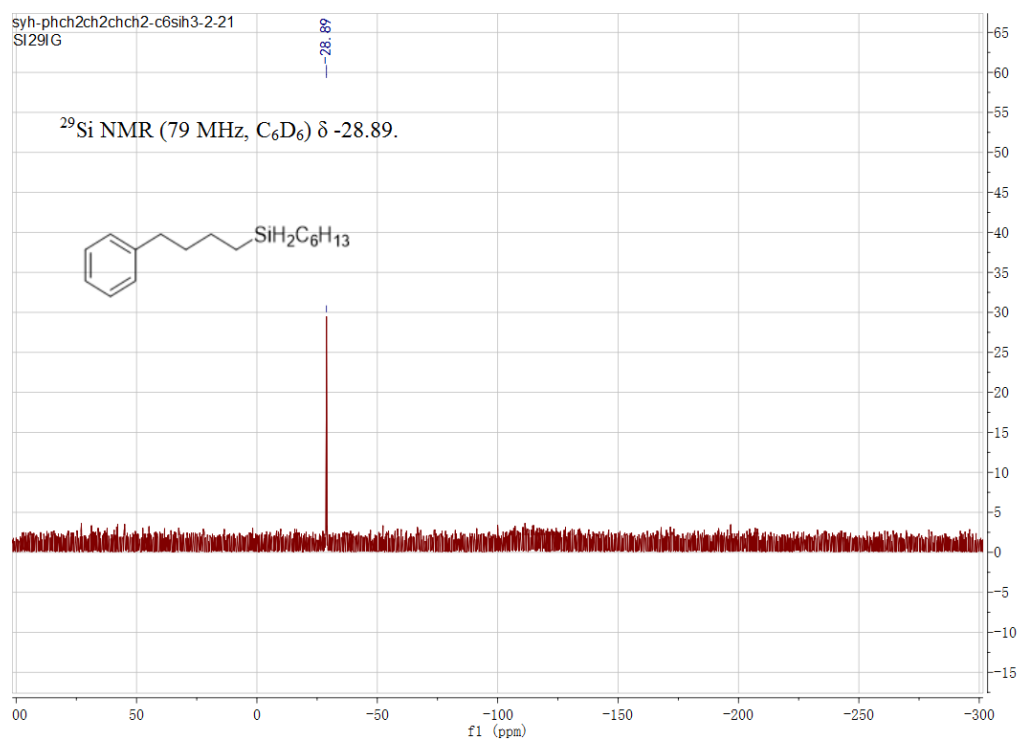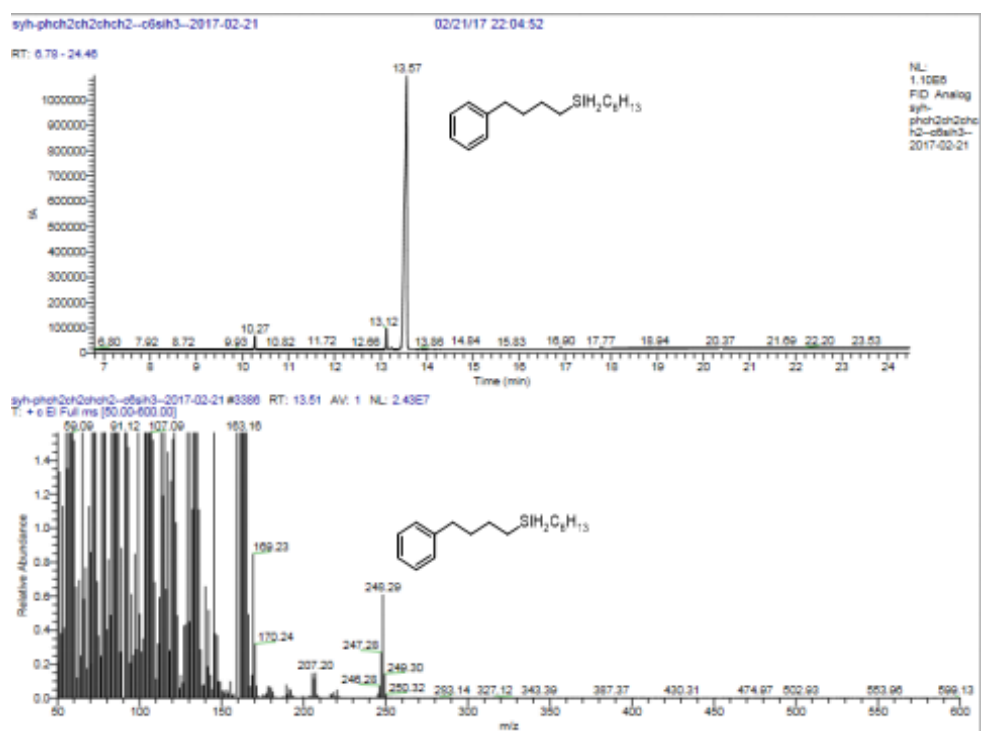

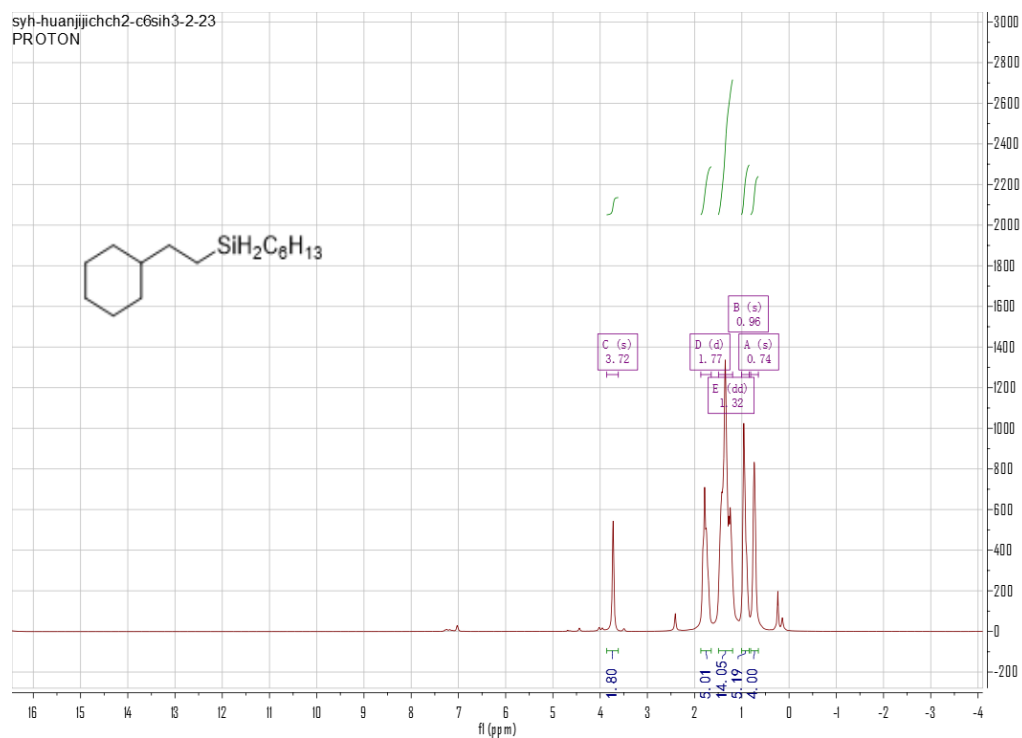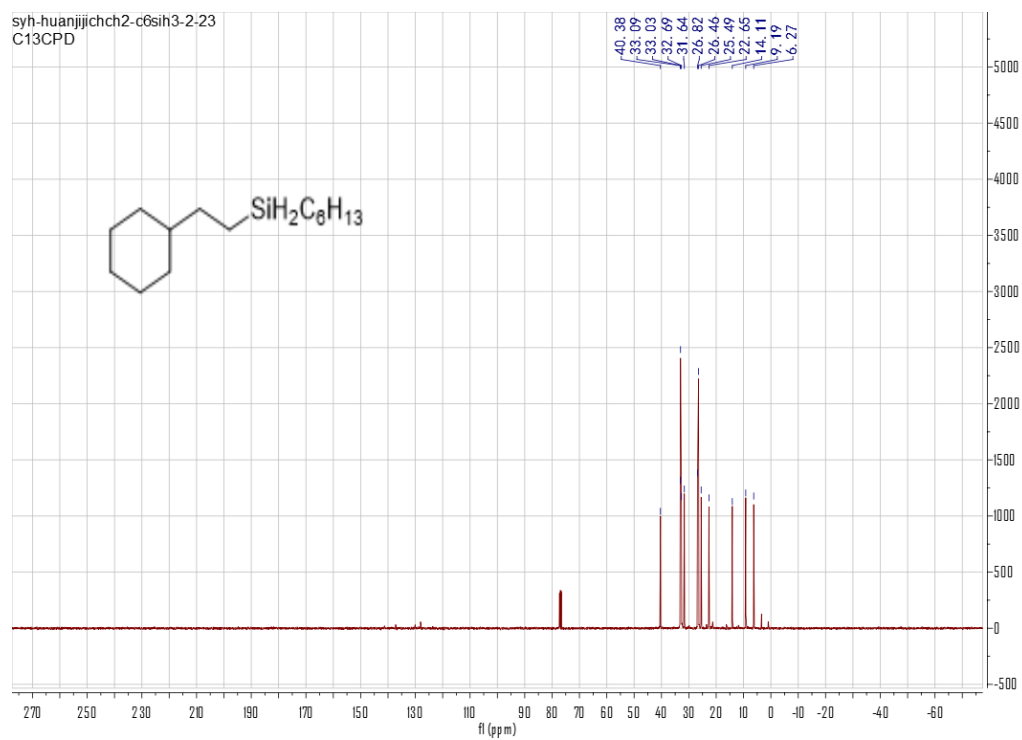

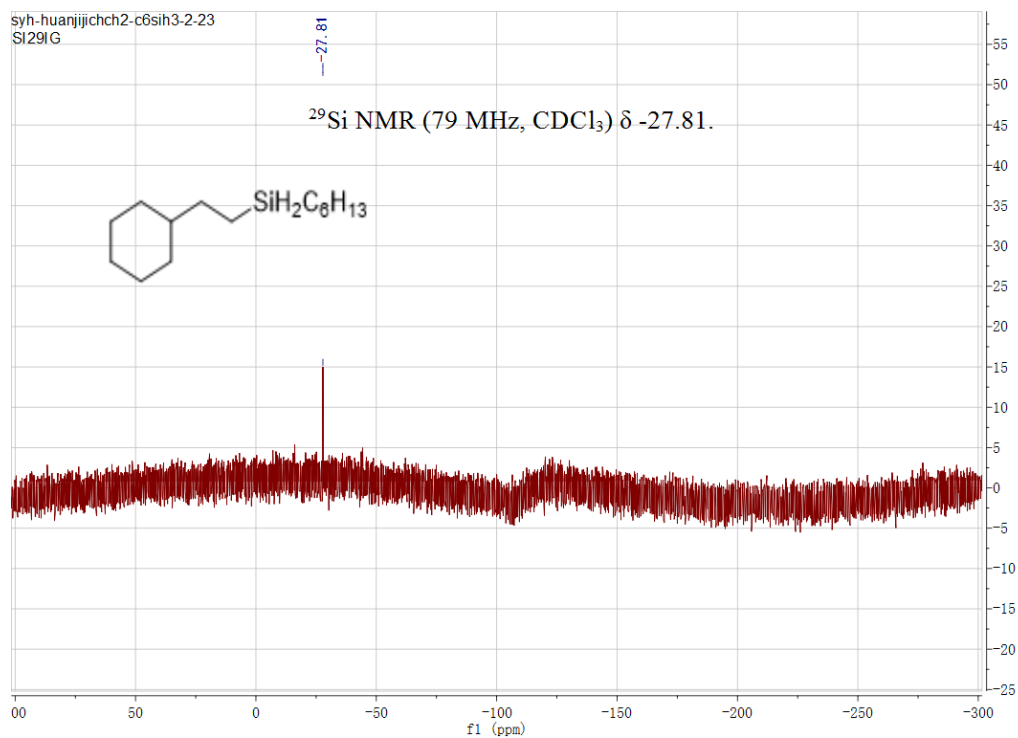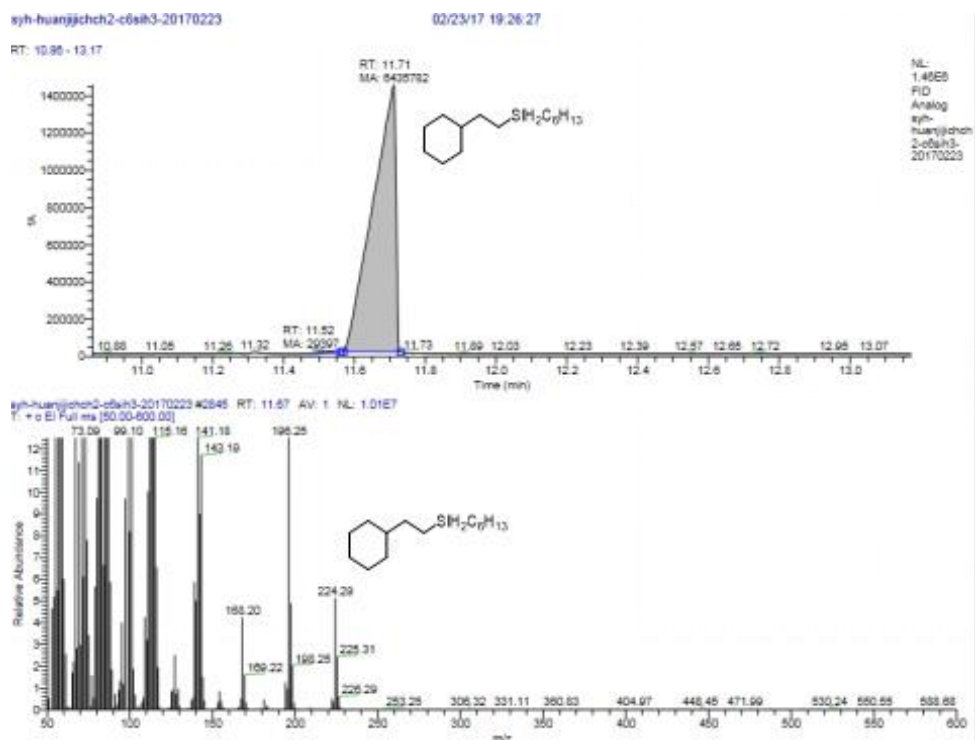

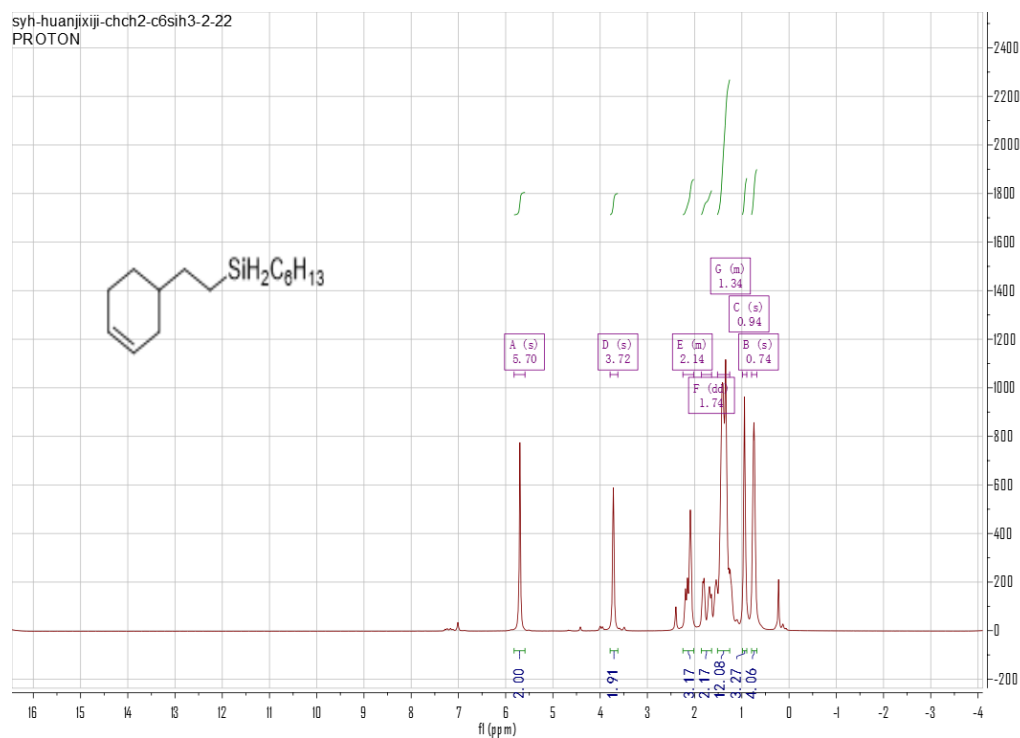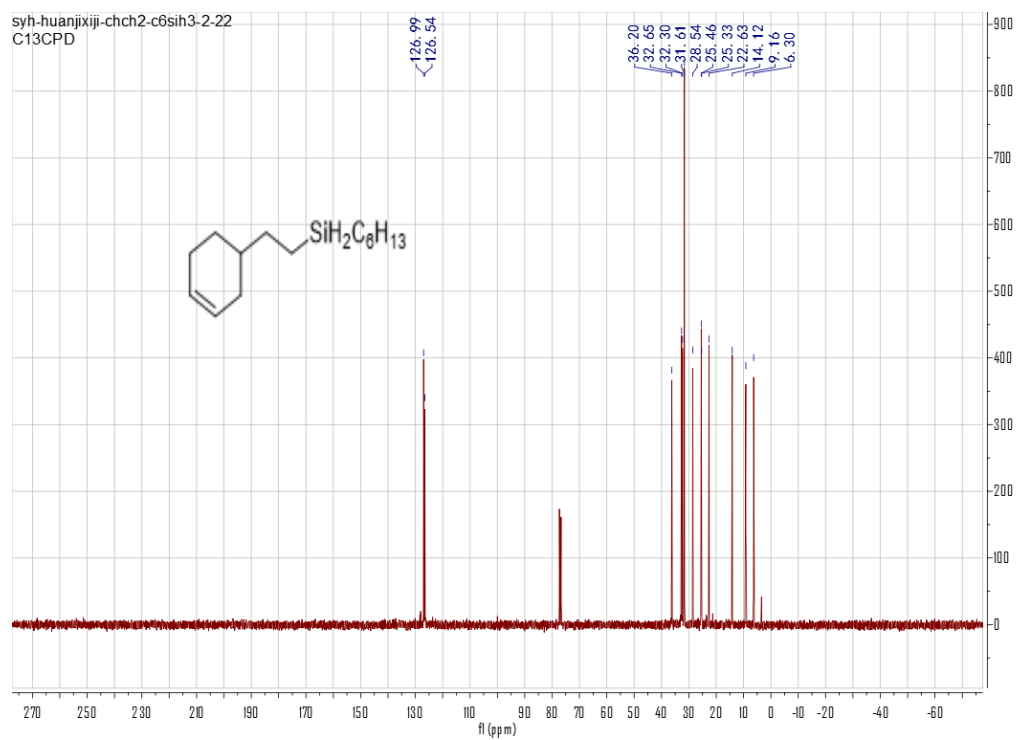

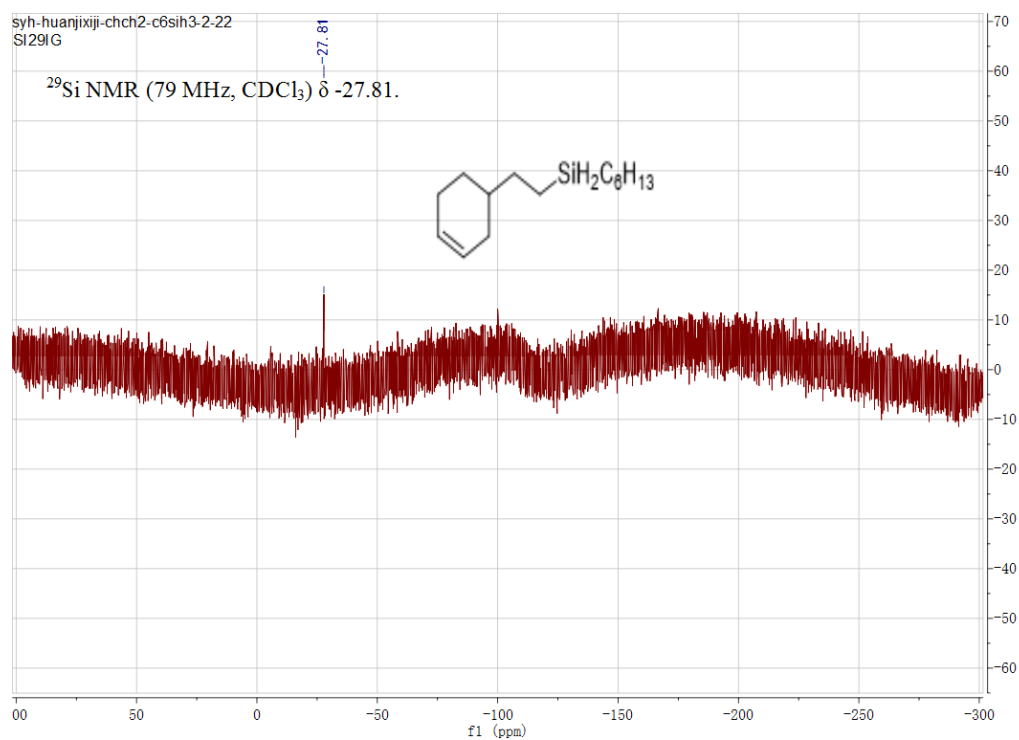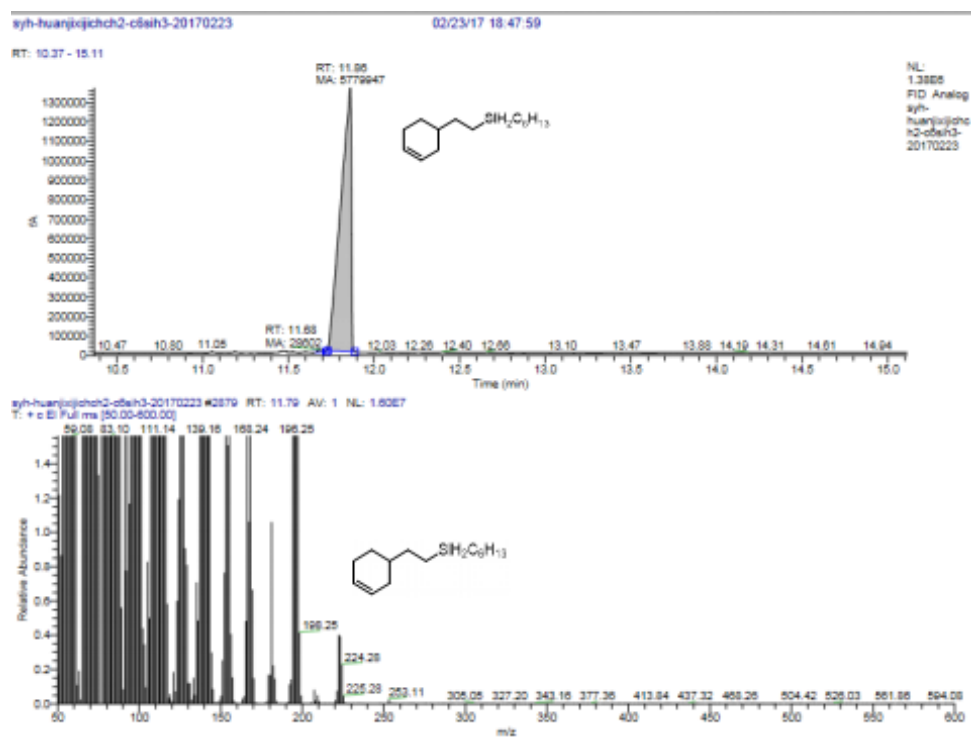

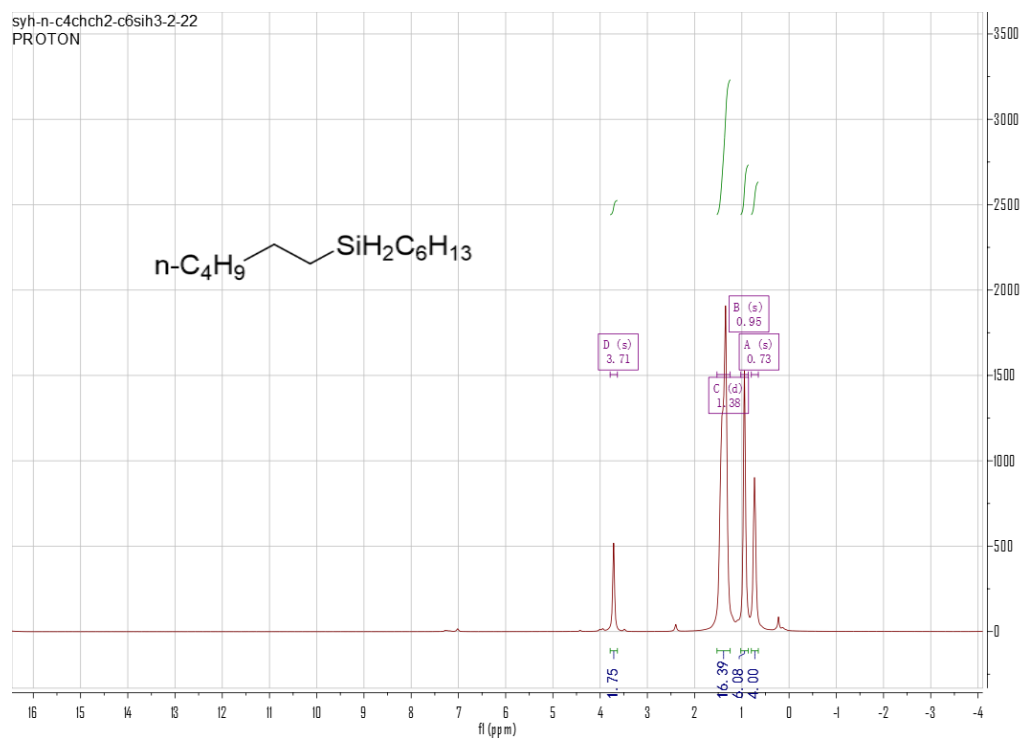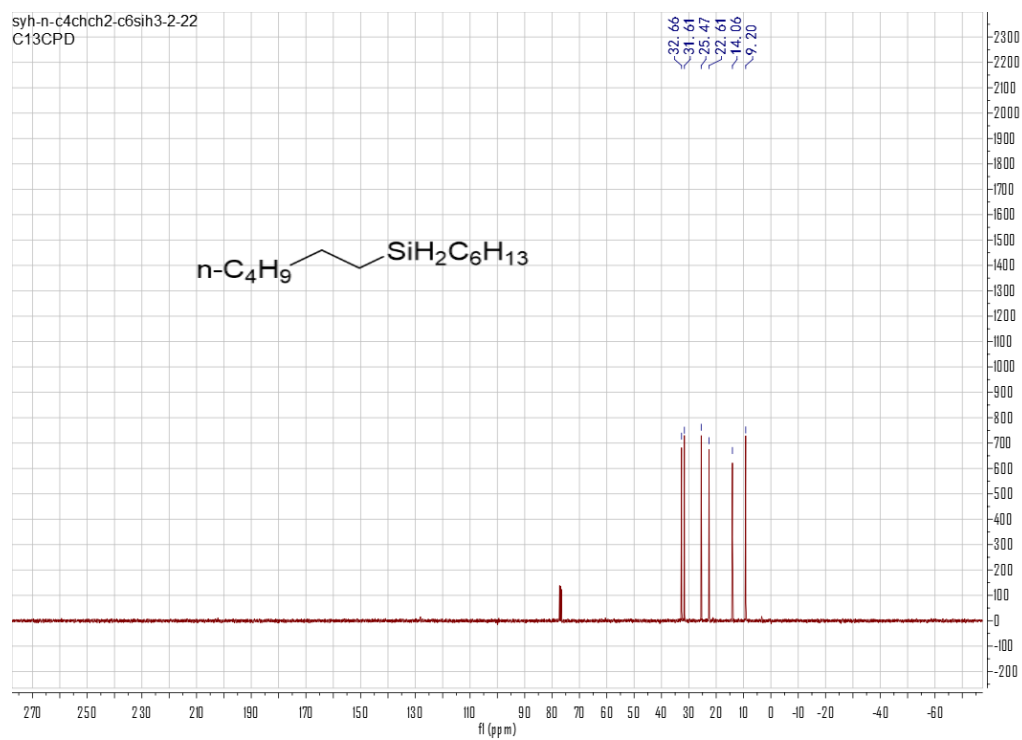

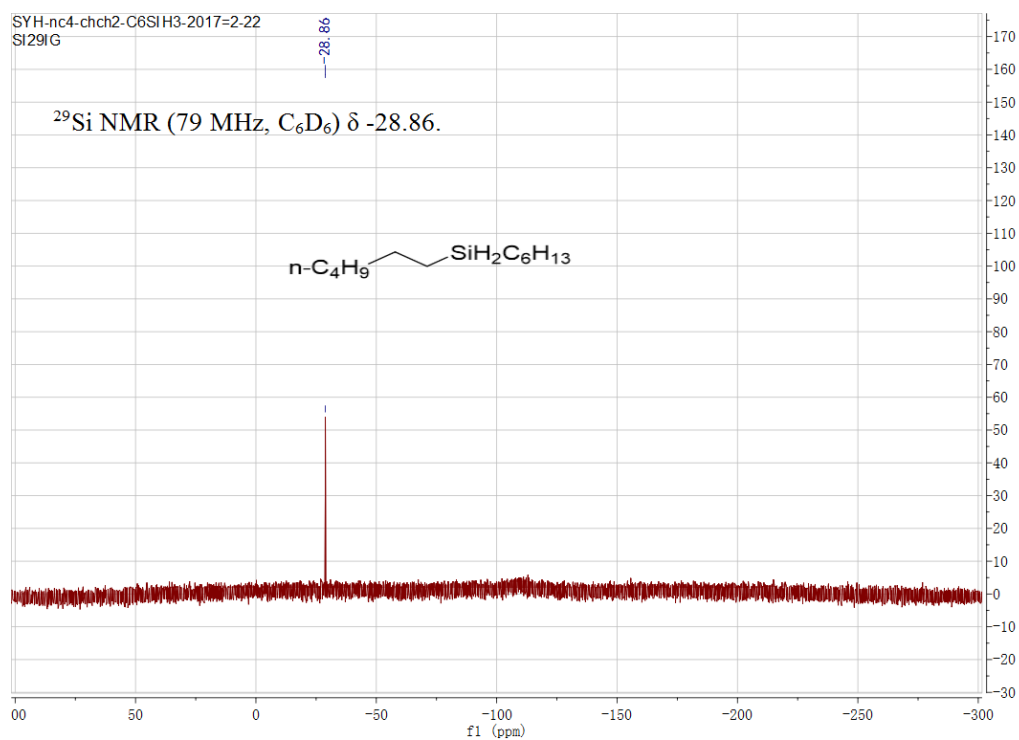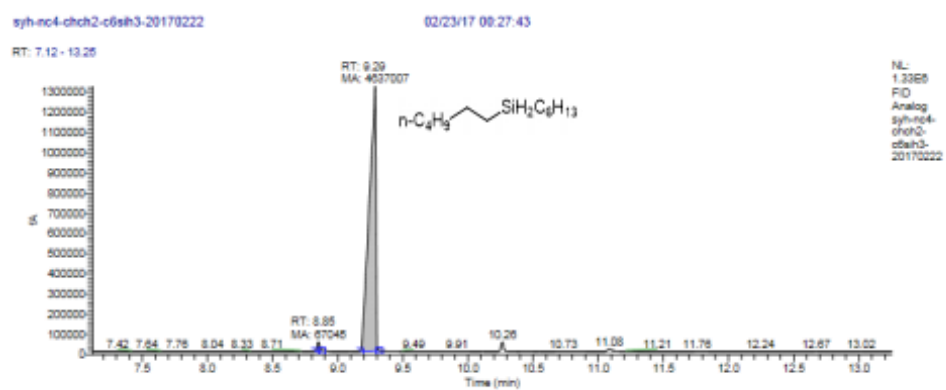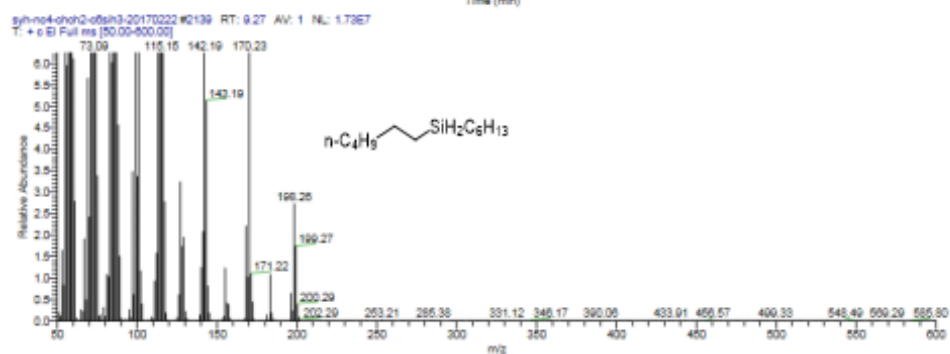



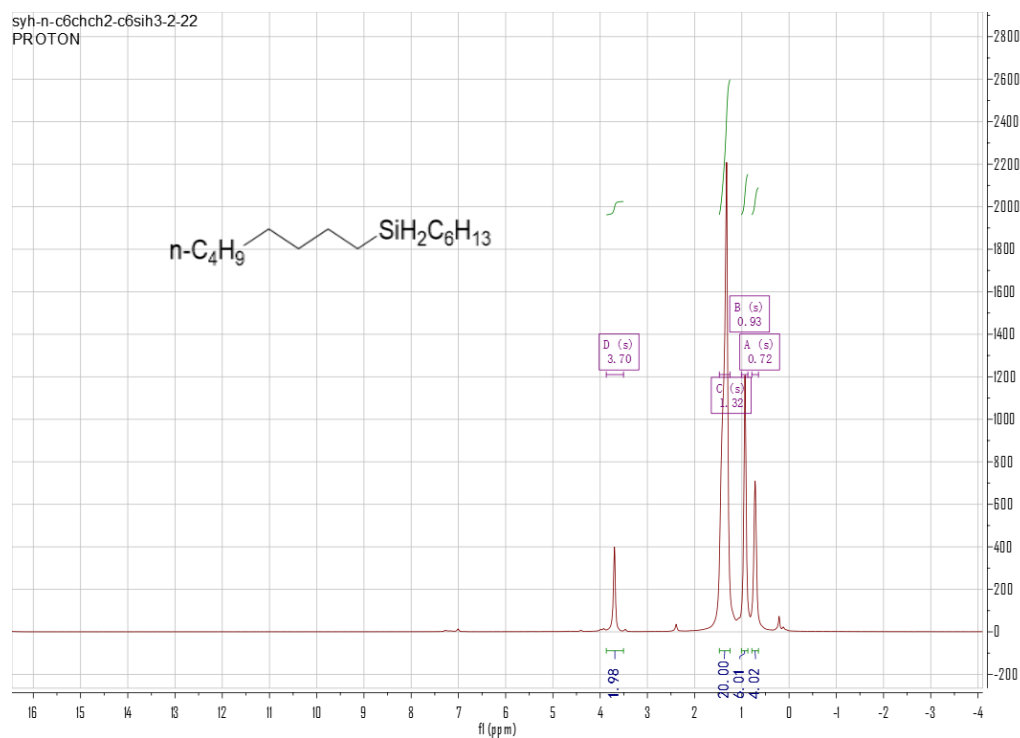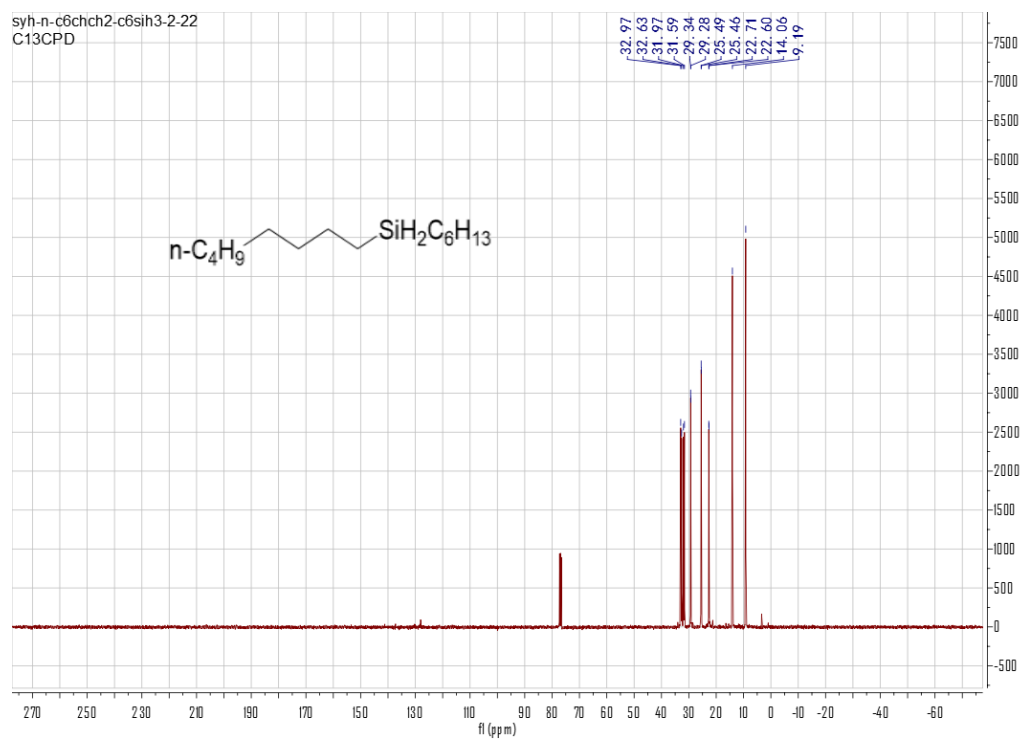

SYH-nc6-chch2-C6SIH3-2017-2-22  
SI29IG

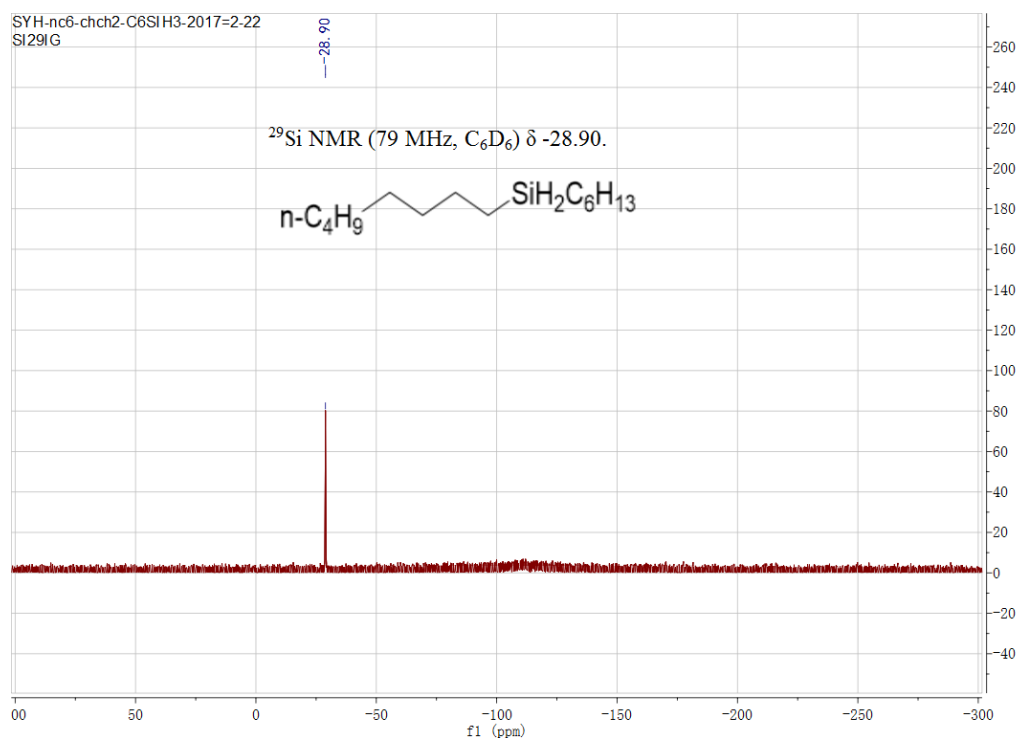

syh-nc6-chch2-c6sih3-20170222

02/23/17 01:44:32

RT: 7.90 - 15.95

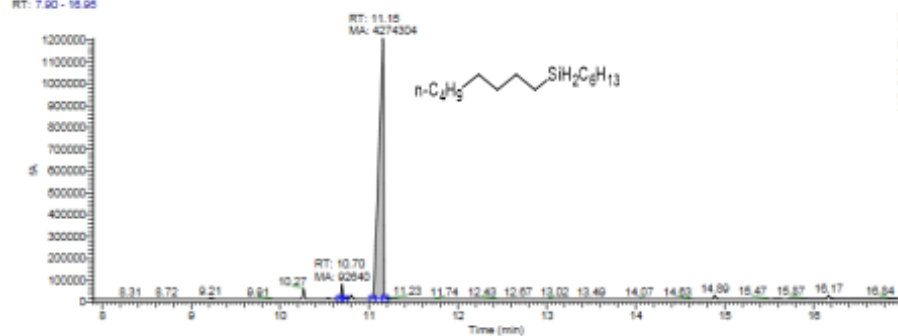

NL:  
1.21E8  
FID  
Analog  
syh-nc6-  
chch2-  
c6sih3-  
20170222

syh-nc6-chch2-c6sih3-20170222 #2878 RT: 11.11 AV: 1 NL: 1.39E7  
T: + o 6) Full ms (50.00-600.00)

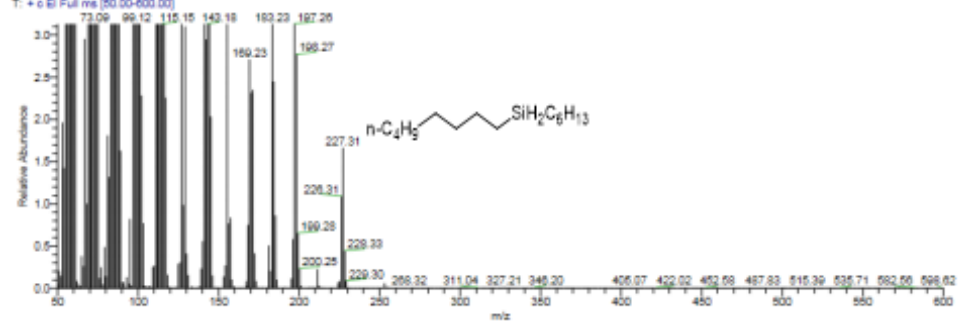

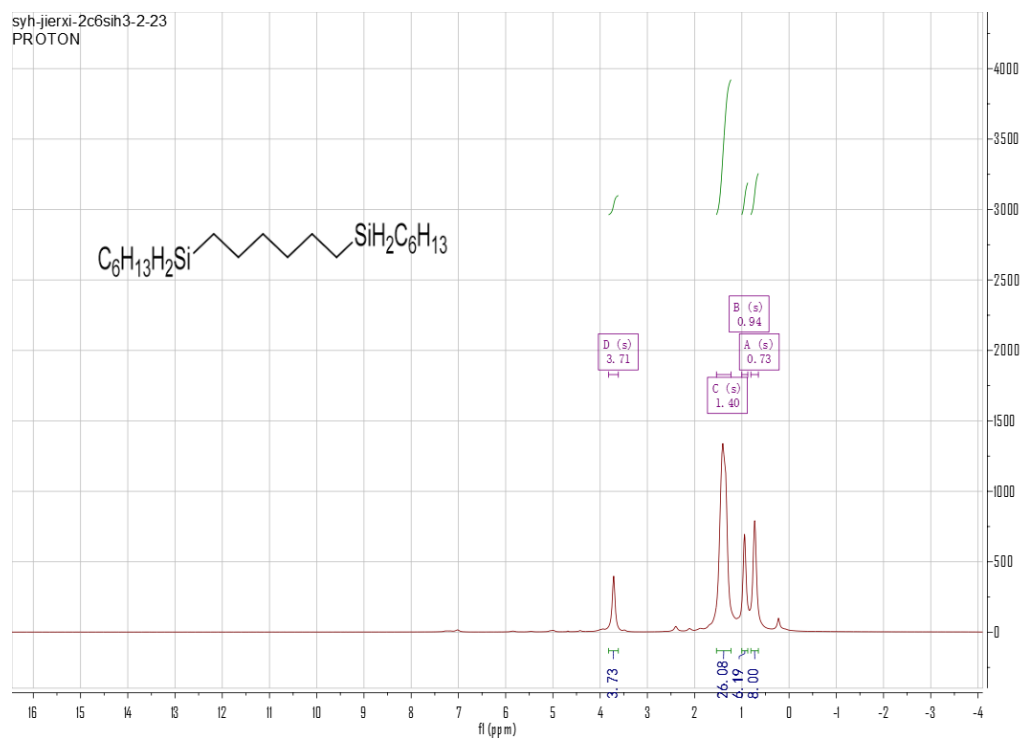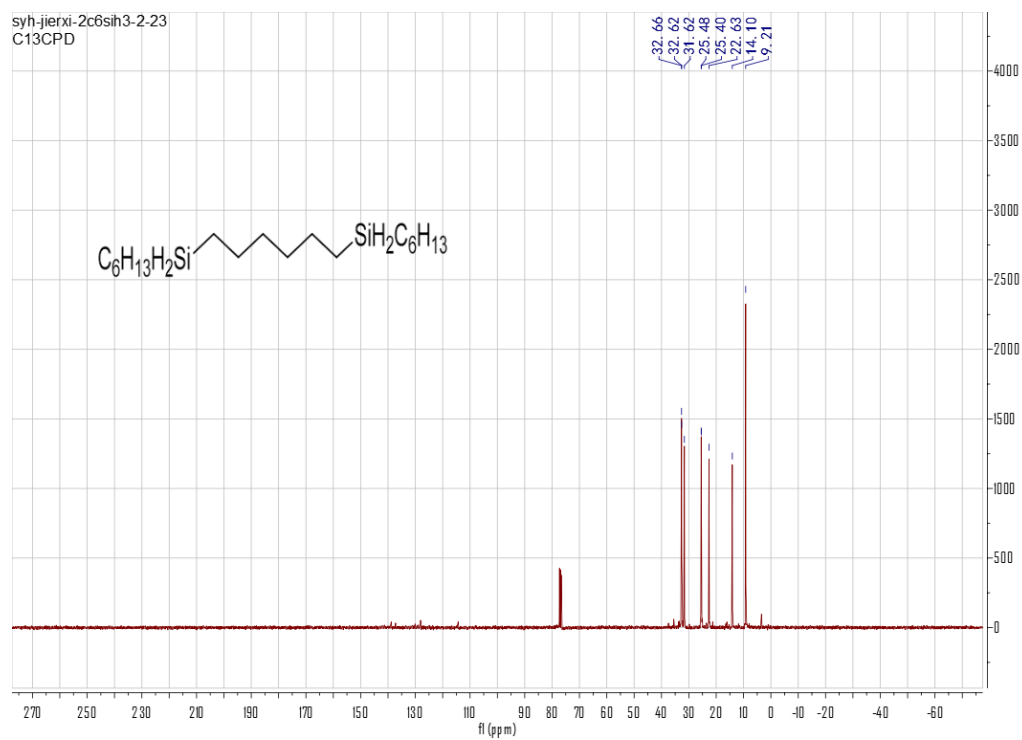

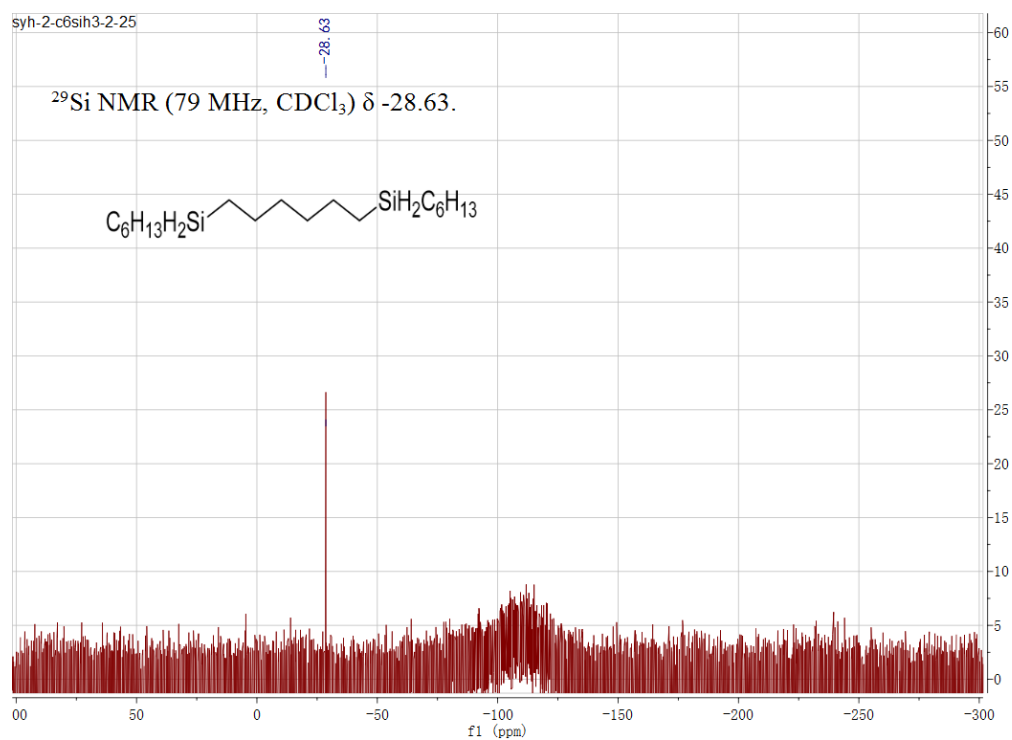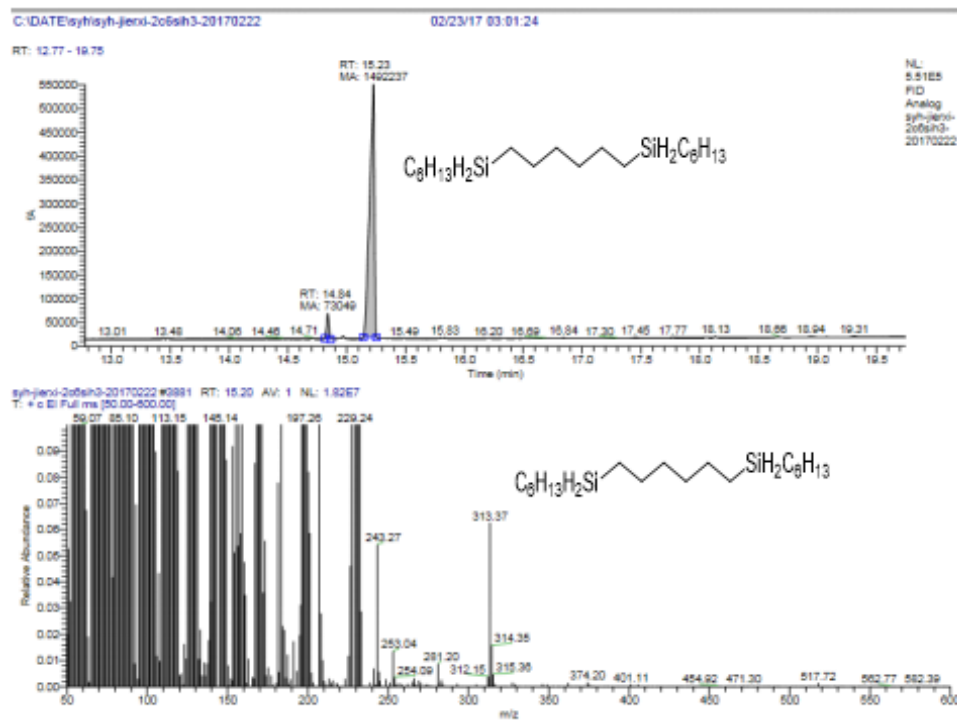

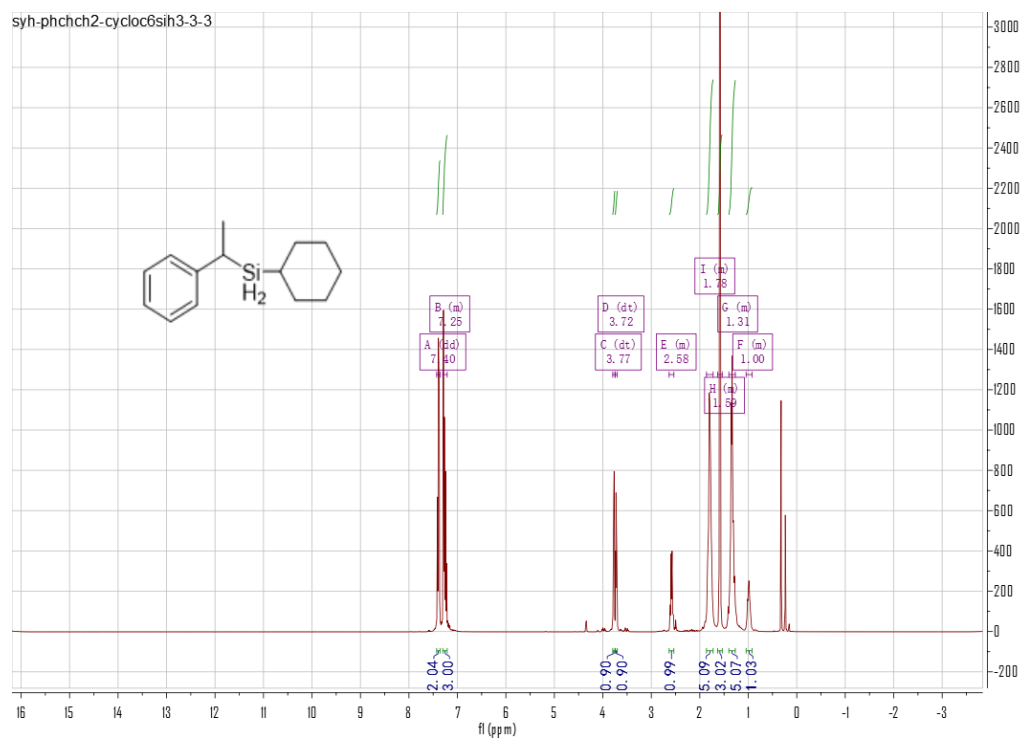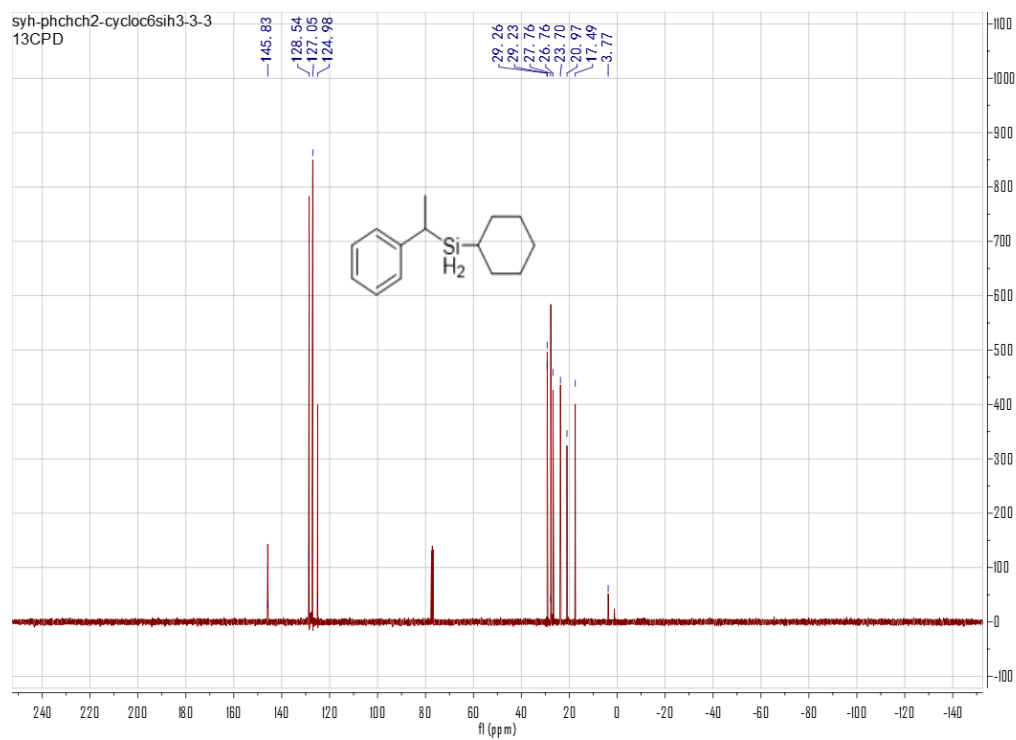

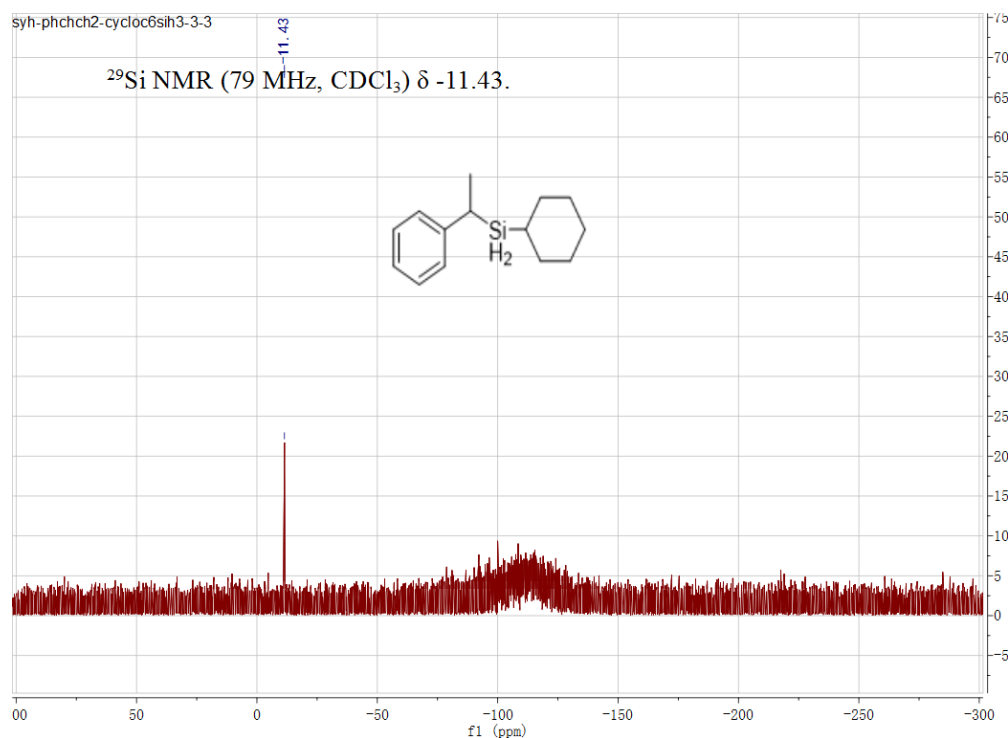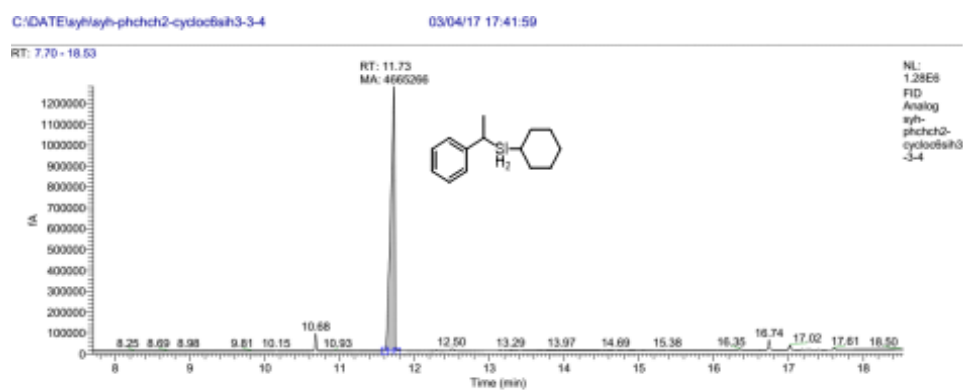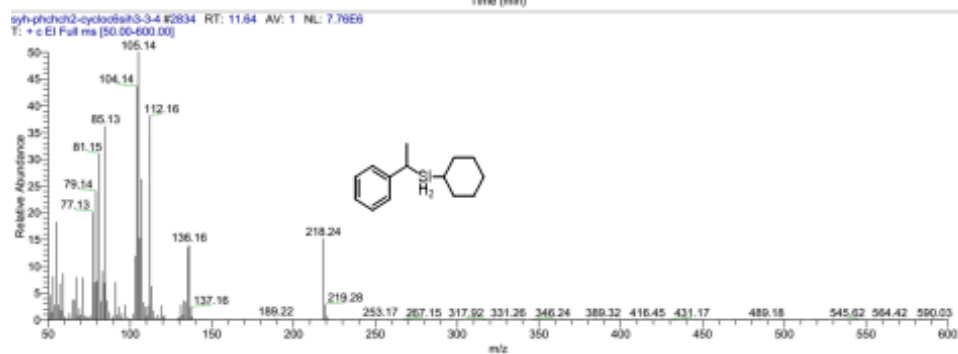

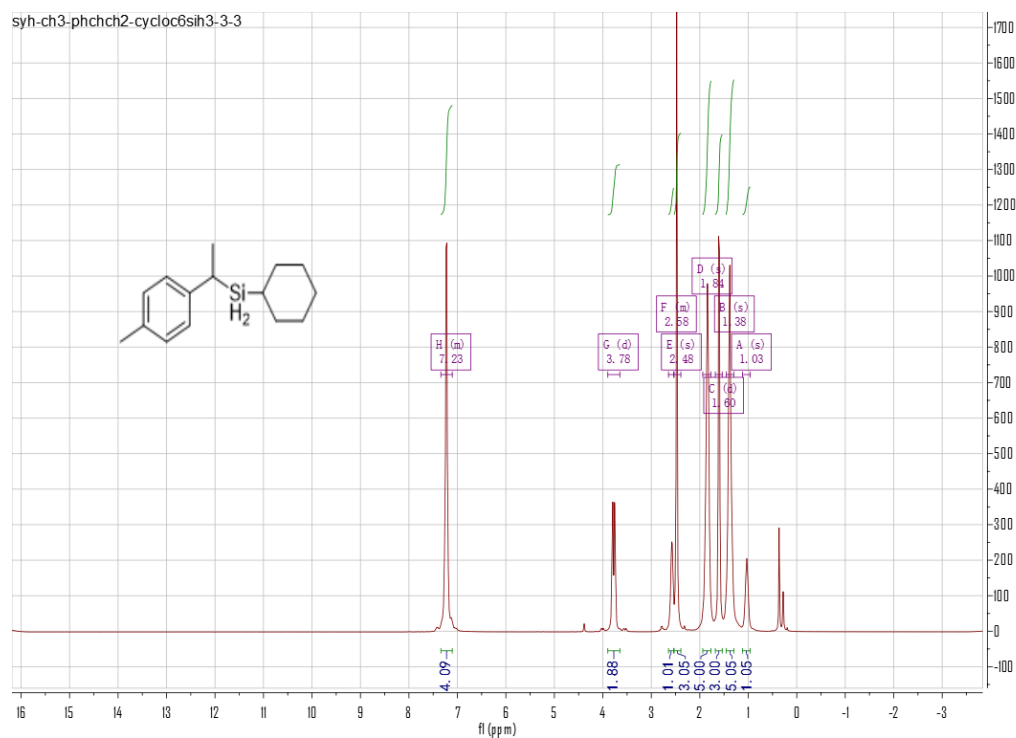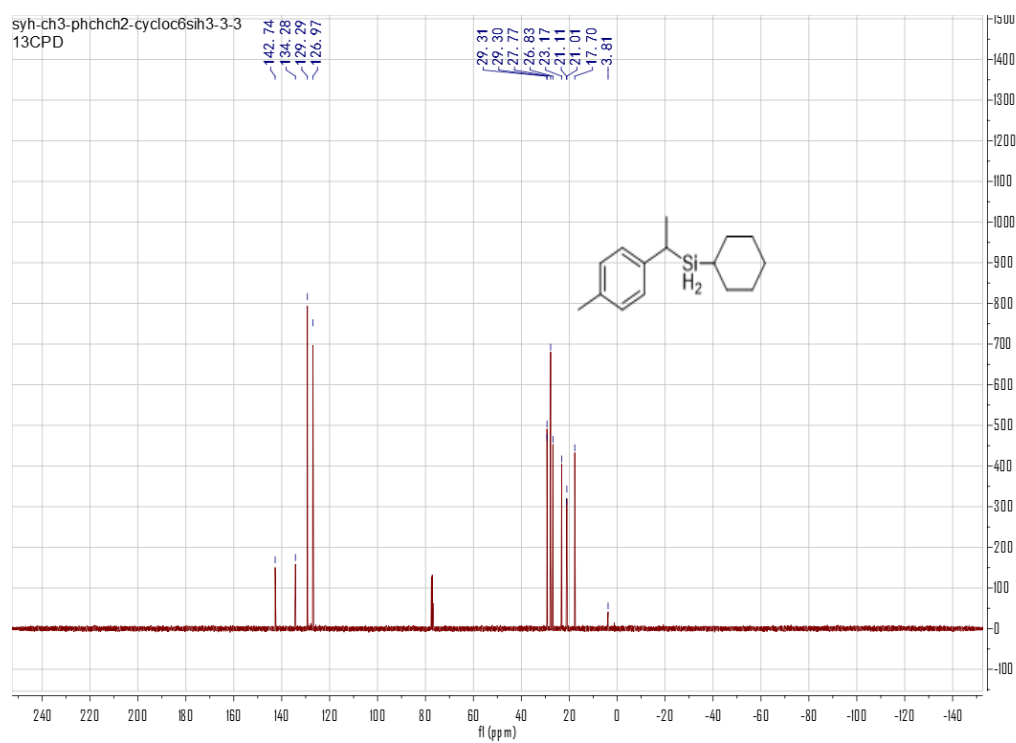

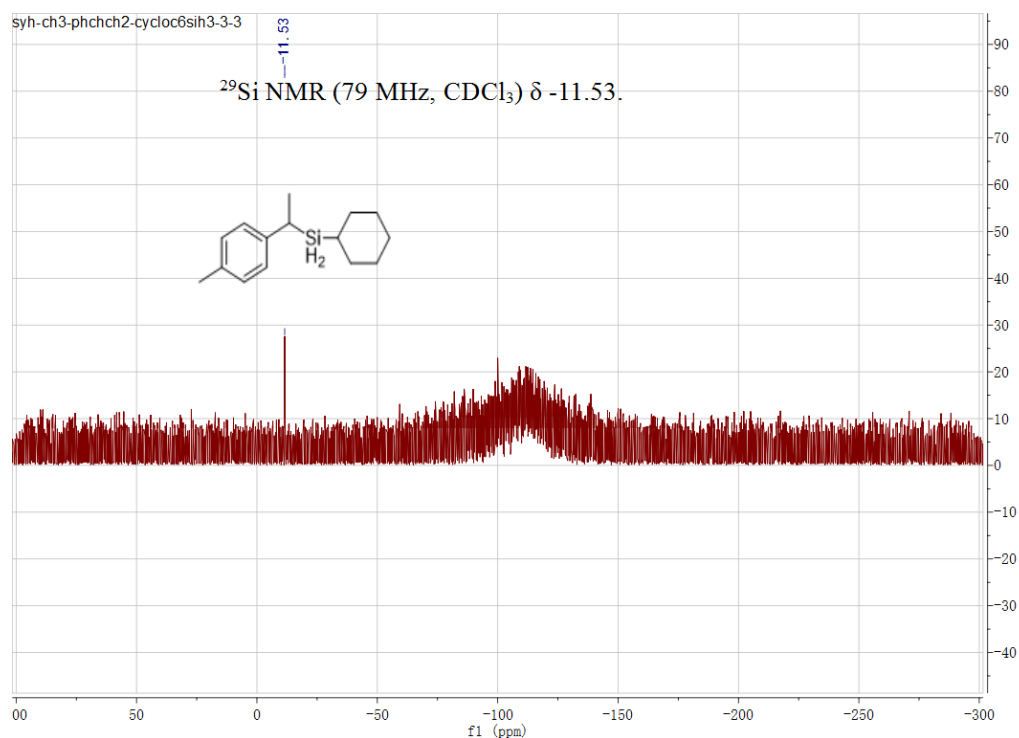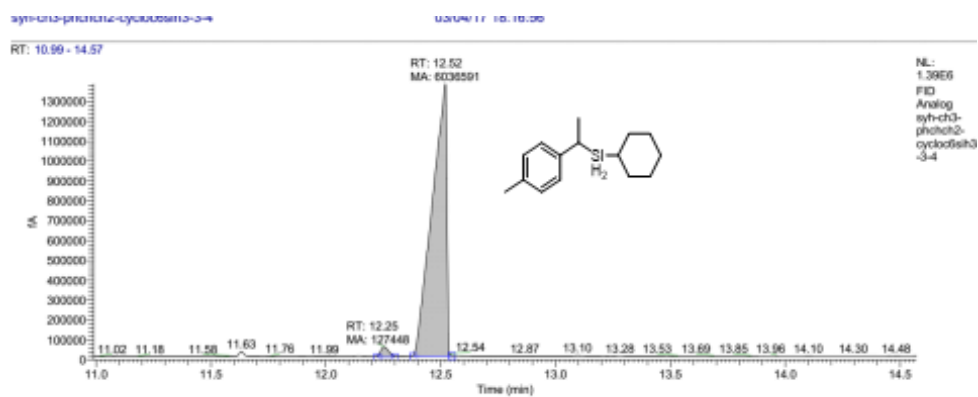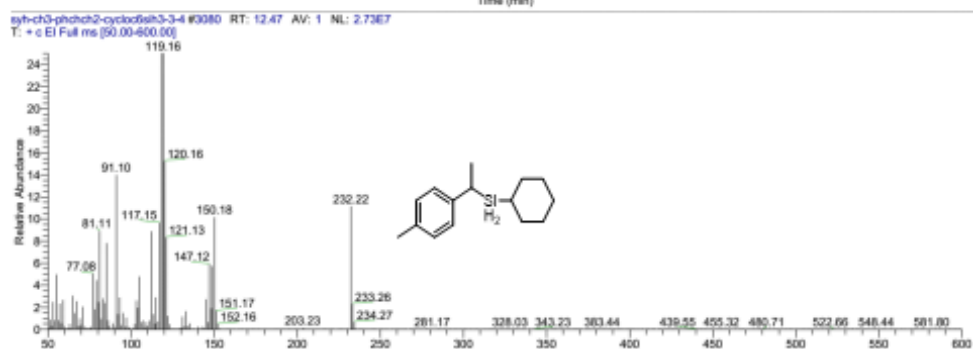



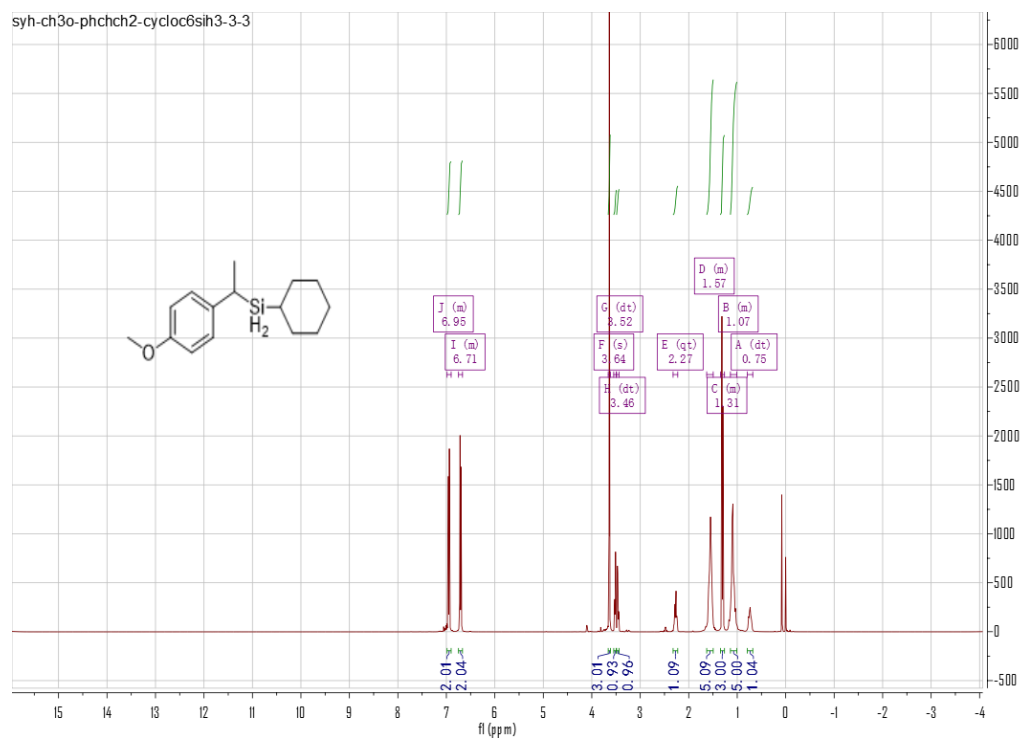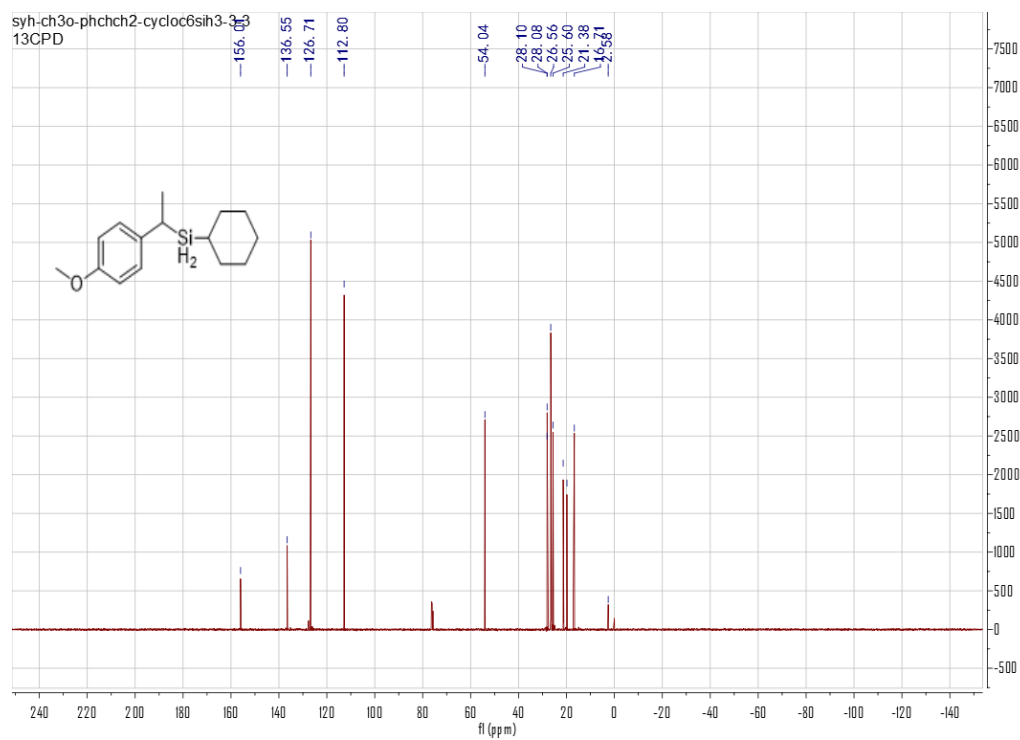

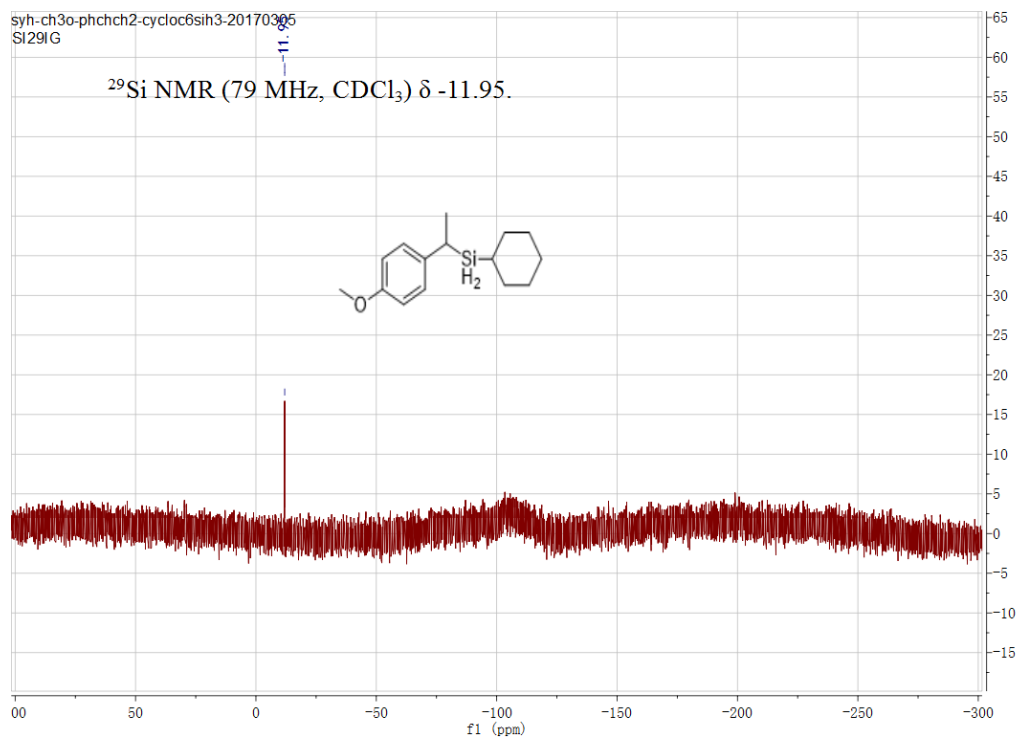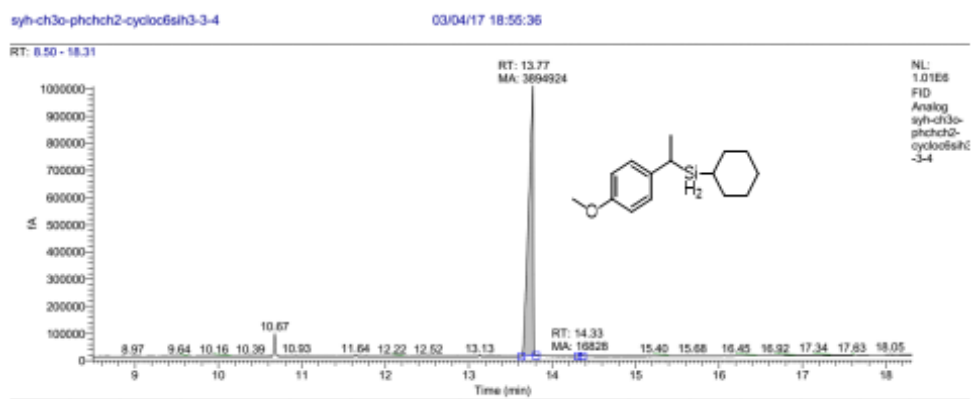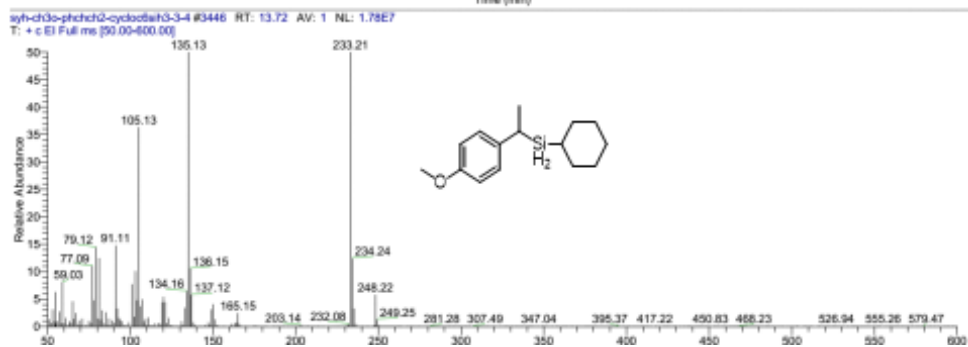

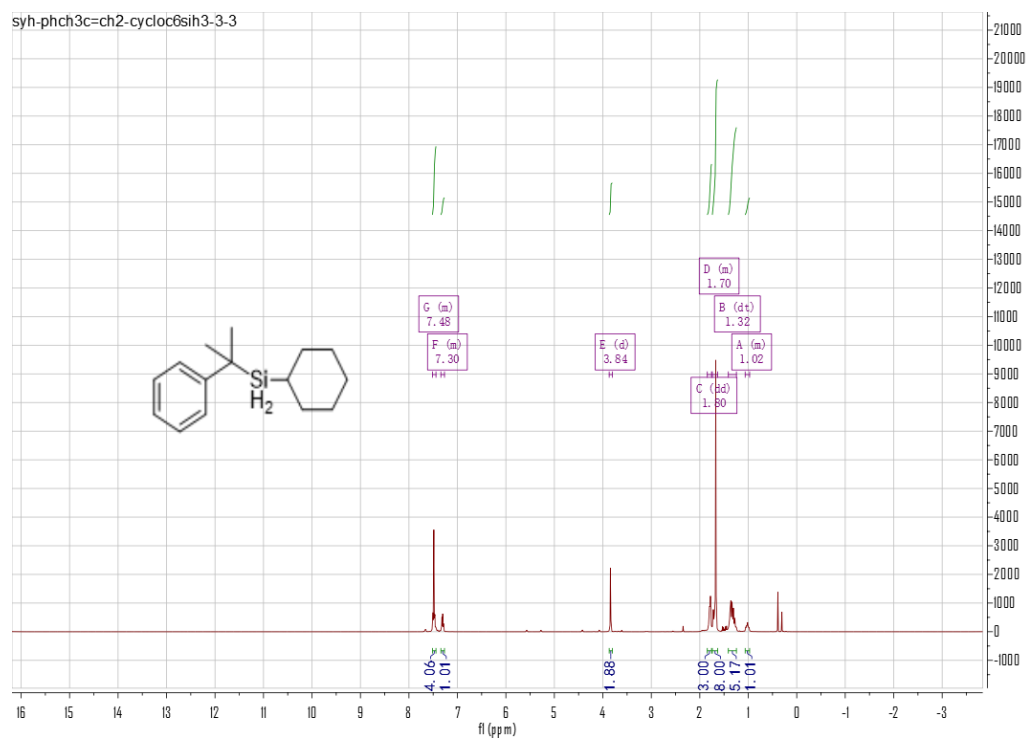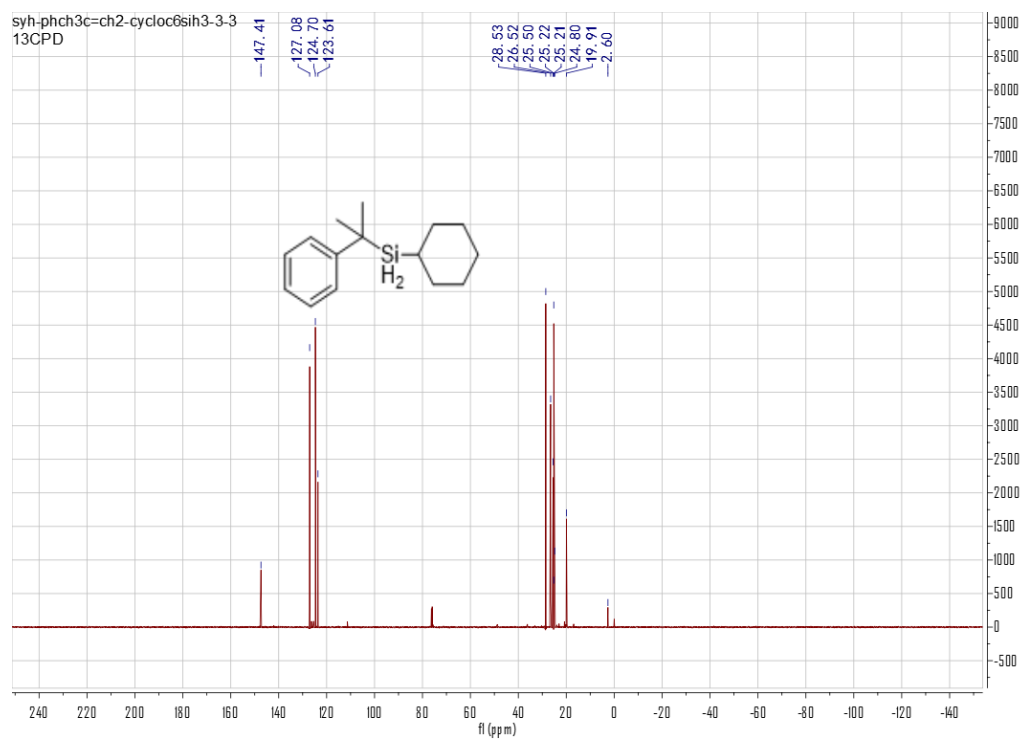

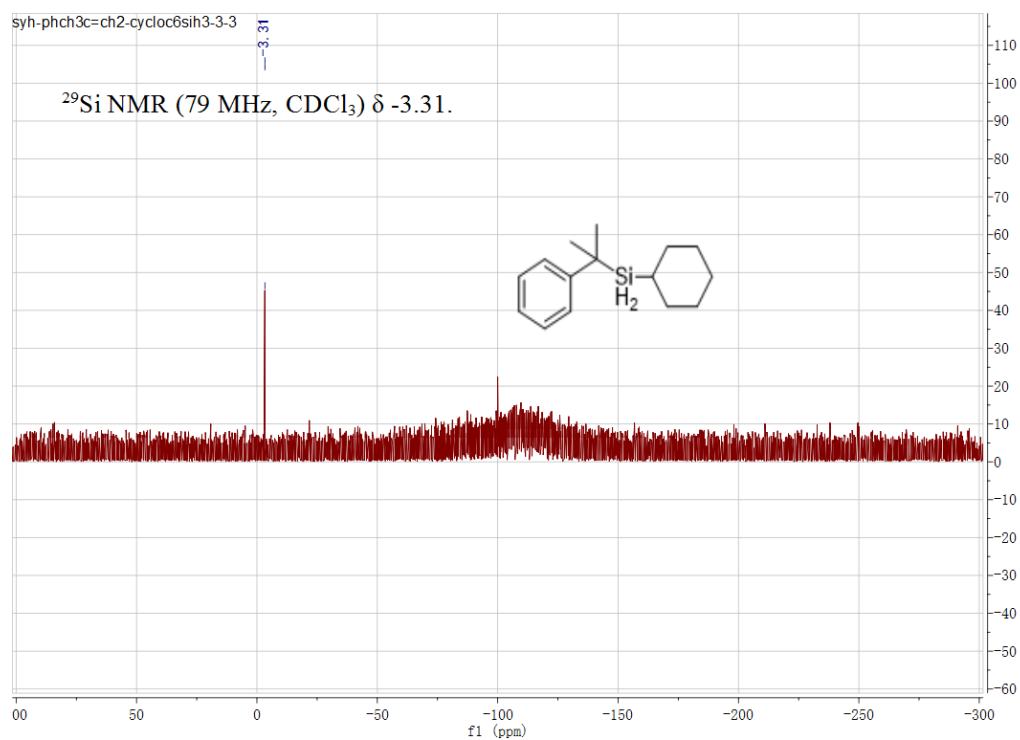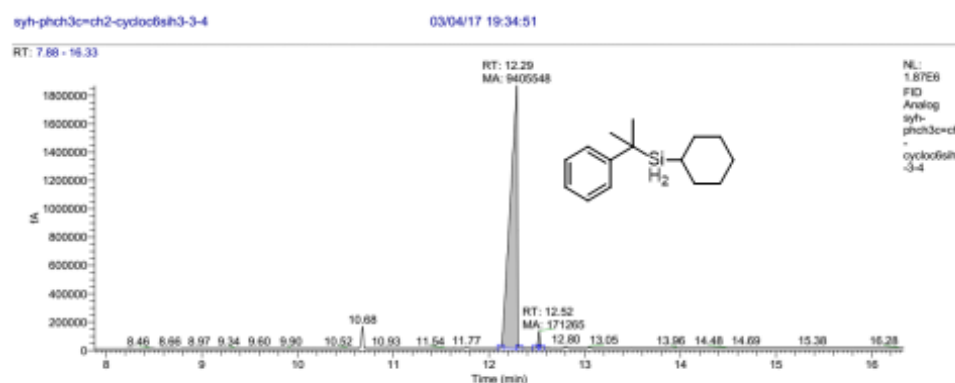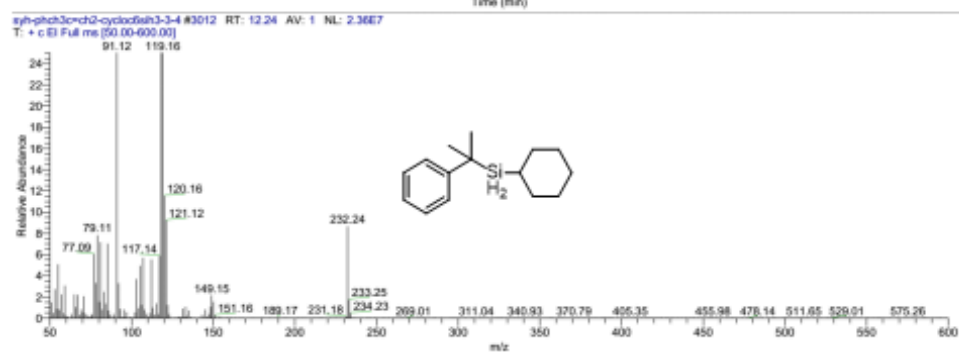

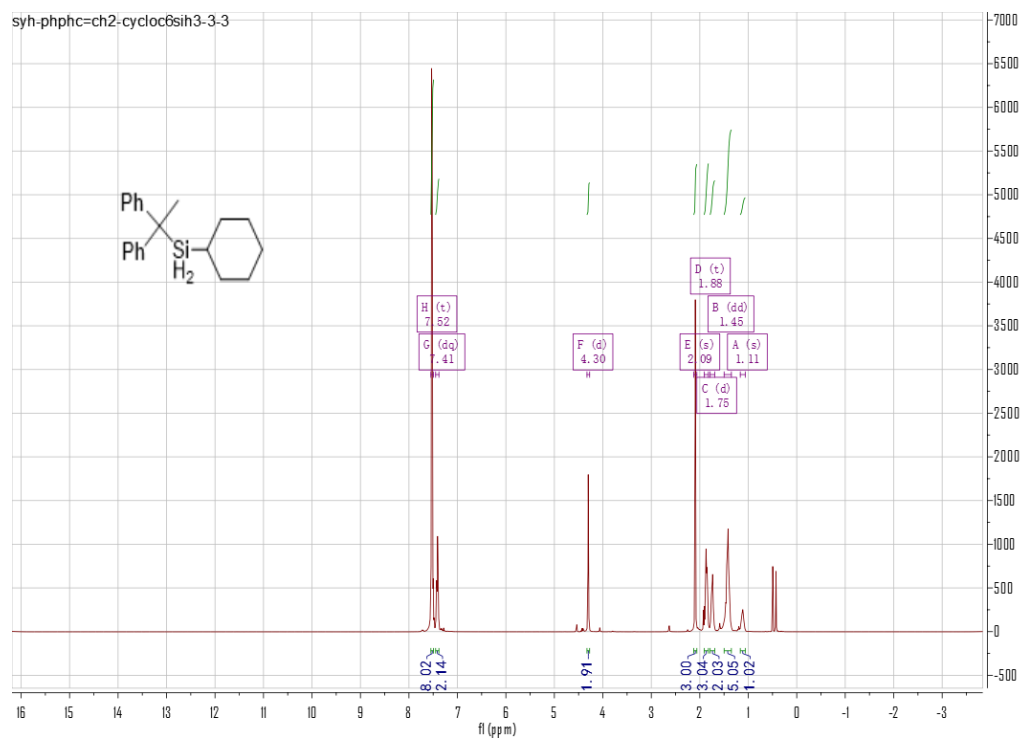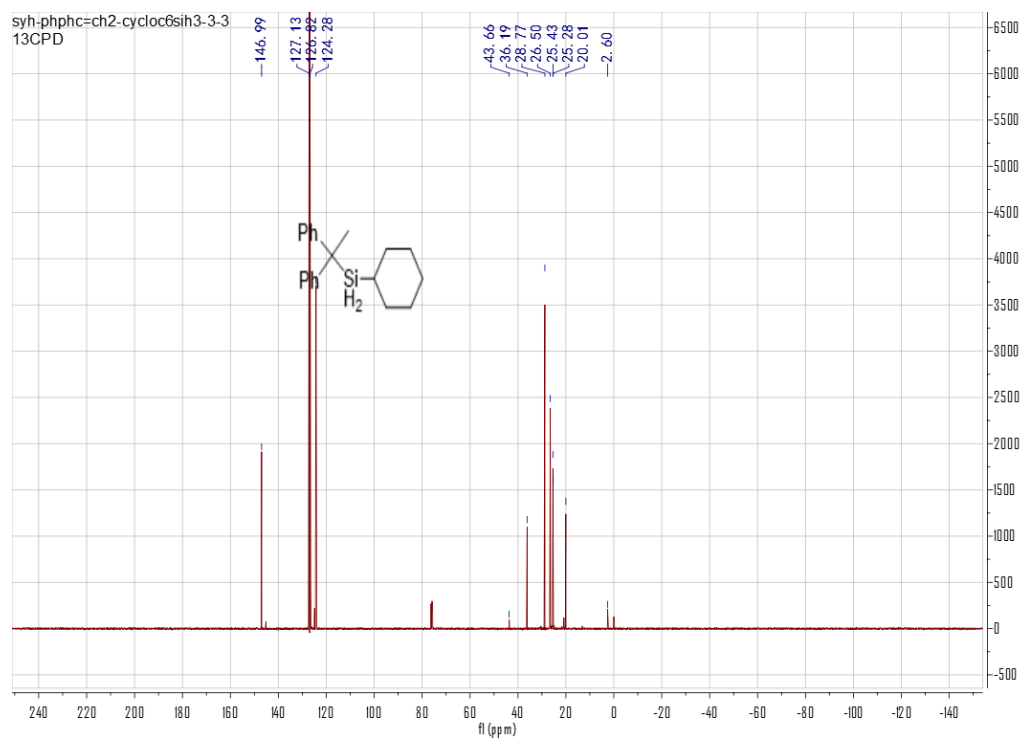

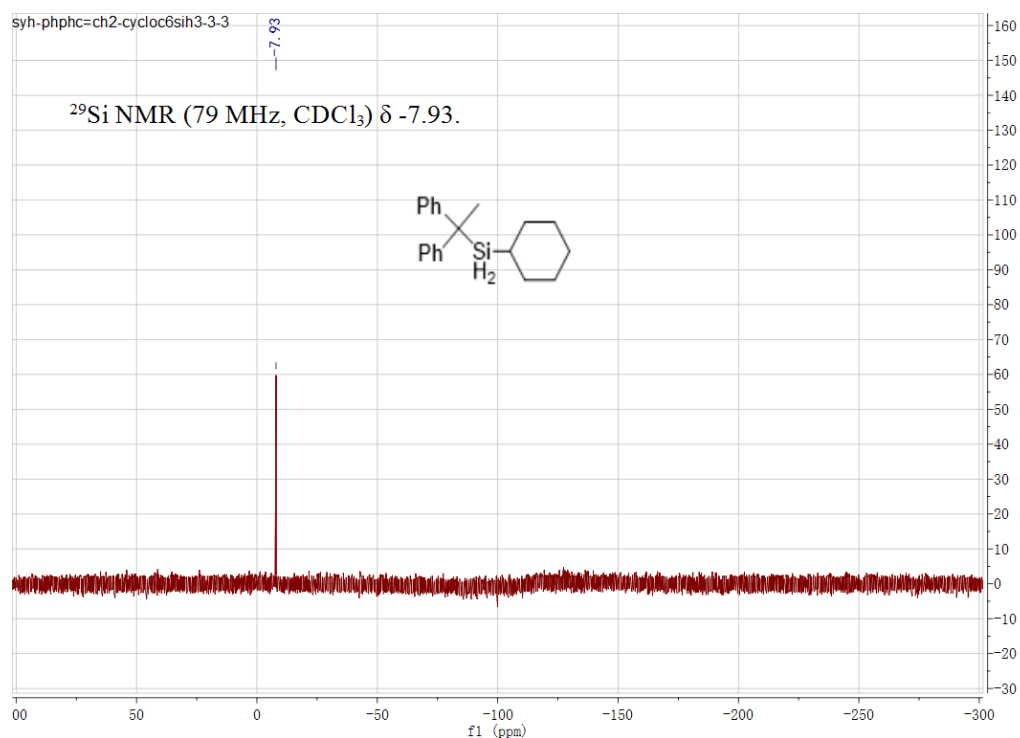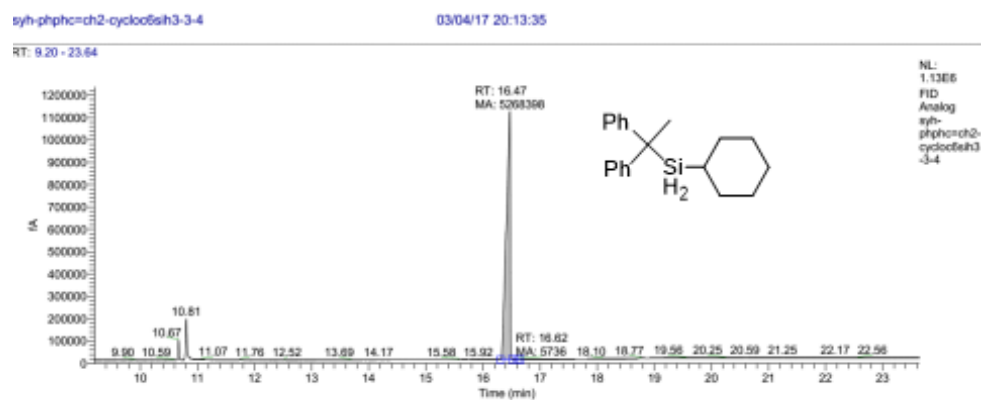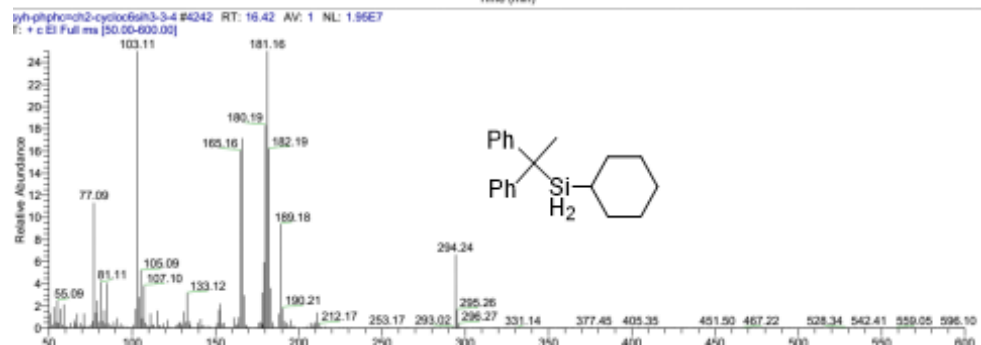

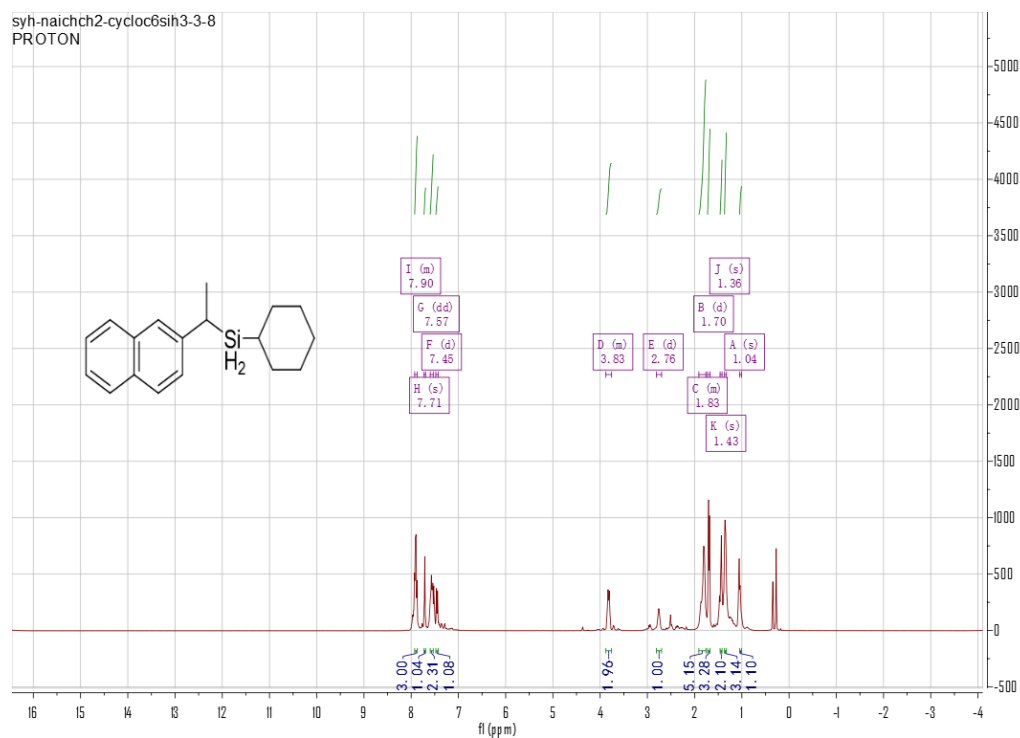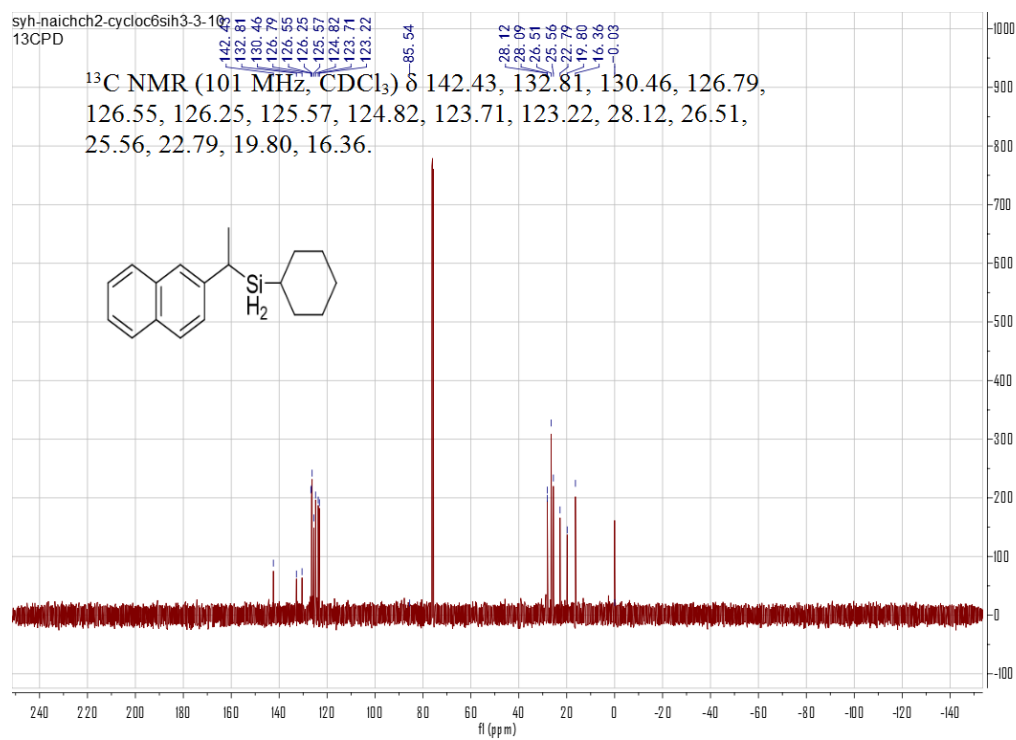

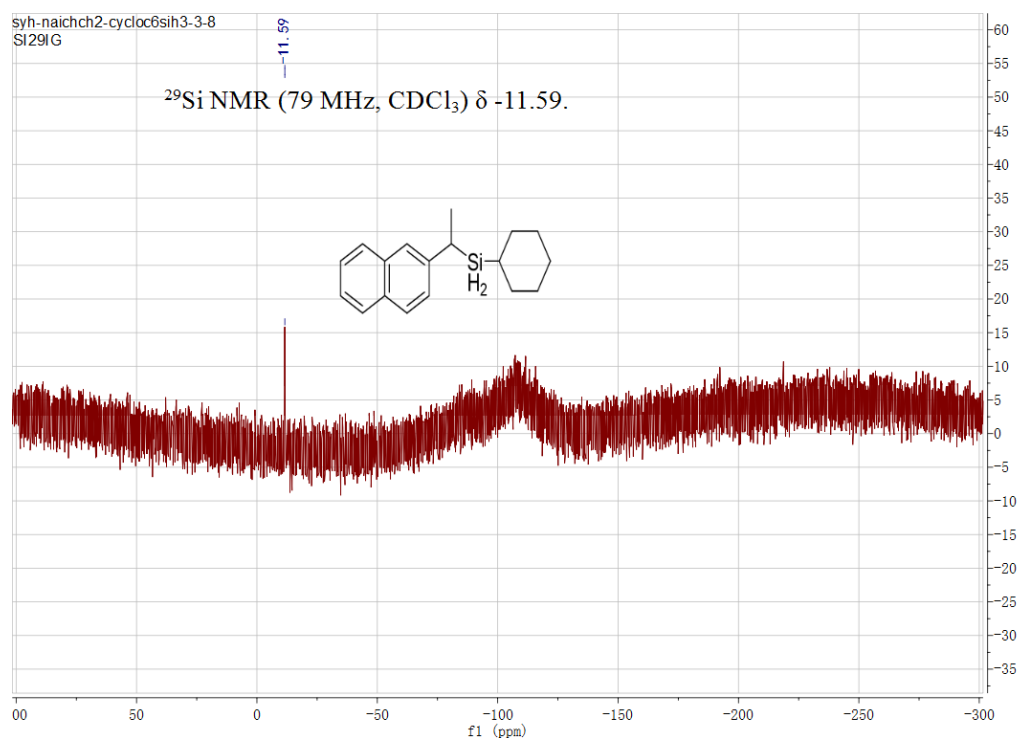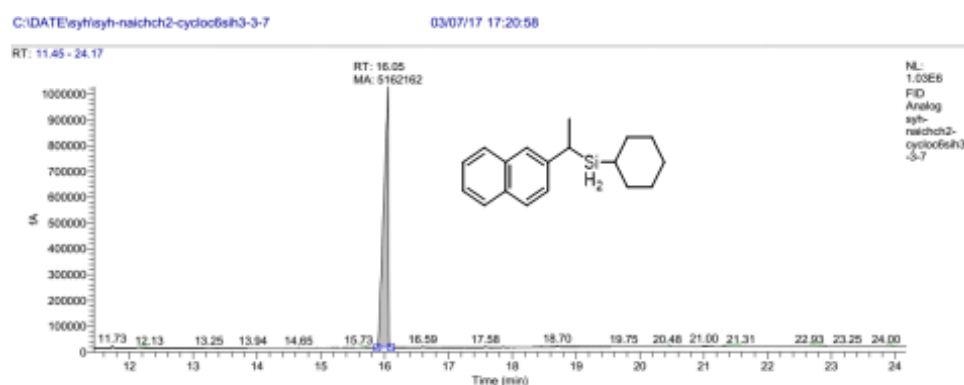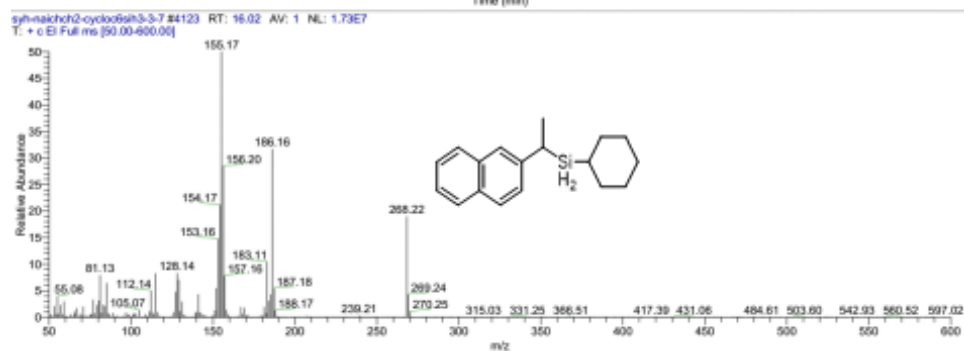



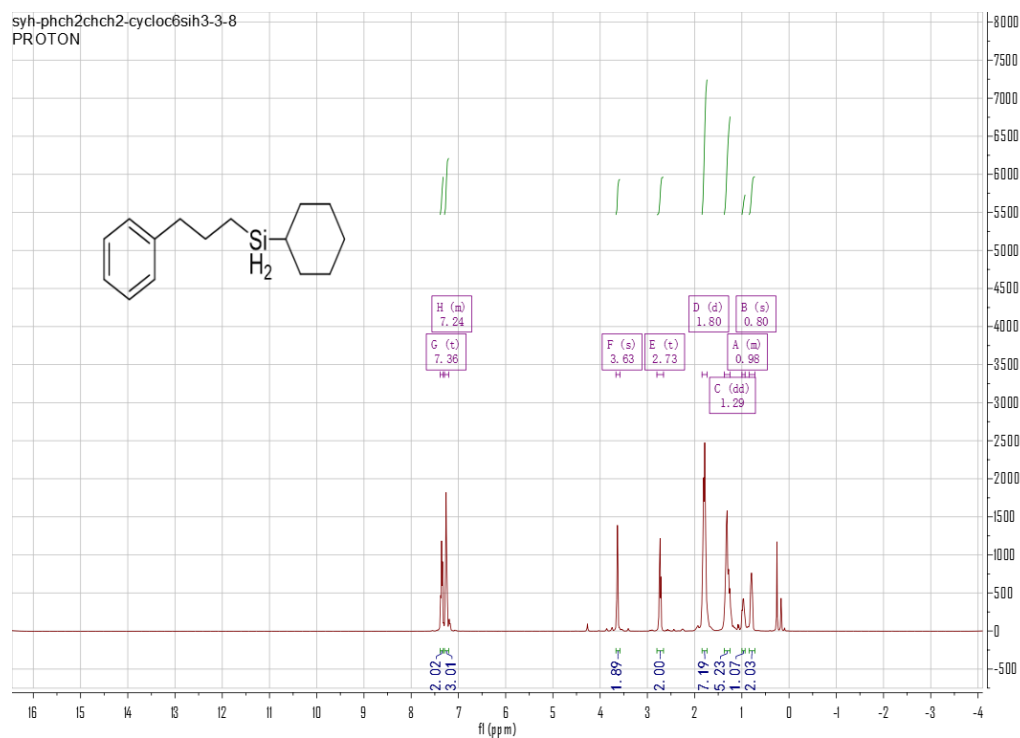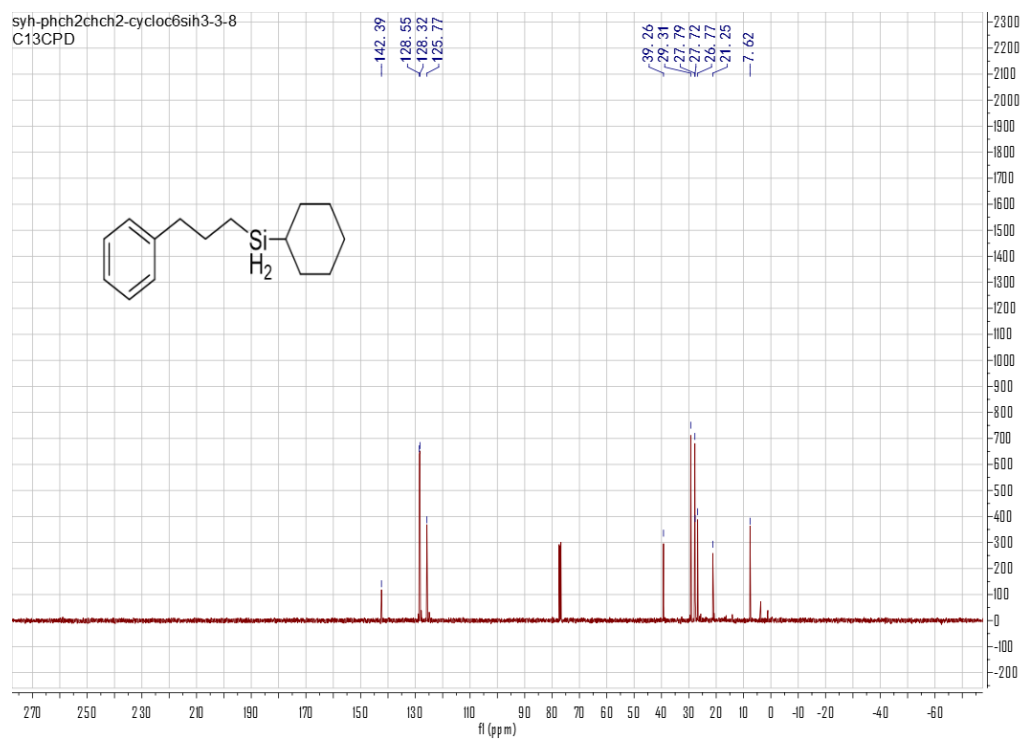

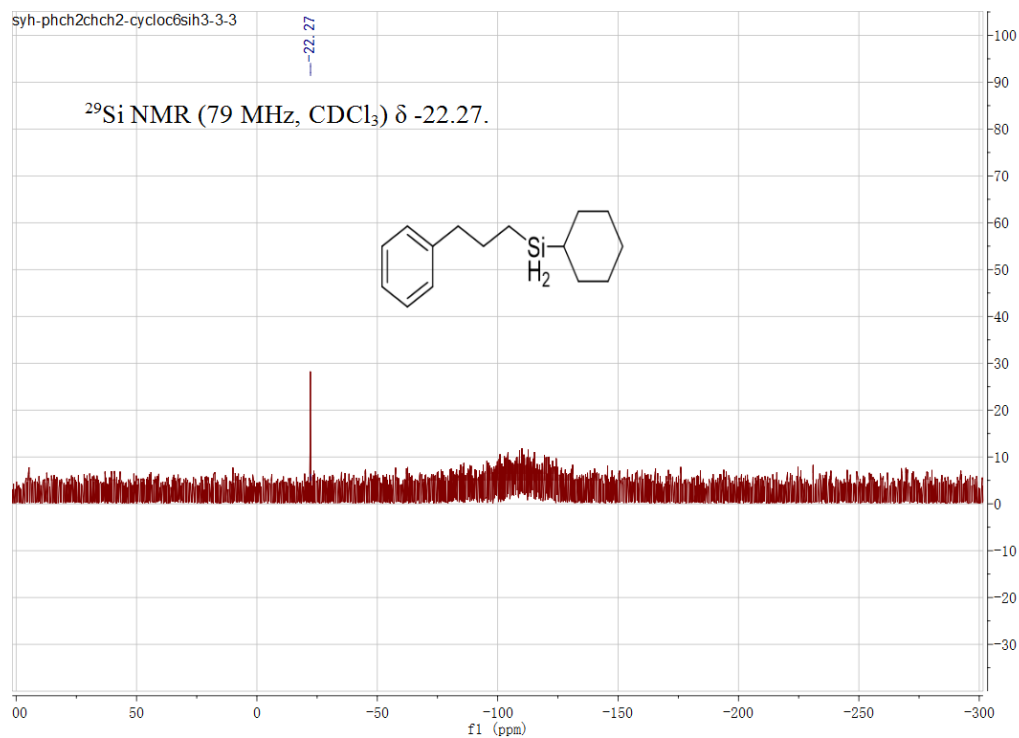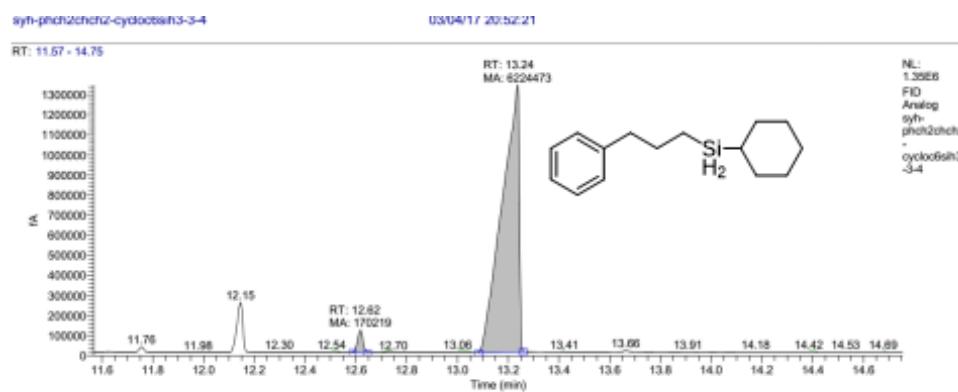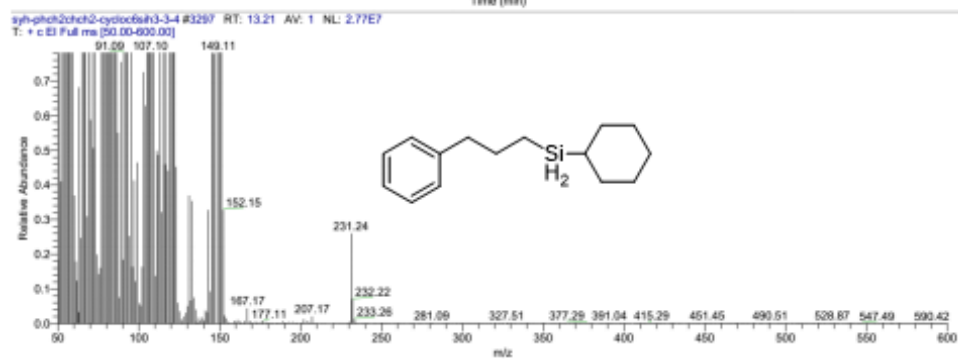

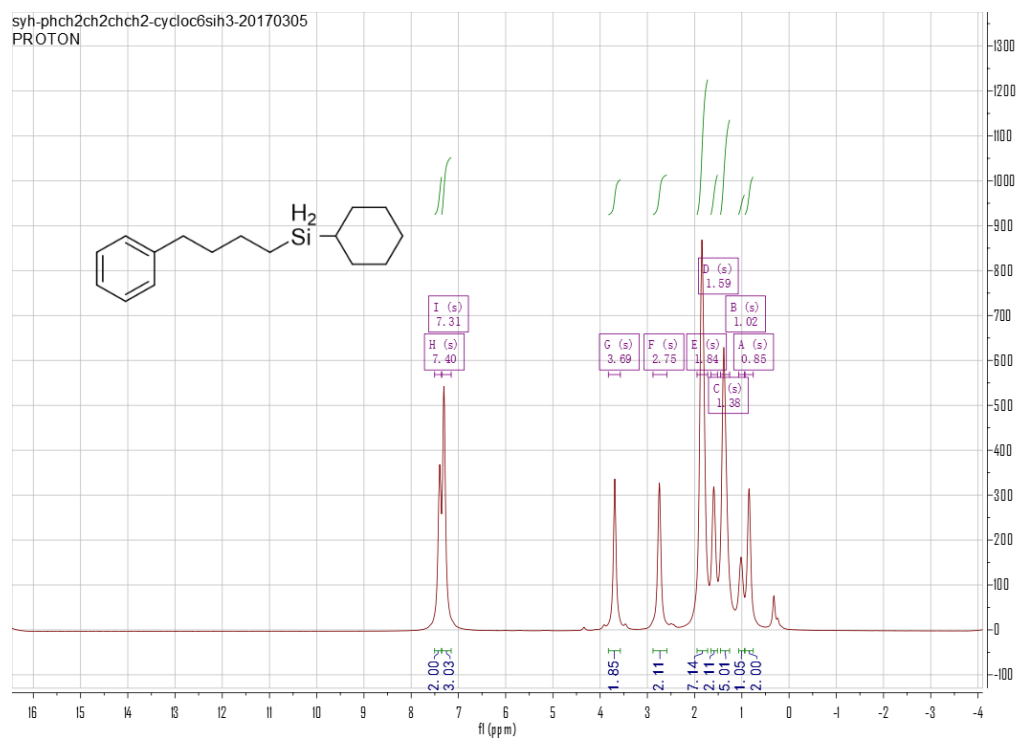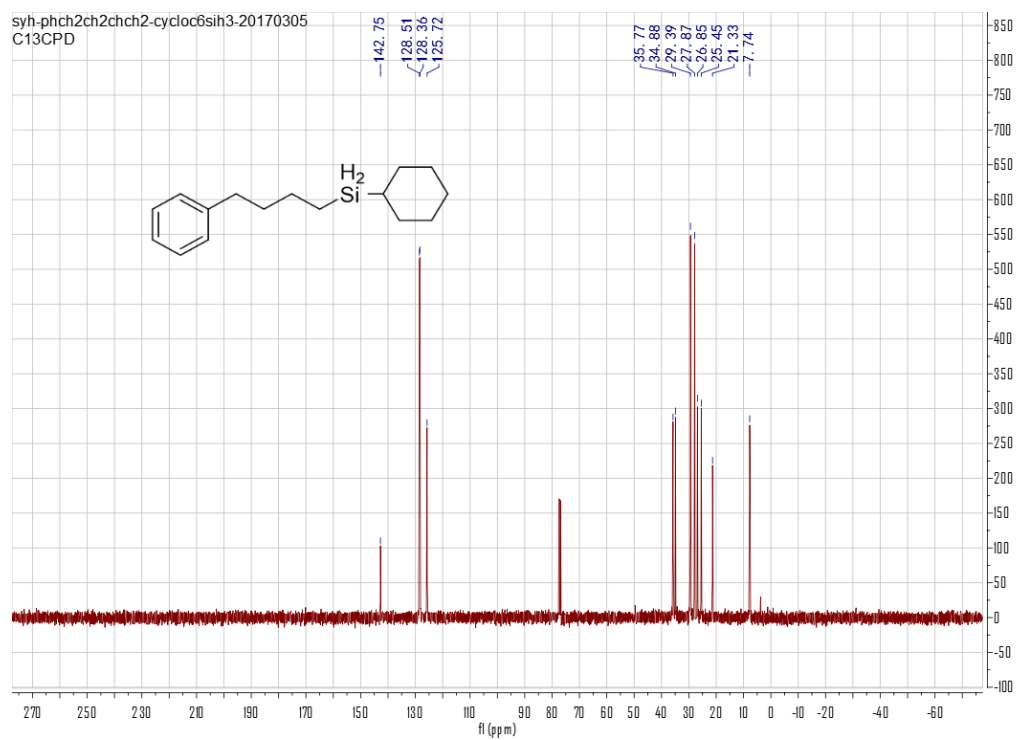

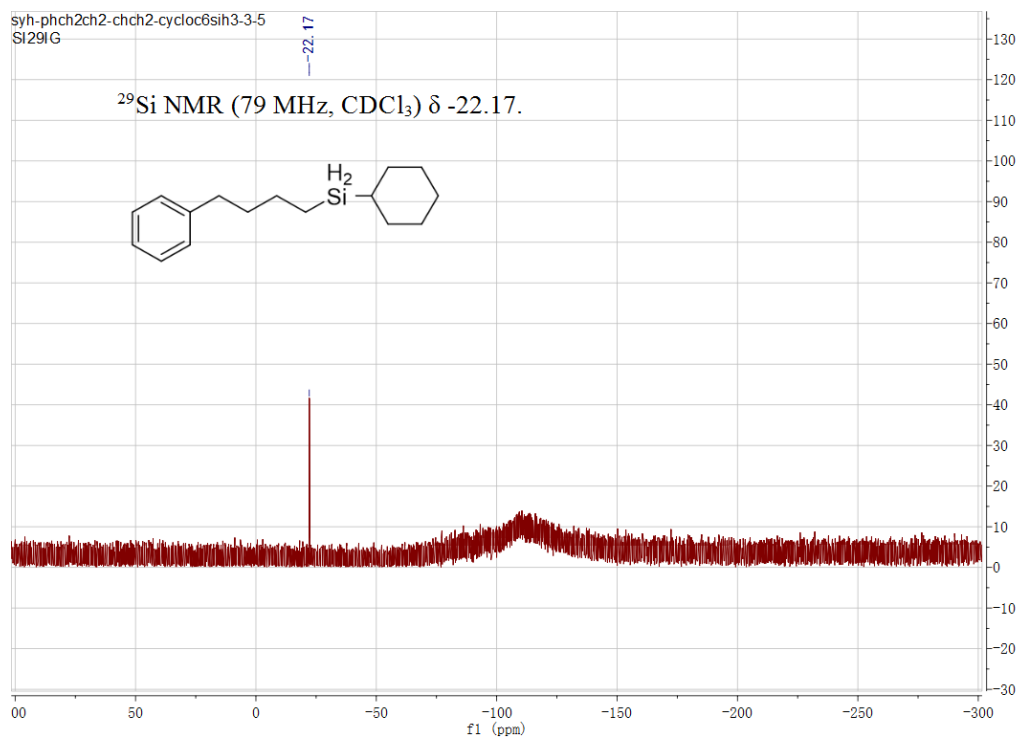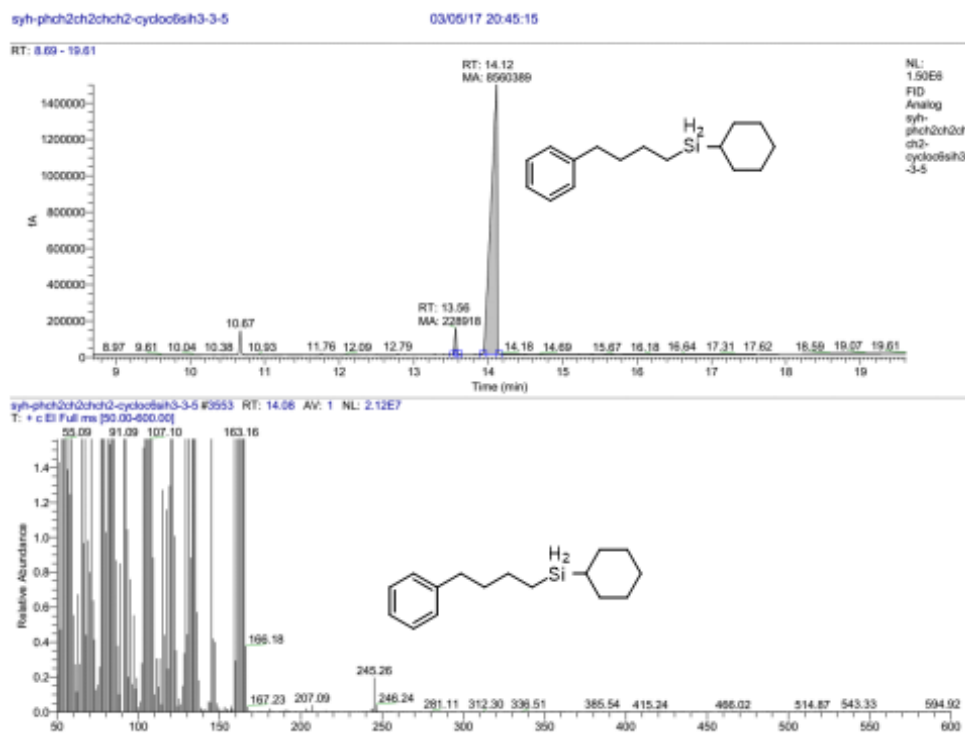

syh-huanjiji-chch2-cycloc6sih3-20170305  
PROTON

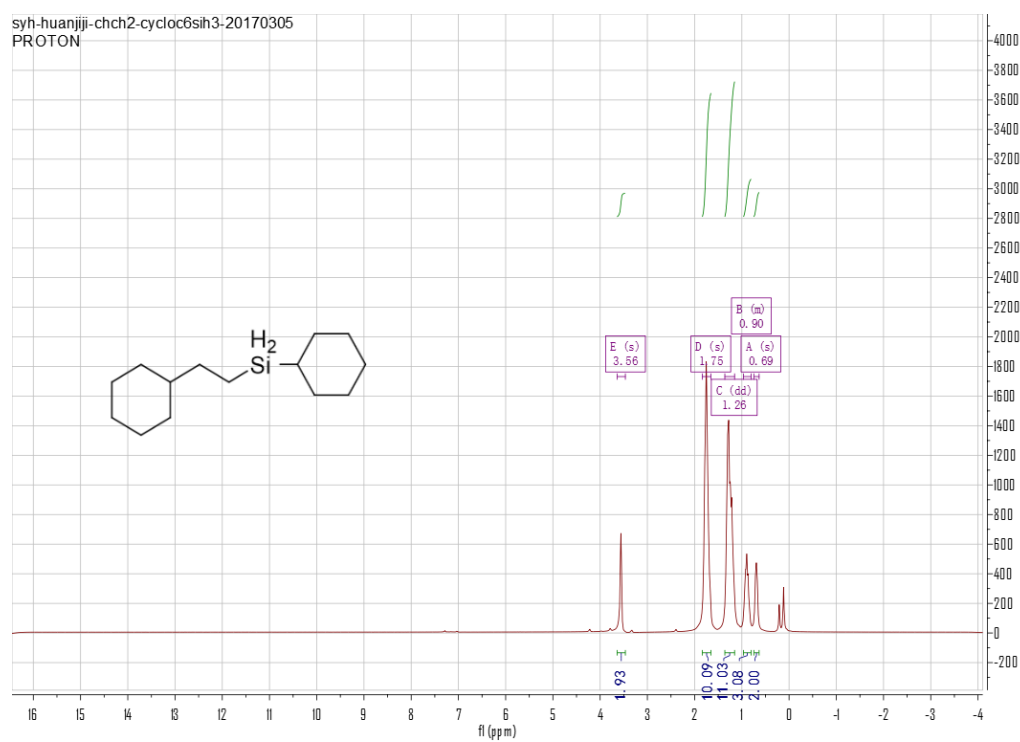

syh-huanjiji-chch2-cycloc6sih3-20170305  
C13CPD

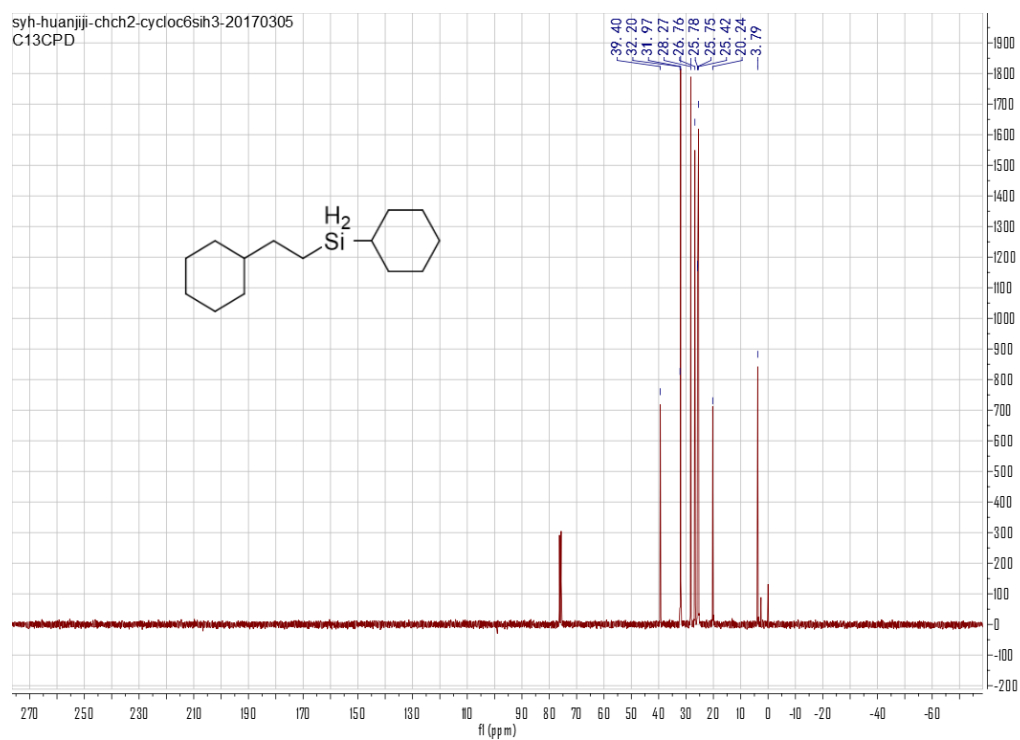

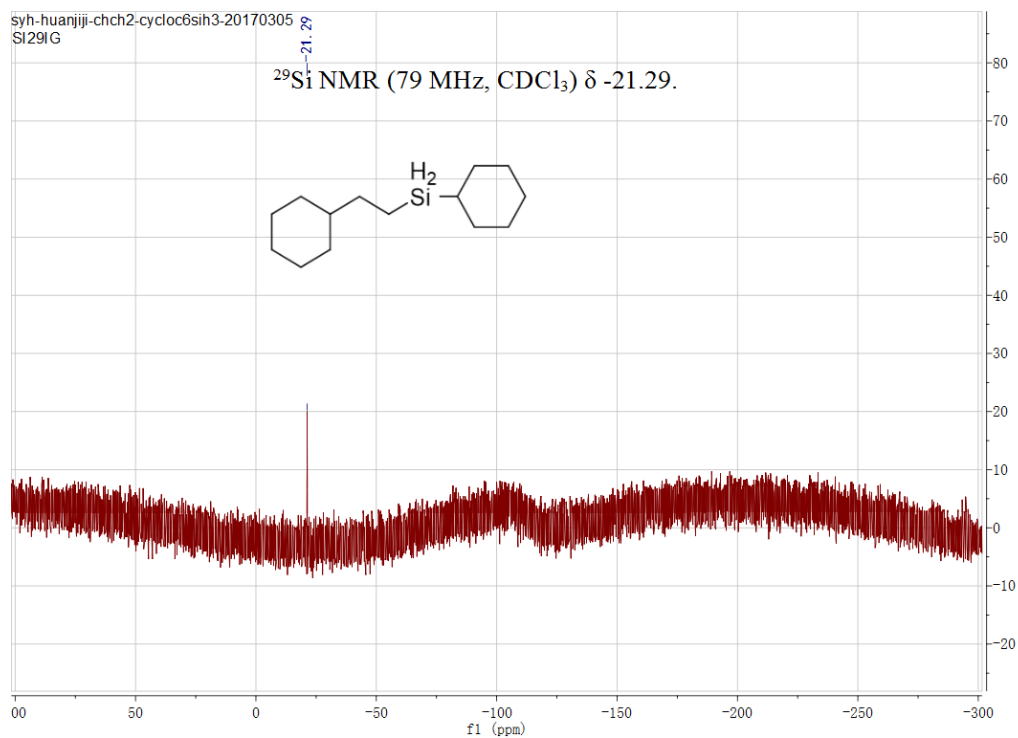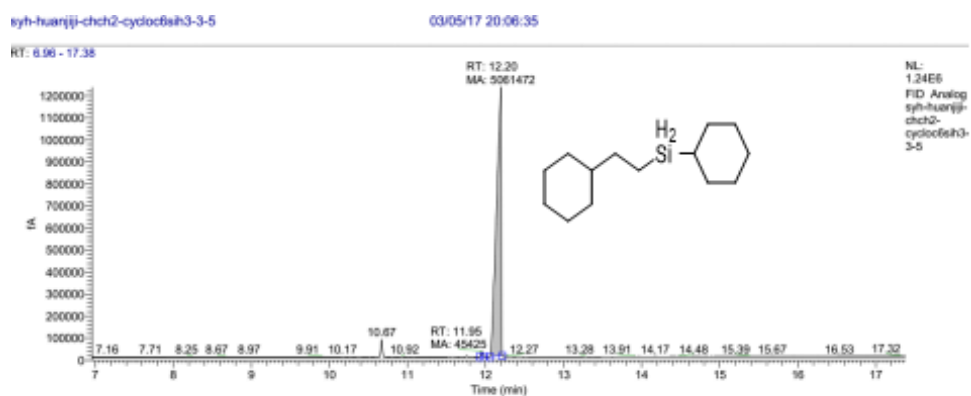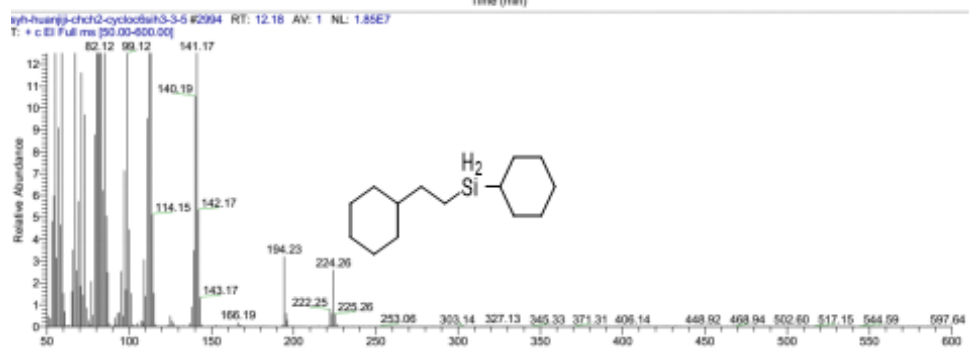

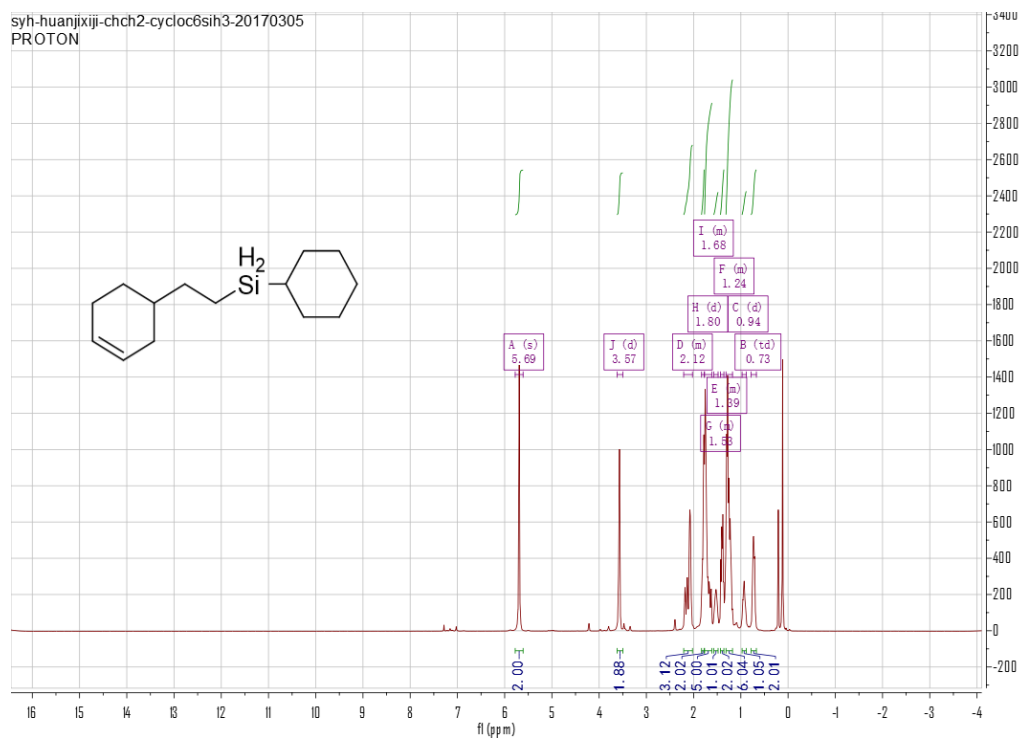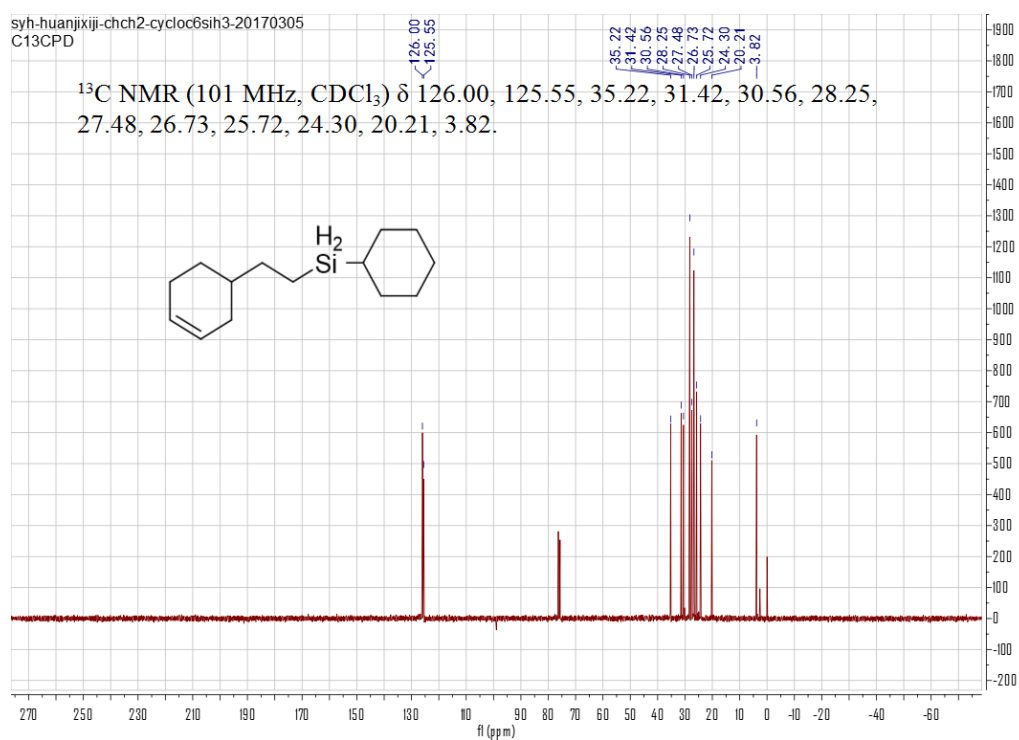

$^{13}\text{C}$  NMR (101 MHz,  $\text{CDCl}_3$ )  $\delta$  126.00, 125.55, 35.22, 31.42, 30.56, 28.25, 27.48, 26.73, 25.72, 24.30, 20.21, 3.82.

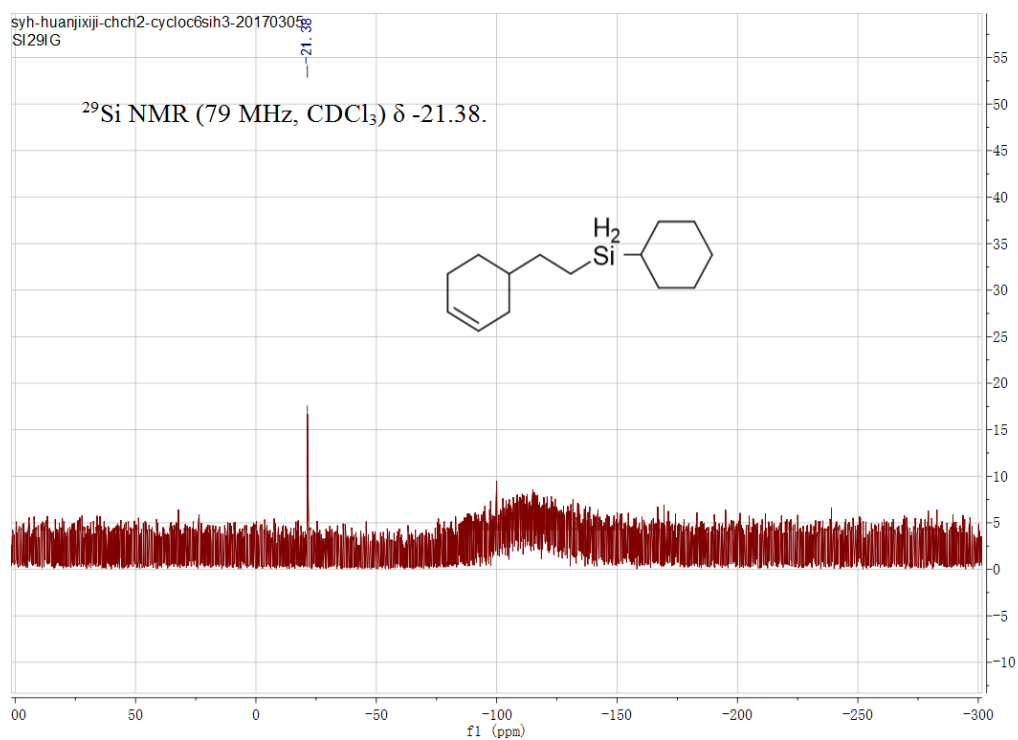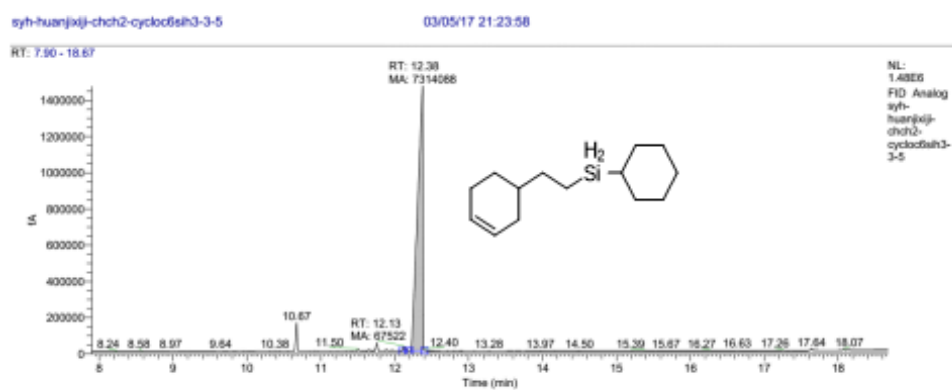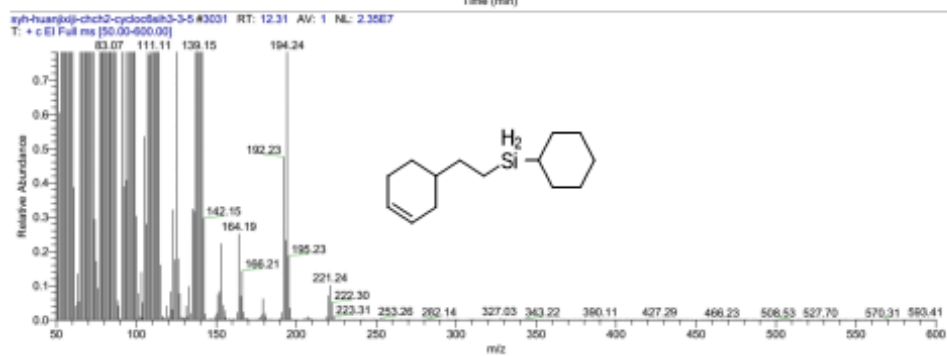



syh-n-c4-chch2-cycloc6sih3-20170305  
PROTON

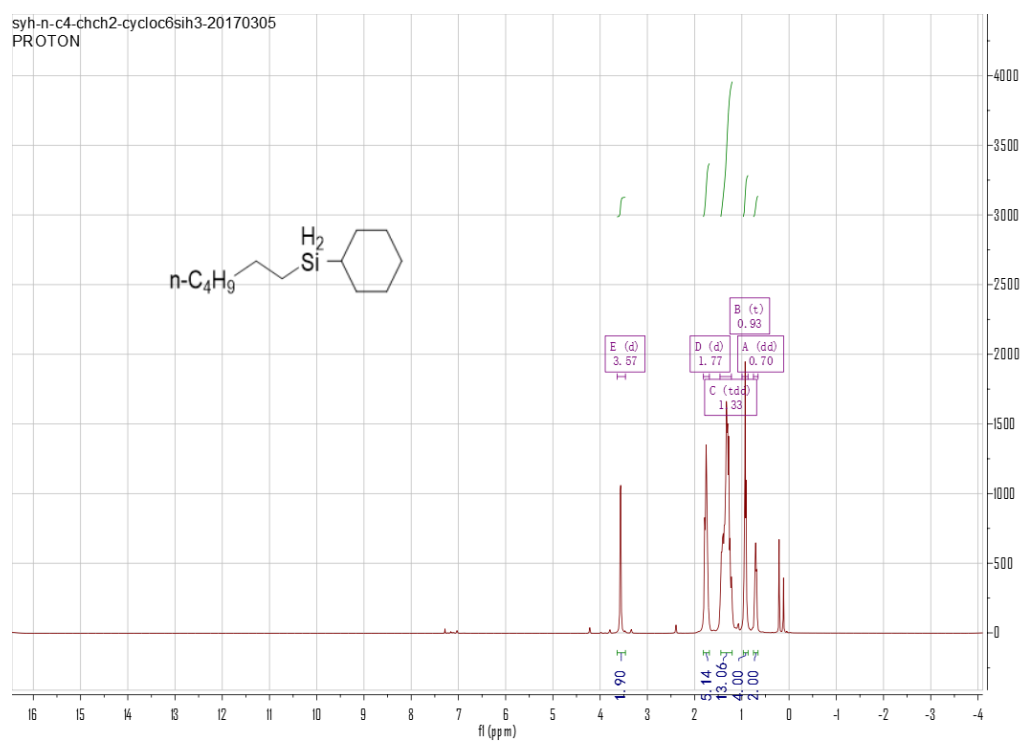

syh-n-c4-chch2-cycloc6sih3-20170305  
C13CPD

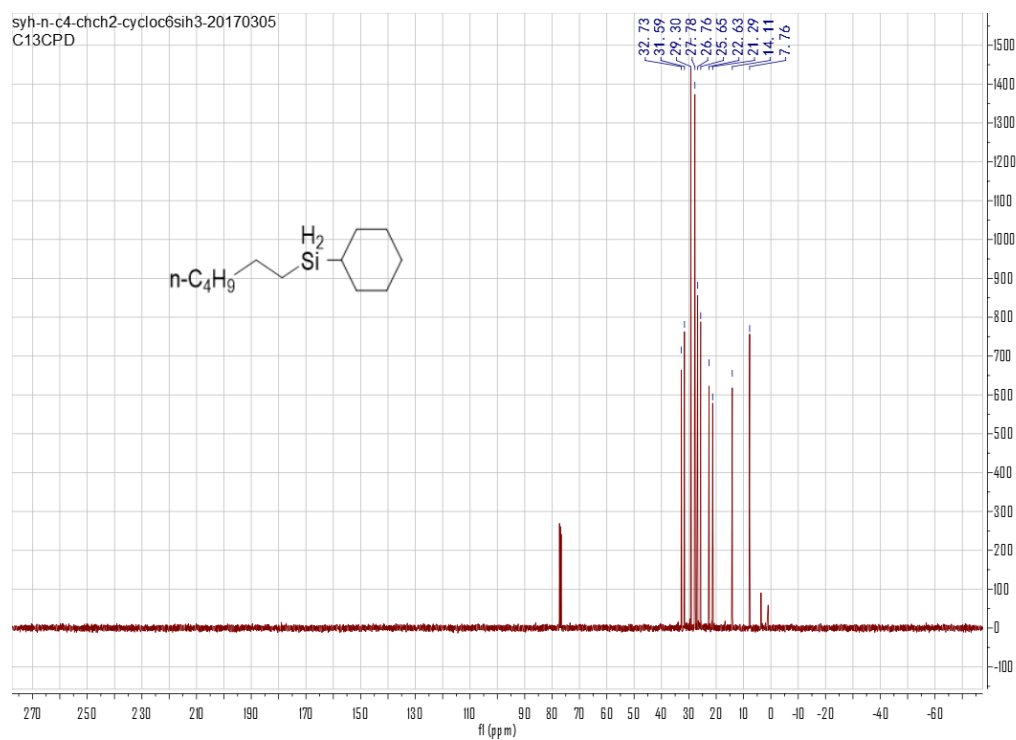

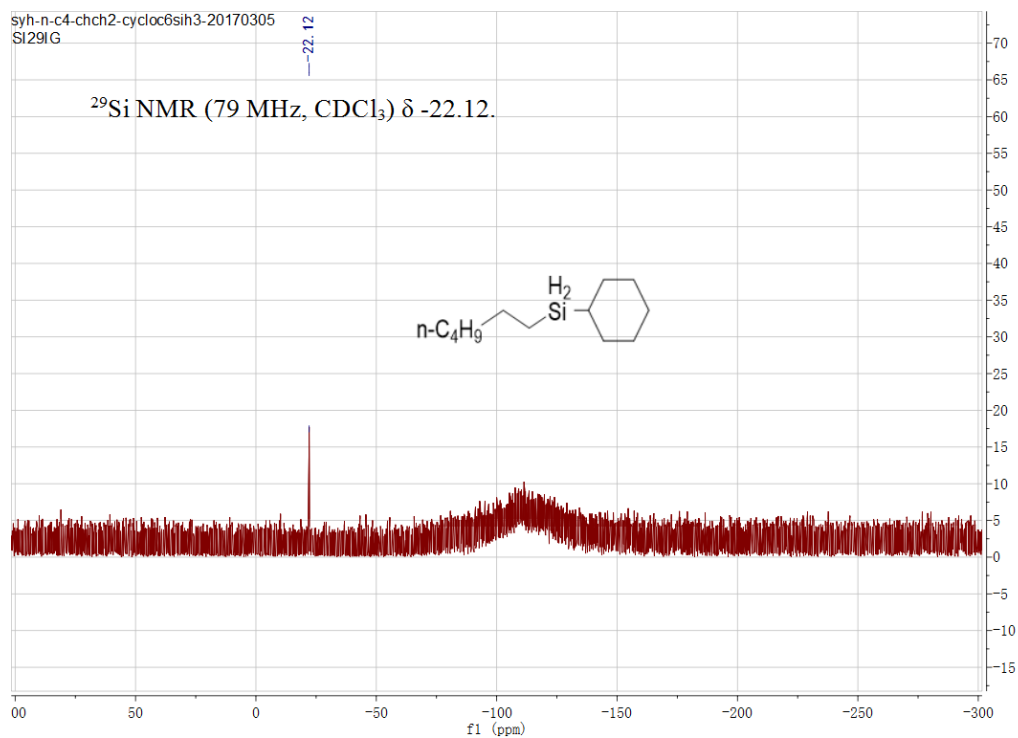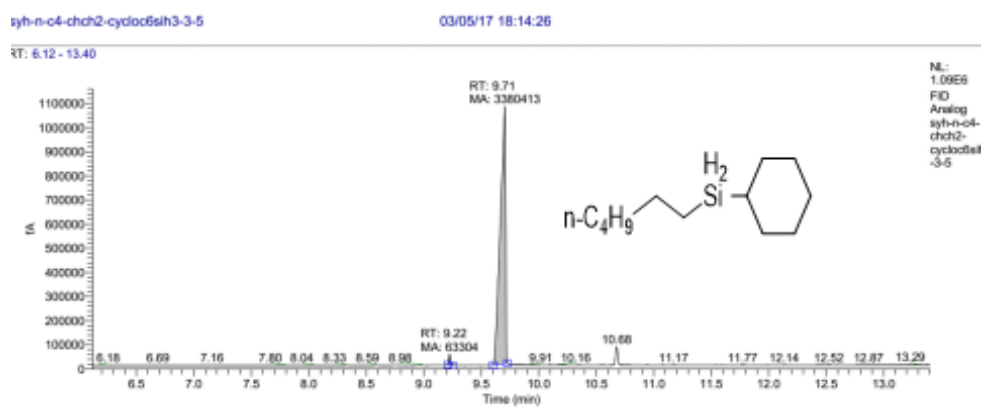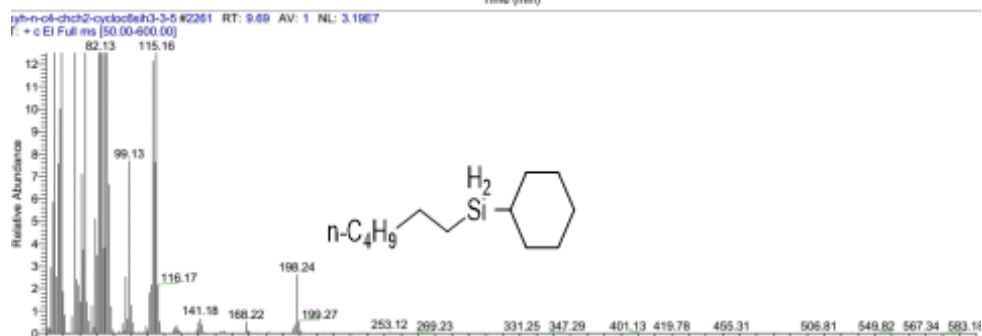

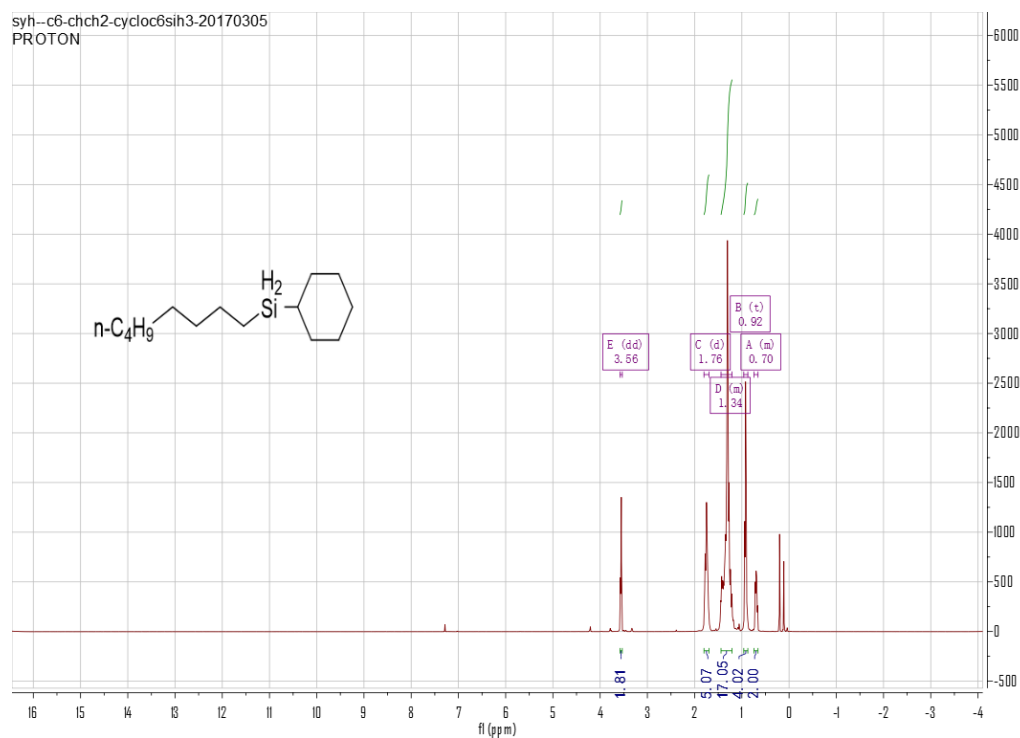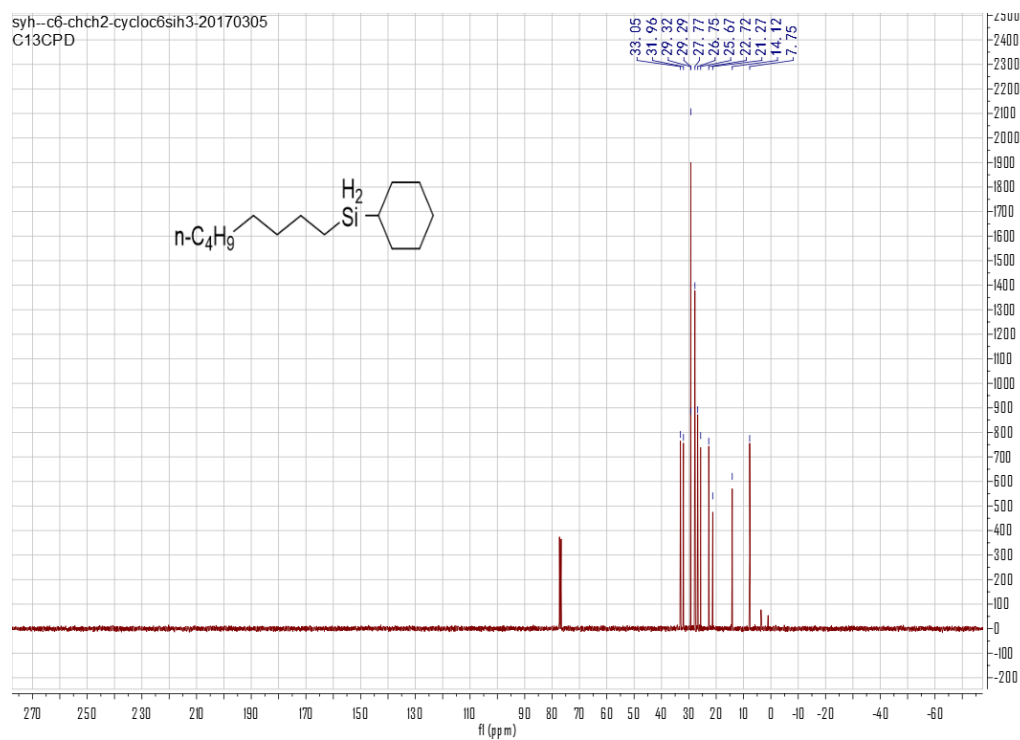

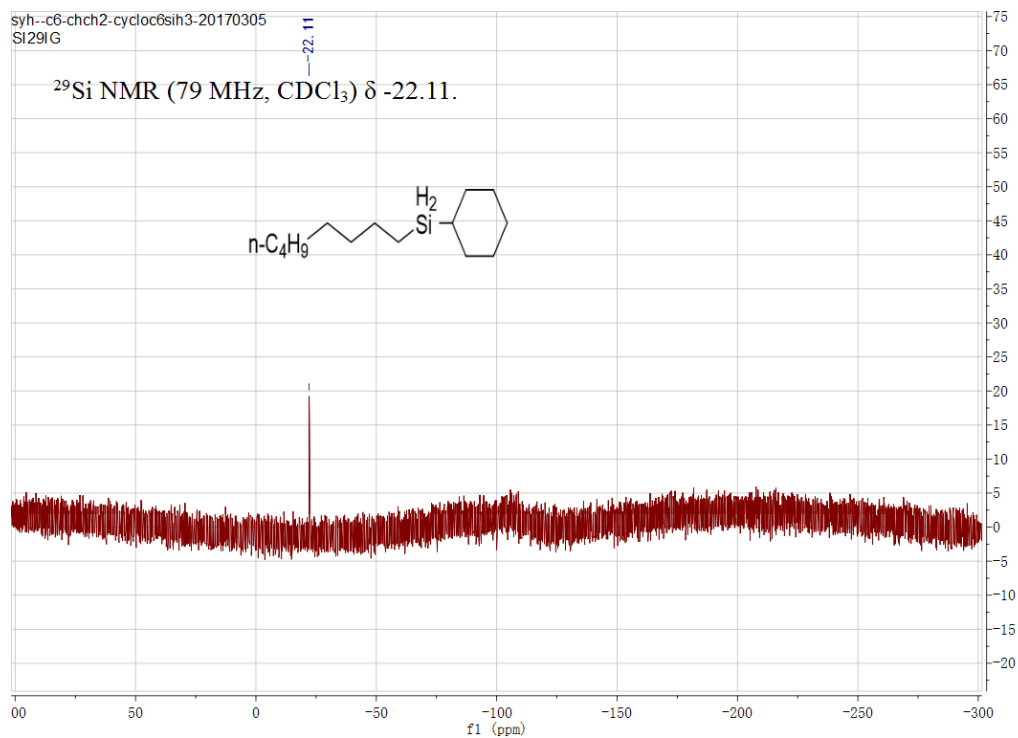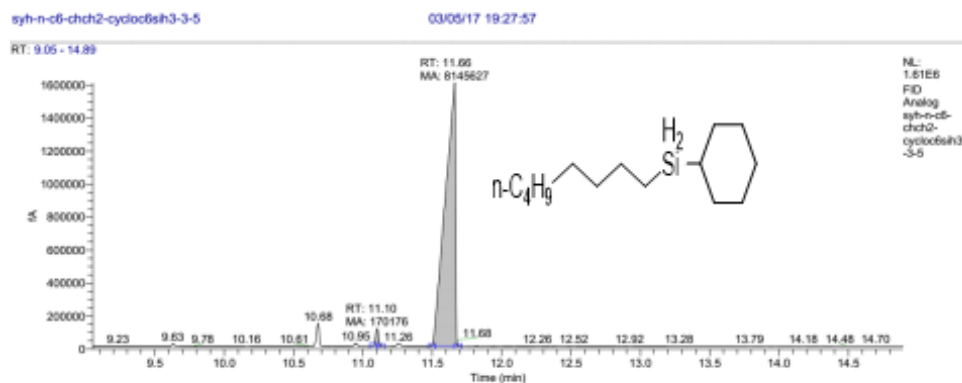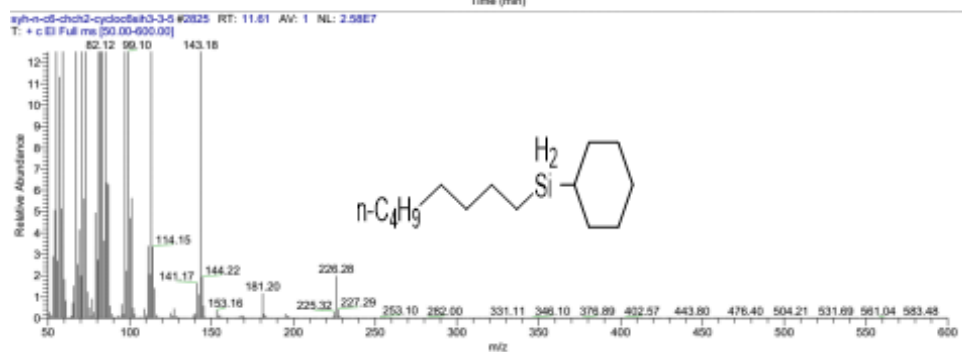

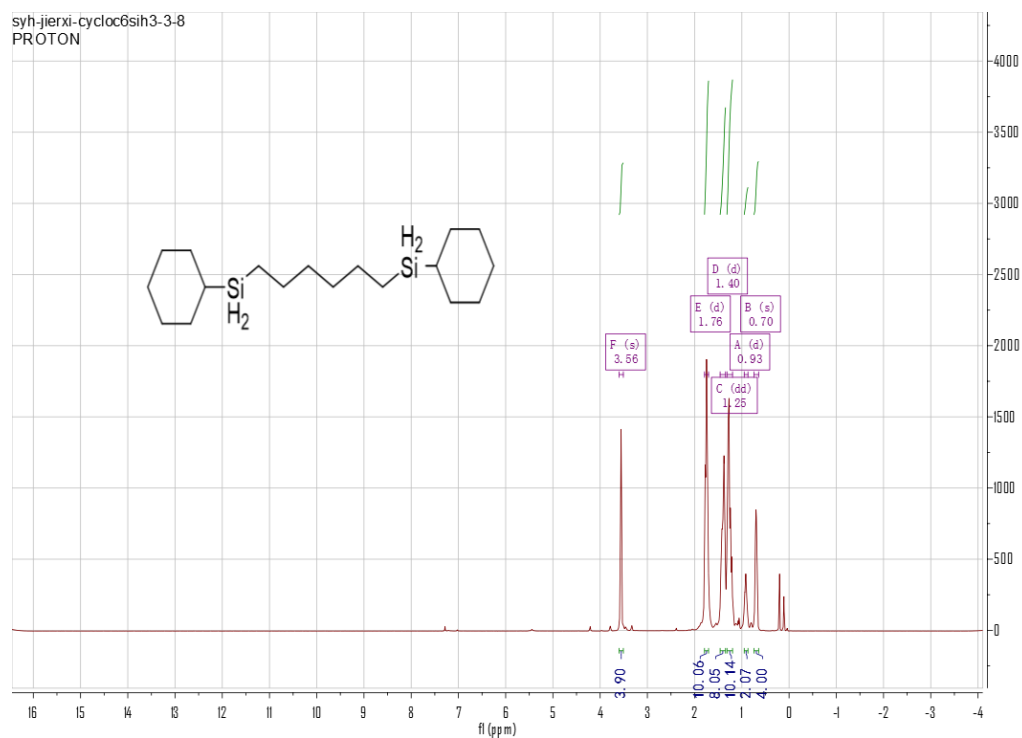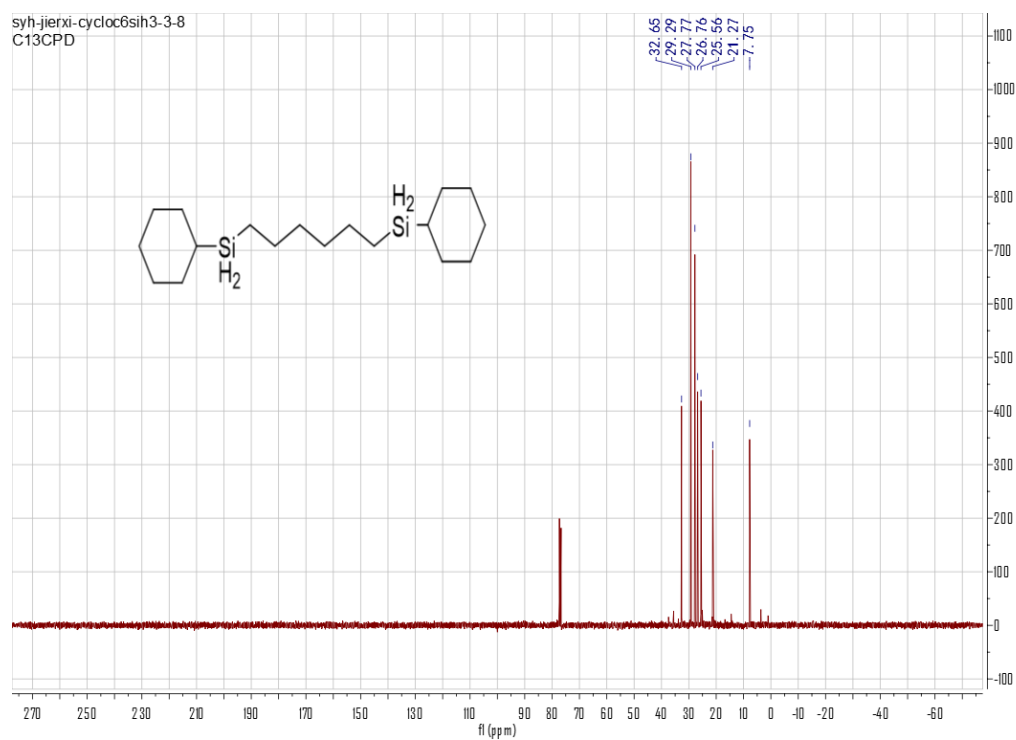

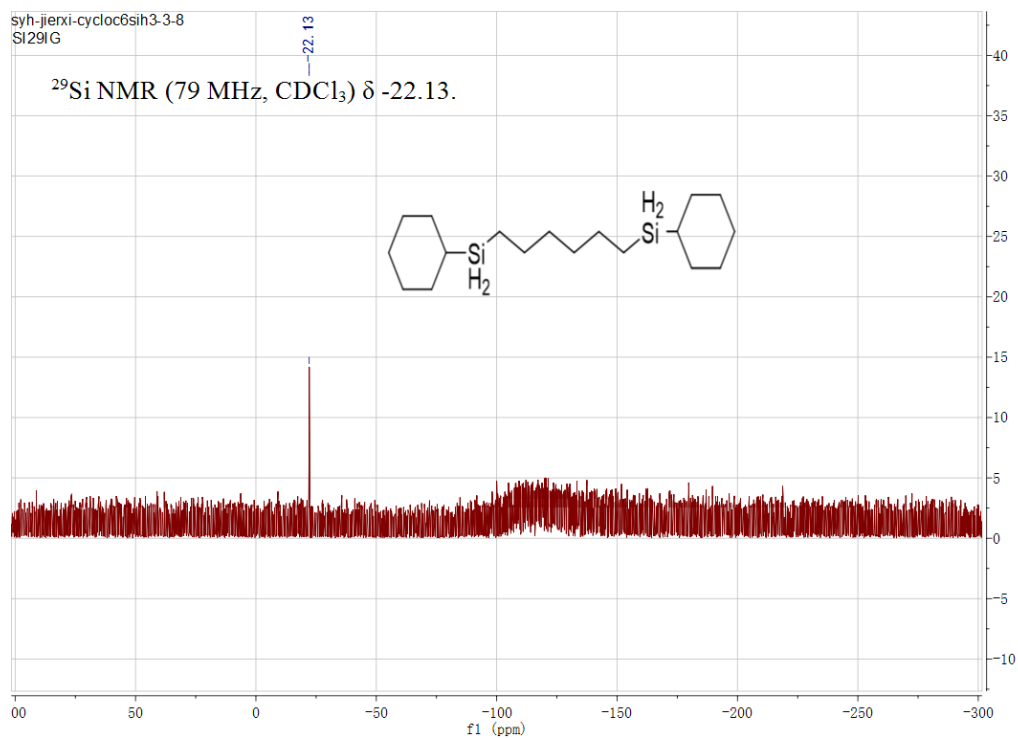

C:\DATE\syh-jierxi-cycloc6sih3-3-7

03/07/17 17:59:30

RT: 12.85 - 20.87

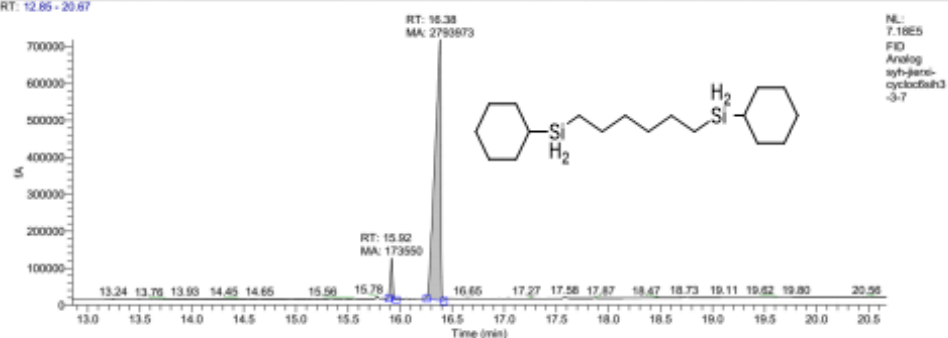

syh-jierxi-cycloc6sih3-3-7 64216 RT: 16.34 AV: 1 NL: 1.68E7  
T: + c EI Full ms [50.00-600.00]

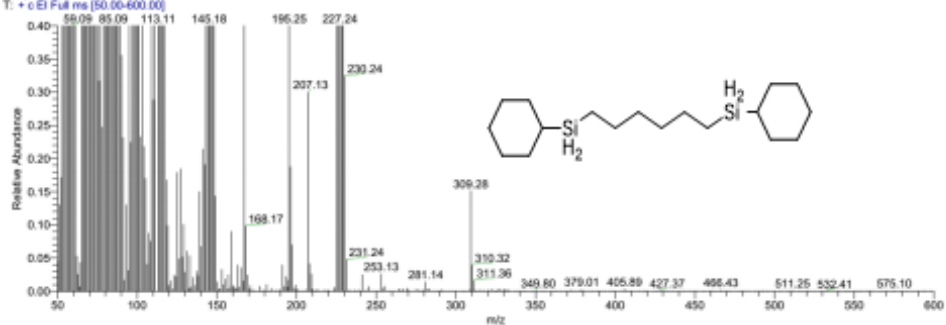

Supplement: c7dt01837a1.pdf [file c7dt01837a1.pdf]
